# Supplementary material for: The Structure of an NDR/LATS Kinase–Mob Complex Reveals a Novel Kinase–Coactivator System and Substrate Docking Mechanism
Source: PubMed Central journal article supplement (PMC4428629; doi:10.1371/journal.pbio.1002146), 2015-05-12

**Figure S2. Additional information on the crystal structures of Cbk1–Mob2 complexes**

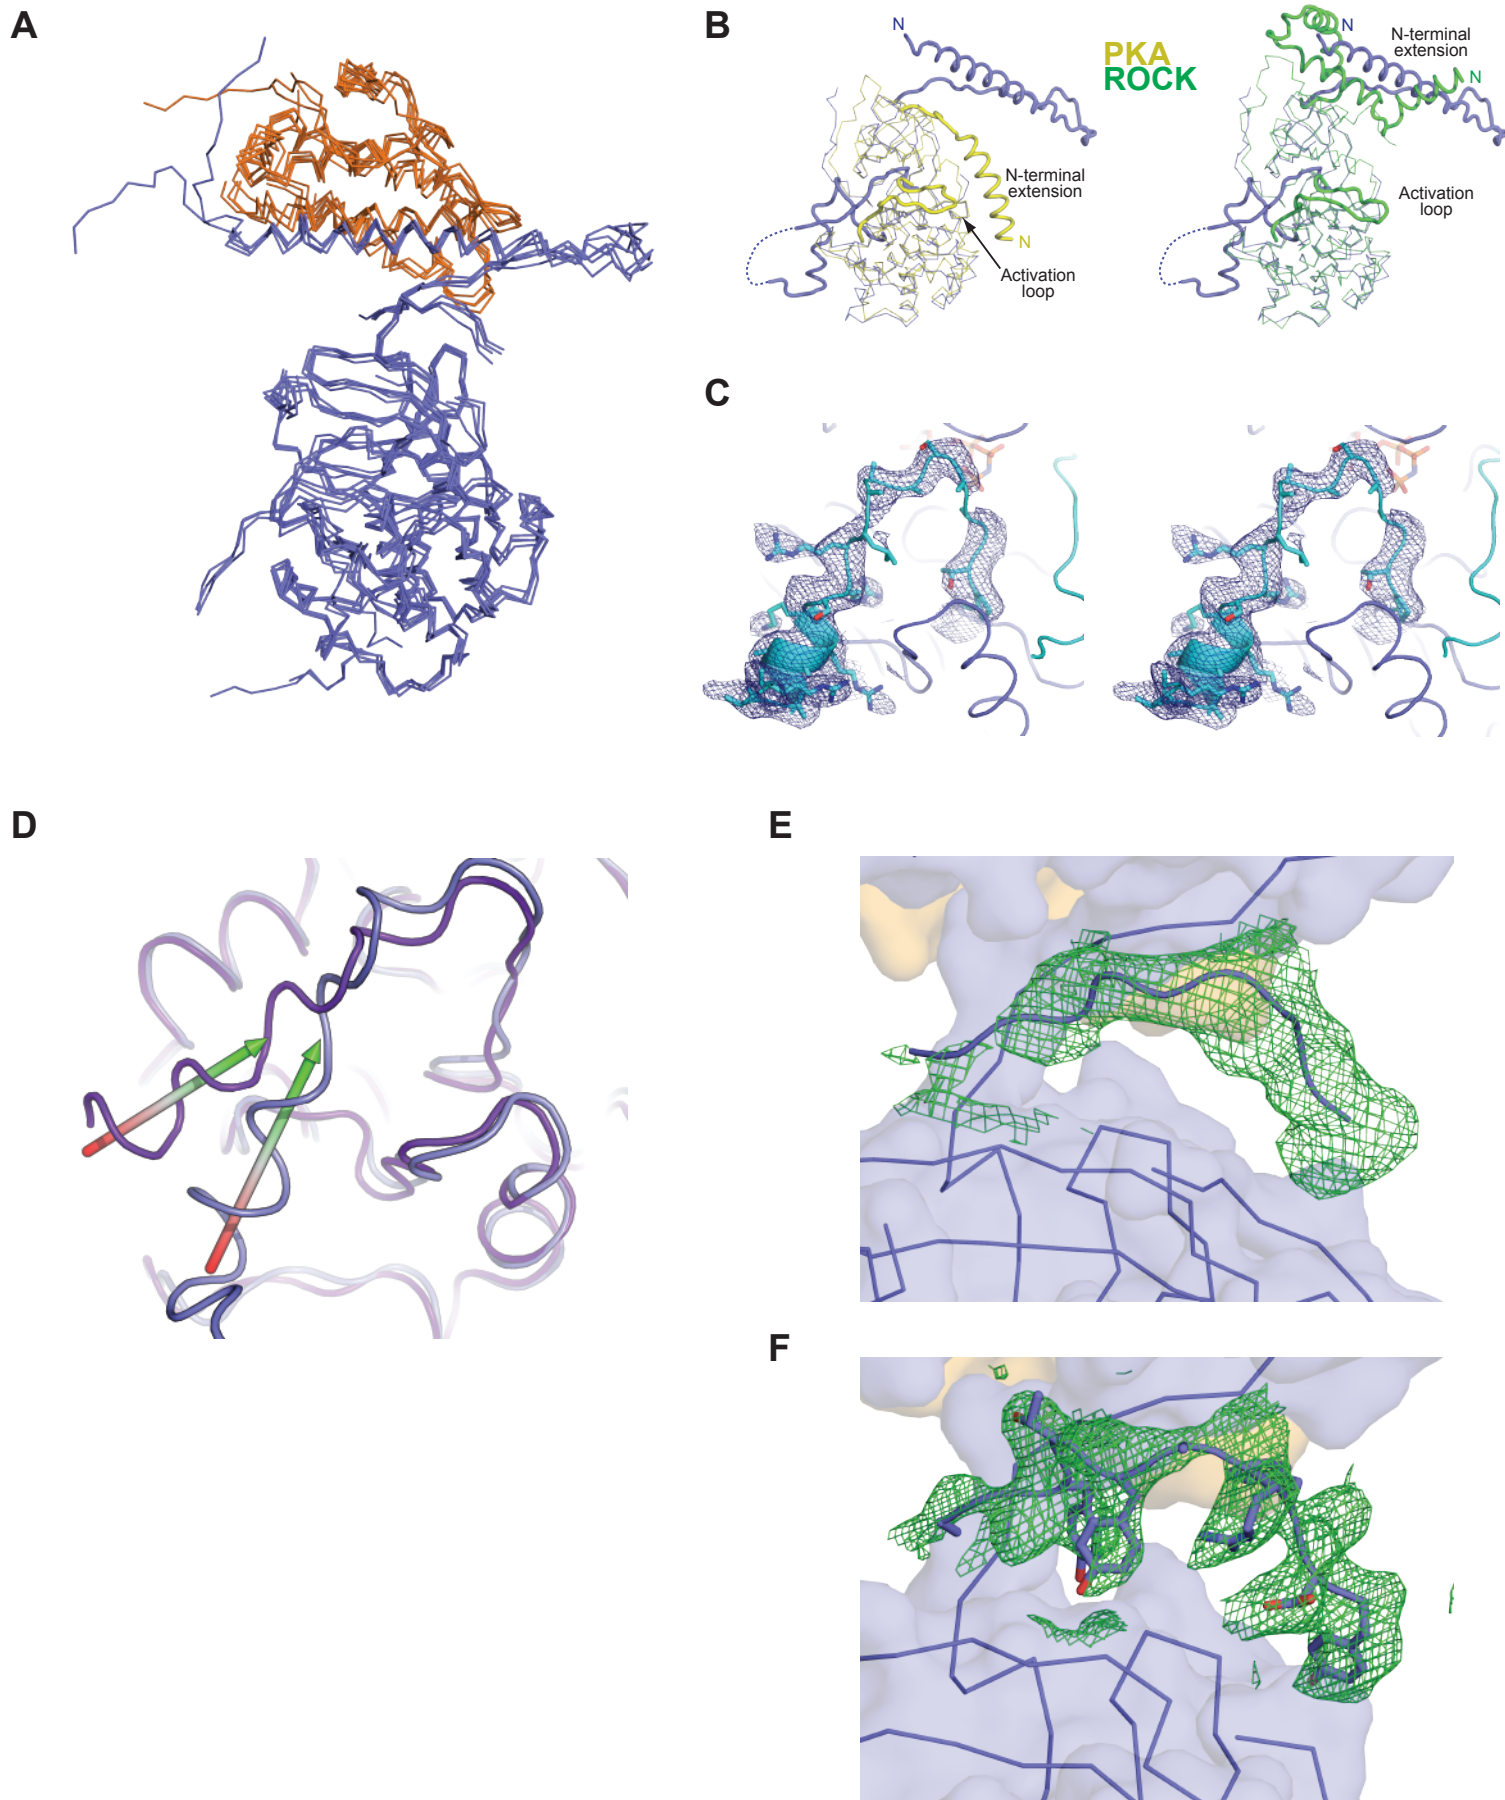

Supplement: pbio.1002146.s008.pdf [file pbio.1002146.s008.pdf]
