# Supplementary material for: The Structure of an NDR/LATS Kinase–Mob Complex Reveals a Novel Kinase–Coactivator System and Substrate Docking Mechanism
Source: PubMed Central journal article supplement (PMC4428629; doi:10.1371/journal.pbio.1002146), 2015-05-12

**Figure S3. Characterization of the Cbk1 hydrophobic motif and its binding to the Cbk1–Mob2 complex**

**A**

|              | Direct $K_d$<br>( $\mu\text{M}$ ) | Competitive $K_d$<br>with HM-P ( $\mu\text{M}$ ) | Competitive $K_d$<br>with pepSSD1<br>( $\mu\text{M}$ ) |
|--------------|-----------------------------------|--------------------------------------------------|--------------------------------------------------------|
| HM peptide   | 33                                | ND                                               | ND                                                     |
| HM-P peptide | 6                                 | 45                                               | No competitive binding                                 |

**B**

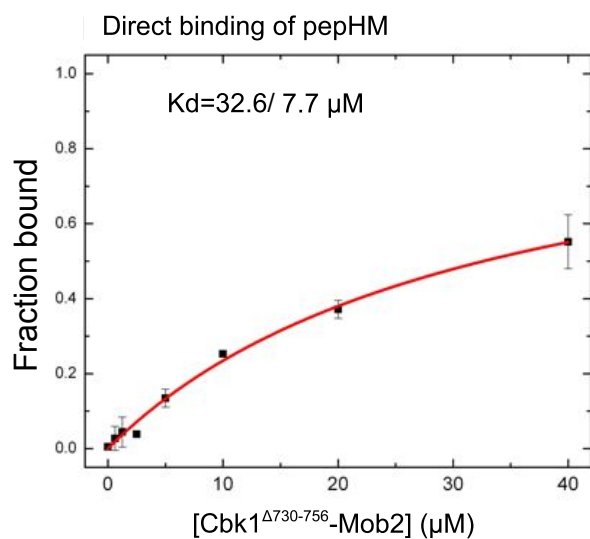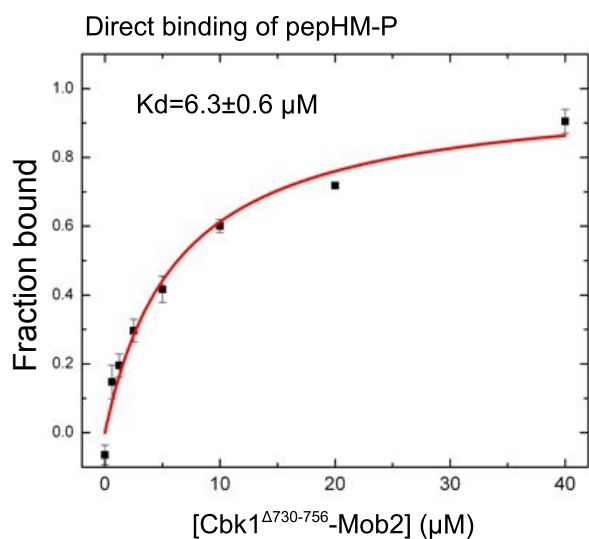

**C**

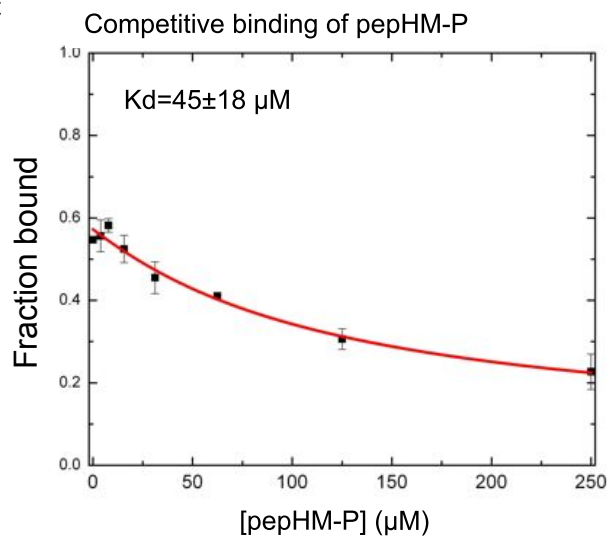

**D**

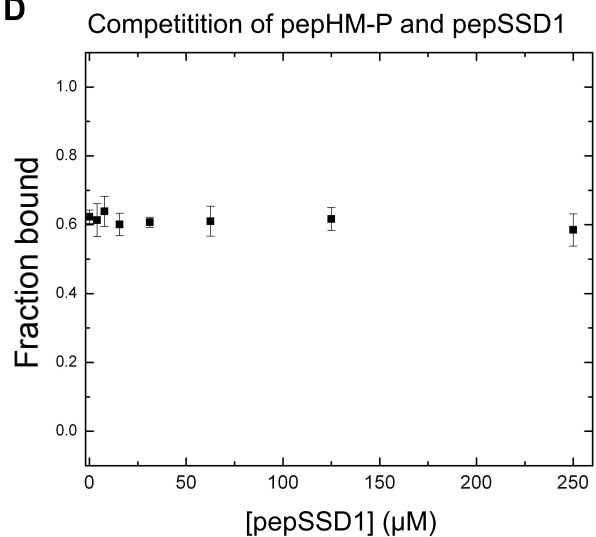

Supplement: pbio.1002146.s009.pdf [file pbio.1002146.s009.pdf]
