# Supplementary material for: The Structure of an NDR/LATS Kinase–Mob Complex Reveals a Novel Kinase–Coactivator System and Substrate Docking Mechanism
Source: PubMed Central journal article supplement (PMC4428629; doi:10.1371/journal.pbio.1002146), 2015-05-12
Supplement: pbio.1002146.s010.pdf [file pbio.1002146.s010.pdf]

A

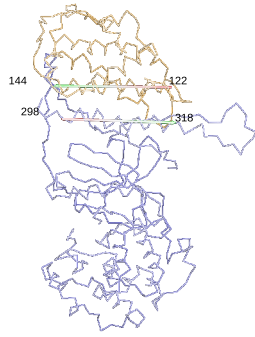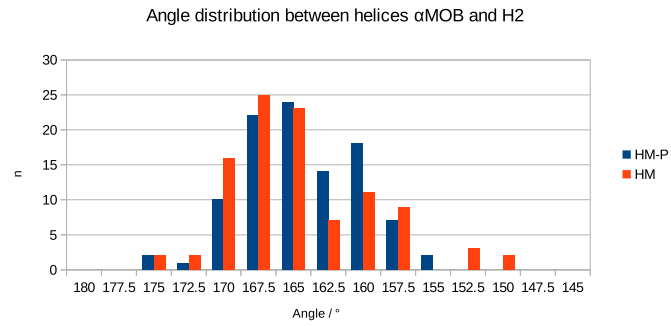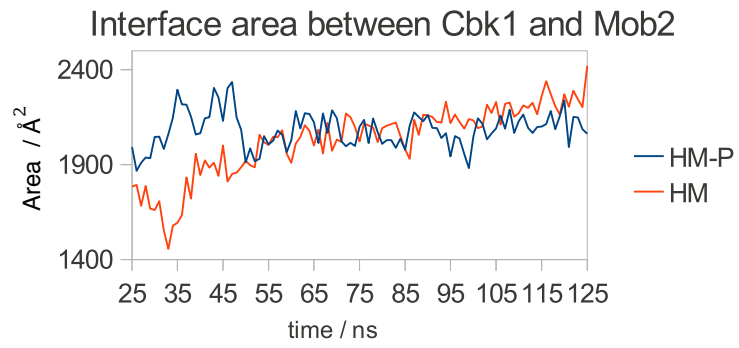

B

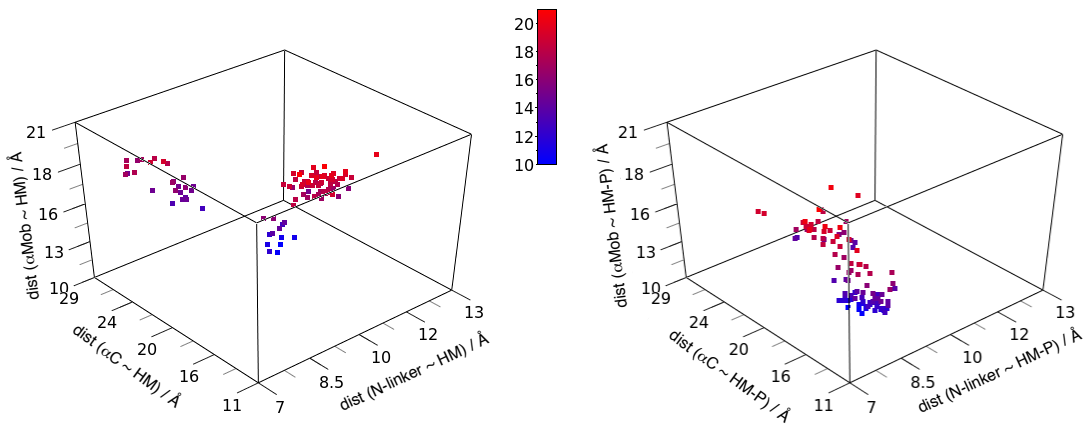

C

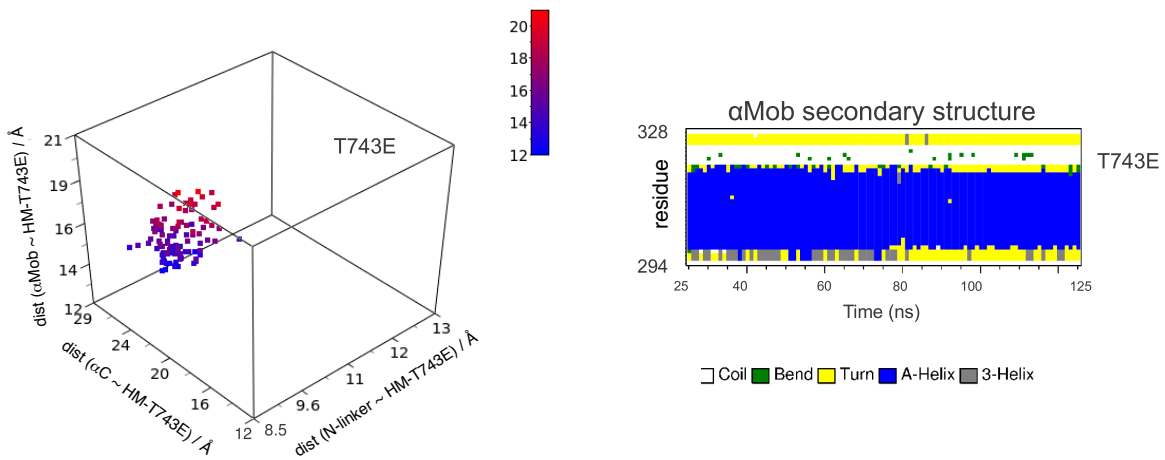

Figure S4
