# Supplementary material for: The Structure of an NDR/LATS Kinase–Mob Complex Reveals a Novel Kinase–Coactivator System and Substrate Docking Mechanism
Source: PubMed Central journal article supplement (PMC4428629; doi:10.1371/journal.pbio.1002146), 2015-05-12
Supplement: pbio.1002146.s013.pdf [file pbio.1002146.s013.pdf]

**Figure S7. Co-occurrence of docking motifs and Cbk1 phosphorylation consensus sites is extremely significant, and docking sites predict consensus site conservation and phosphorylation**

docking motif:  absent  present  present, conserved

**A.**

**docking motifs predict phosphorylation sites**

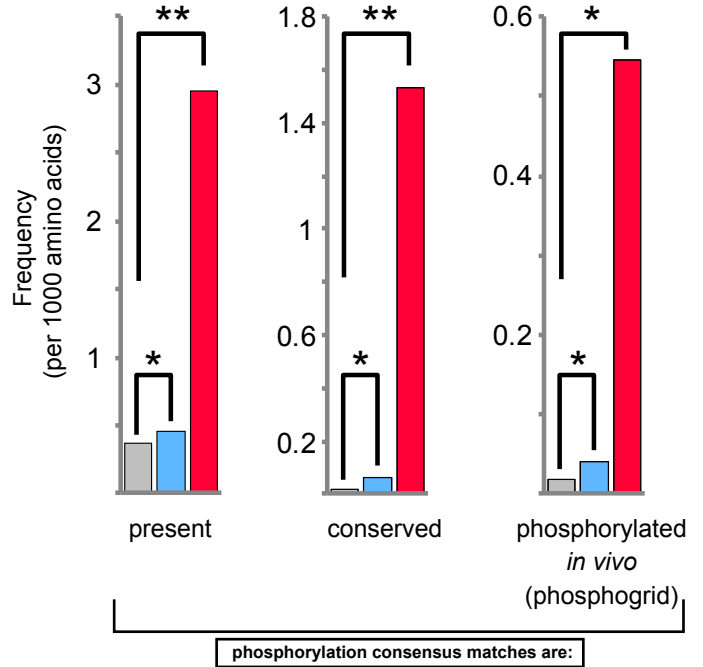

**B.**

**phosphorylation consensus in proteins with docking motifs are more likely to be conserved and phosphorylated in vivo.**

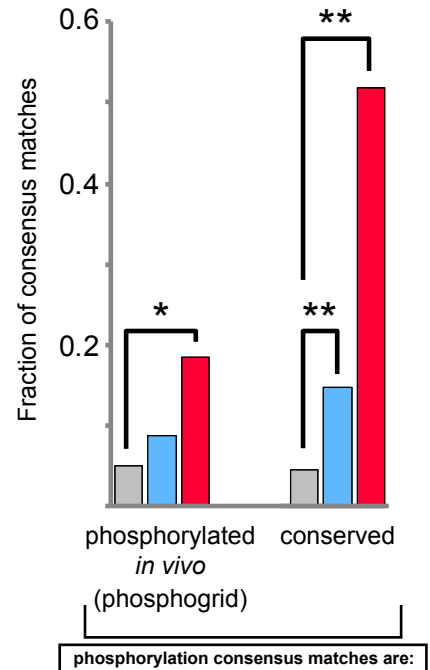

\*  $p < 0.05$

\*\*  $p < 10^{-5}$
