# Supplementary material for: The Structure of an NDR/LATS Kinase–Mob Complex Reveals a Novel Kinase–Coactivator System and Substrate Docking Mechanism
Source: PubMed Central journal article supplement (PMC4428629; doi:10.1371/journal.pbio.1002146), 2015-05-12

Figure S9. Alignment of Cbk1 docking motif interaction region in D-E loop and CLT region

C

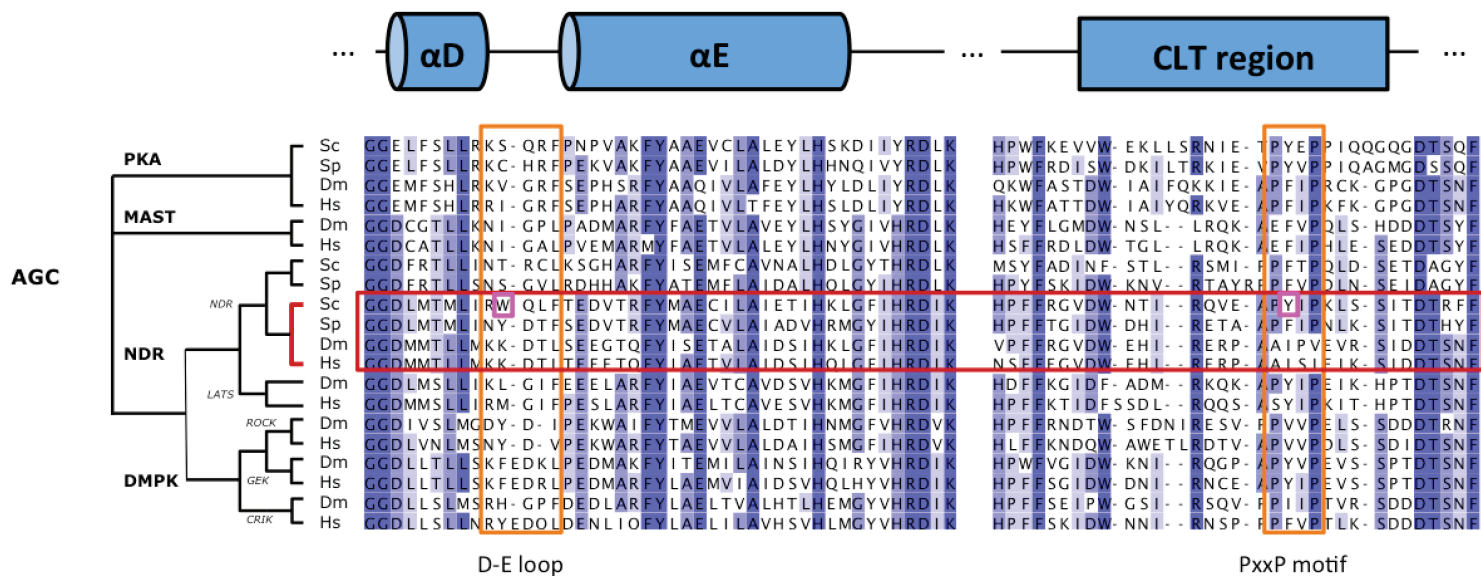

Supplement: pbio.1002146.s015.pdf [file pbio.1002146.s015.pdf]
