# Supplementary material for: The Structure of an NDR/LATS Kinase–Mob Complex Reveals a Novel Kinase–Coactivator System and Substrate Docking Mechanism
Source: PLoS Biol. 2015 May 12;13(5):e1002146. doi: 10.1371/journal.pbio.1002146 (PMC4428629; doi:10.1371/journal.pbio.1002146)
Supplement: S1 Data — This file also contains data quantifying the effectiveness of cell separation in different genetic backgrounds. In these experiments we counted the number of cells present in clumps of specific sizes in random microscope fields, and then binned these groups into clump size ranges: 1–4 cells, 5–10 cells, 11–20 cells, and ≥21 cells per clump. We quantified this for the indicated allele combinations, scoring three independent isolates of each allele combination. The number of cell bodies present in clumps of different sizes is a function of the efficiency of cell separation. (XLSX) [file pbio.1002146.s001.xlsx]

## Sheet: MD Simulations
Figure 3C/1				Figure 3C/2				Figure S4A/1				Figure S4A/2				Figure S4B/1				Figure S4B/2				Figure S4C
Distance / Å				Distance / Å				Interface area between Cbk1 and Mob2				Angle distribution between helices αMOB and H2 / n				Distance / Å				Distance / Å				Distance / Å
αMOB ~ HM	neck ~ HM	αC ~ HM		αMOB ~ HM-P	neck ~ HM-P	αC ~ HM-P		Time / ns	HM	HM-P		Angle / °	HM	HM-P		αMOB ~ HM	neck ~ HM	αC ~ HM		αMOB ~ HM-P	neck ~ HM-P	αC ~ HM-P		αMOB ~ HM T743E	neck ~ HM T743E	αC ~ HM T743E
9.56233	11.9164	17.0101		9.2266	13.6786	13.5394		0	1762.47	1666.81		180	0	0		7.75723	26.9859	18.0742		9.34759	23.7908	13.3074		17.0947	9.04854	19.247
9.94143	13.3713	16.63		9.11969	13.1923	13.5767		1	1566.27	1827.62		177.5	0	0		7.72974	27.0833	17.574		9.30415	21.054	14.2874		16.685	10.128	19.7855
10.7466	11.9122	16.5584		9.47461	13.8713	13.9861		2	1607.69	1678.62		175	2	2		8.09553	25.6485	16.6077		9.92329	22.3617	12.8647		17.5704	9.59164	20.9976
10.2081	12.1287	16.3104		10.0755	13.5378	13.2454		3	1666.57	1779.99		172.5	2	1		8.29429	24.298	16.0159		9.55185	22.6448	12.7629		16.9612	9.08322	21.321
9.49998	12.1682	15.7123		9.51646	13.1176	13.2229		4	1546.12	1984.69		170	16	10		7.82012	26.4221	17.8041		9.48025	25.4012	11.9574		16.5567	8.97419	22.1059
10.0914	12.8412	15.5792		9.55172	13.5189	13.1563		5	1775.68	2041.95		167.5	25	22		8.51417	26.8887	17.9961		9.27458	24.9093	12.2516		17.2975	9.39001	21.2515
9.69436	12.0846	16.0796		9.61989	13.2332	13.5453		6	1762.75	2088.53		165	23	24		8.38829	25.3538	18.4672		10.1323	21.5427	12.0014		16.6163	9.03973	21.5605
9.66205	12.2308	15.8624		9.12179	13.188	13.7231		7	1577.39	2070.79		162.5	7	14		8.15861	25.8577	18.3944		10.0228	21.4392	12.707		16.7186	9.02387	21.9905
9.81654	12.2634	15.8405		9.30995	13.7002	13.4806		8	1726.06	1961.45		160	11	18		8.46438	28.6588	17.2966		10.2897	21.9615	12.0913		16.7336	8.99957	20.6947
10.4509	12.7182	16.6234		9.261	13.3541	14.4844		9	1543.99	2108.82		157.5	9	7		8.60323	25.869	17.9079		9.97611	21.9874	13.1285		16.3694	9.33646	21.5304
9.98517	12.8163	17.0219		9.13874	12.7336	14.2564		10	1728.44	2156.8		155	0	2		8.14558	28.5831	16.683		10.1868	22.5483	13.4997		17.3899	9.16825	20.7338
10.6148	12.6986	17.8865		9.47263	13.2186	14.942		11	1816.41	2060.51		152.5	3	0		8.43696	28.0797	17.5756		10.3429	24.6824	15.053		16.4927	8.90713	22.2519
10.2038	12.3537	16.5089		9.26448	12.6517	14.7639		12	1680.3	2226.73		150	2	0		8.12884	28.4715	17.6365		9.89193	23.9794	14.0448		17.0897	9.01553	20.9705
9.83939	12.4208	16.9092		9.45765	12.3808	14.289		13	1757.18	1982.85		147.5	0	0		8.30892	24.2225	17.4566		9.96489	24.4754	13.8717		16.6654	9.06213	23.3808
10.6919	12.7283	17.1602		9.27804	12.7091	14.1044		14	1797.46	2065.68		145	0	0		8.52635	24.9376	17.0949		10.716	23.1101	14.6919		16.078	9.13106	22.7981
10.6001	12.4209	16.3929		9.12019	12.7863	14.2496		15	1817.48	1907.12						8.70012	24.5483	17.3494		9.44357	22.9131	14.1184		16.8206	9.3005	22.8573
10.5924	12.739	16.7265		9.19576	12.9739	14.2047		16	1842.63	2157.74						8.44297	23.2672	16.5205		9.0999	21.0518	13.9513		16.8355	9.25544	24.0902
10.6137	12.9236	15.6193		9.13729	13.1191	14.5268		17	1740.21	2062.08						8.49502	23.5659	17.2181		8.59767	26.2739	14.4205		16.8092	9.29633	22.9661
10.2316	13.179	16.8123		9.28595	12.7952	14.5202		18	1697.98	2137.49						8.92975	24.3881	16.5966		8.6065	25.6793	14.4593		16.8044	8.84614	23.4685
10.0004	13.1108	16.8174		10.2575	12.48	14.4086		19	1794.57	1950.89						8.56966	23.9065	16.311		8.80184	21.5066	14.6239		16.2289	9.0491	23.633
10.2161	12.7546	16.7954		9.42169	13.3597	13.4118		20	1980.61	2074.66						8.62591	24.8266	16.6925		9.07631	23.9993	13.5118		16.9666	9.12778	24.2583
9.92172	12.8281	16.4327		9.52239	12.7004	14.6069		21	1822.74	1957.58						8.388	23.5533	16.4982		9.36845	22.419	15.2745		17.222	9.04541	23.603
9.76807	12.6007	16.8017		9.4109	13.2348	15.2147		22	1815.86	1925.36						8.52799	24.2757	16.5641		8.97982	17.1615	14.7383		16.1012	9.08662	23.0867
9.50373	12.6915	16.4264		9.02449	12.9381	14.3783		23	1863.96	2020.81						8.20205	23.5493	17.2567		9.25496	19.8802	15.0098		18.1604	8.92768	22.7174
10.1433	12.7482	16.8294		9.2256	12.1909	15.1715		24	1753.42	2123.42						8.74003	22.8097	15.7873		9.09713	19.5866	14.6429		16.2781	8.68994	24.8485
10.0487	12.8179	15.7724		9.43512	12.1916	14.8581		25	1783.71	1992.85						8.72827	23.8155	16.6518		9.3032	19.0547	14.4453		17.7227	9.00313	23.603
10.466	12.8646	16.915		9.32977	12.0565	15.3187		26	1793.38	1867.74						9.06538	17.2556	15.0439		9.03333	19.02	14.2359		18.5741	9.50128	23.5383
10.9827	12.6566	16.7209		9.45304	12.6523	15.2001		27	1682.81	1909.8						9.50987	17.3945	14.5516		9.08274	20.9378	14.5331		18.1221	9.2472	23.9351
10.4955	12.8796	16.1184		9.40997	11.3626	14.3357		28	1787.23	1937.56						9.25269	17.6605	15.3928		9.05398	20.6682	15.0032		17.9284	9.49863	23.9634
11.0234	13.031	15.663		9.45224	12.0046	13.876		29	1668.17	1934.13						9.77924	16.9477	14.918		8.80066	21.3355	14.8224		17.7669	9.10647	21.9195
10.6141	13.2893	15.28		9.13009	12.1843	13.4869		30	1660.89	2045.47						8.75065	15.9776	15.404		9.01828	22.1236	14.2513		17.9039	8.96046	22.4484
11.2036	12.6848	15.8757		9.02124	12.1719	13.3864		31	1707.49	2046.92						9.16753	16.5523	14.6341		8.88359	22.2188	14.972		17.549	8.93142	22.1974
10.6146	12.6025	16.3281		9.09955	12.4366	13.9758		32	1554.58	1982.18						9.5955	17.5903	14.8572		8.9834	21.6385	13.8919		17.4941	9.42522	22.579
11.1364	13.3214	15.6785		9.16899	12.0014	13.8607		33	1455.91	2059.63						9.62645	17.6068	15.7349		8.84129	20.1696	14.112		17.1243	8.98869	21.9622
10.8218	12.6896	15.0815		9.67534	11.8324	13.208		34	1578.8	2146.96						8.9621	16.3568	16.2491		9.20126	22.428	13.9858		17.0278	8.87975	23.2877
11.0876	12.8004	16.7042		9.35927	11.4019	13.452		35	1592.95	2295.2						9.42457	16.8116	16.3898		9.06535	23.1273	14.3198		16.8187	8.66737	23.7114
10.4728	12.5589	16.4555		9.25976	12.2687	14.0362		36	1634.74	2217.45						9.16639	16.3949	16.4235		9.01051	22.6024	14.2905		16.2023	9.40073	22.747
10.3247	12.7965	16.7363		9.38845	12.3004	14.4487		37	1831.68	2215.52						9.04694	16.5794	17.1489		9.13762	22.4807	14.3758		16.8466	9.25575	23.1027
11.356	15.0474	17.0569		9.37434	12.262	14.8522		38	1721.13	2152.85						9.3355	15.6106	18.0935		9.0192	19.7924	14.2749		16.0771	8.99819	22.6366
10.4905	15.1331	17.7637		9.84758	11.4601	14.2936		39	1957.88	2058.55						9.60025	16.3288	17.9964		8.83815	18.9447	13.8806		17.6434	9.22617	23.4575
11.852	14.3109	17.4323		9.22489	11.6369	14.1119		40	1845.5	2065.57						8.86472	16.9375	17.1603		9.07581	18.7947	13.4538		16.7406	9.53525	22.6109
11.6904	14.7266	17.8802		9.77396	11.7178	15.0303		41	1922.7	2144.83						10.3069	15.6306	18.0449		8.76931	17.064	14.0876		16.9181	8.92515	22.2874
12.6746	13.4613	17.1037		9.74225	11.6277	13.8283		42	1884.53	2149.67						10.1422	14.5673	18.4437		8.88713	15.5518	13.8739		16.6713	9.09893	22.3152
12.0184	13.3095	16.4223		9.38093	11.626	14.7264		43	1909.9	2304.91						9.98049	17.0305	18.2341		8.78198	16.1469	14.3584		17.0075	9.37418	22.9999
12.0151	15.3131	17.3342		9.42924	11.6933	13.7474		44	1841.55	2253.57						10.5263	16.5867	18.5741		9.36182	14.908	13.6534		17.524	8.89665	22.877
12.004	15.5678	17.1579		8.91831	11.7177	14.1491		45	2001.68	2130.76						10.4223	16.1377	17.6891		8.83635	17.2529	13.4384		18.0203	9.6527	22.506
11.9603	15.6722	17.4624		9.40196	11.6195	14.4796		46	1811.44	2303.51						10.4727	16.9164	18.0046		8.94078	16.7709	13.9335		18.5893	10.0121	21.9963
11.866	15.4363	17.2285		9.7112	11.1576	14.4628		47	1850.05	2334.72						10.2091	16.3689	18.8219		8.77943	17.2316	13.3064		17.9229	8.93688	22.8669
11.2819	17.7303	18.4493		8.98666	11.7881	14.487		48	1857.52	2148.02						10.3466	16.0648	17.9135		9.00943	16.2896	13.9274		18.0393	9.62152	22.3505
11.6382	15.838	17.9655		9.12311	11.6037	14.7602		49	1886.07	2084.74						10.257	17.3774	18.2101		8.72071	16.108	13.7412		18.835	9.37932	21.3261
11.0568	19.0276	17.7786		9.27466	11.4701	14.095		50	1918.99	1912.94						10.0423	17.0306	17.6048		8.80215	15.4903	13.0646		18.1791	9.45936	22.3053
10.8236	18.3167	18.563		9.39627	11.2043	14.1184		51	1896.96	1985.61						10.5898	16.8052	18.502		8.53011	15.8415	12.2983		16.6754	9.08013	21.4106
9.45153	18.9178	18.6981		9.17717	11.7483	14.7865		52	1885.6	1918.3						10.7102	16.5835	17.7383		8.95515	18.1924	12.217		17.5993	8.69007	21.2349
9.82171	18.1101	18.9459		9.00368	12.2606	14.7424		53	2057.74	1931.15						10.3955	16.4884	18.3301		8.72411	18.2095	13.3332		15.6085	8.89348	22.2888
8.79359	19.6797	18.846		8.95592	12.1822	13.6366		54	2018	2050.05						10.6123	16.9291	18.3173		8.83718	15.0138	12.7068		16.4325	9.28791	22.6357
9.2909	18.758	19.7747		9.08963	11.7375	14.2774		55	2004.44	2006.71						10.6904	17.9051	18.2102		8.82149	17.5612	12.566		16.4775	9.89239	23.8403
10.4844	18.2524	19.3603		9.10207	12.0245	13.1592		56	2046.85	2026.54						10.396	18.3723	18.2967		8.79822	15.8706	12.4268		15.9862	9.10934	21.8608
9.89982	16.8876	19.0348		9.65762	12.12	12.8929		57	2045.13	2079.47						10.1581	17.3548	18.2792		8.89273	16.3096	11.7767		16.3163	9.33333	21.7893
10.1083	18.3141	19.5991		9.3321	12.2314	13.2088		58	2080.37	2056.48						10.5166	16.6286	19.2026		8.63996	17.2402	11.9306		15.6285	8.95513	22.237
9.91449	16.7335	19.5181		9.19273	11.6769	13.1506		59	1956.68	1966.16						10.5251	17.6884	18.7516		9.10263	17.7468	11.3123		16.6063	9.20867	23.1349
9.43941	17.5028	20.0573		9.17766	11.4045	13.3715		60	1909.63	2027.67						10.6398	16.5669	18.2863		8.68359	17.4598	11.2724		16.0336	8.90493	22.3749
9.40193	15.8057	18.9468		9.58226	11.4541	13.7642		61	2011.11	2181.42						10.2742	18.8253	17.2614		8.83325	17.6011	11.0196		15.8615	9.41262	23.4763
9.64322	16.1711	19.5806		9.53972	11.5044	12.9171		62	2045.65	2091.1						10.4445	17.1793	17.9827		8.98989	16.5301	11.2789		15.3774	9.60262	22.0957
9.10021	17.2535	19.7702		9.19215	12.2813	13.1507		63	2107.68	2170.61						11.9404	16.2117	18.8535		9.01023	17.0883	10.7444		15.6503	9.1818	21.9432
9.5686	16.5623	19.7276		10.0057	11.3263	13.4118		64	2078.04	2167.34						10.1607	16.5732	18.265		9.05376	16.785	10.9003		15.636	9.6976	22.5798
9.43429	17.5998	18.683		9.52046	11.6379	13.1257		65	2000.61	2123.65						10.3047	17.4845	17.796		8.96679	16.9326	10.4593		15.8066	9.08121	21.8558
9.83979	16.1452	18.5502		9.15396	11.9378	12.9337		66	2083.99	2013.02						10.7901	16.0177	17.1369		8.92158	16.3919	10.4982		15.6211	9.35099	23.7295
9.07328	17.504	18.4913		9.26087	12.0297	12.7521		67	1958.29	2169.58						10.4219	16.6329	17.631		8.86215	17.7355	10.4085		15.7176	9.07057	22.6934
9.68332	15.8299	18.2699		9.55834	12.3471	13.0269		68	2120.15	2067.35						10.8391	16.7173	17.3633		8.88784	17.5141	11.1016		15.7687	8.16041	22.4029
9.5025	17.4687	19.1352		9.11303	11.9879	12.8222		69	1972.19	2186.6						10.6686	18.5376	16.6972		8.81747	16.6134	12.1429		15.875	9.60958	21.6314
9.82068	16.4354	18.7321		9.23308	11.6793	12.8357		70	2031.38	2143.49						10.5382	15.987	18.8153		8.65446	17.2381	11.7398		16.5799	9.09552	22.2165
10.3089	15.931	18.0851		8.64646	11.6373	12.7466		71	2020.87	2023.07						10.6882	17.5719	18.039		8.82865	19.0103	11.9775		16.8406	9.02466	20.8168
9.7836	14.2665	18.3789		8.93955	11.3363	12.6741		72	2169.74	1996.45						9.88944	16.6274	18.5669		8.73677	16.9377	11.7801		16.2269	8.9023	22.0409
10.8887	14.6151	18.031		8.95664	11.9527	13.1074		73	2150.41	2015.57						9.73006	17.9753	18.2601		8.61489	17.7833	11.2368		16.1682	9.269	20.6074
10.8183	14.2834	17.6994		9.17247	11.8055	12.9541		74	2097.22	1998.2						10.3245	17.1713	18.5888		9.18008	16.2183	11.7839		16.926	9.44904	20.7571
10.315	14.7113	19.1321		9.03935	11.7913	13.7432		75	2022.29	2099.85						10.1734	18.2472	18.107		8.96063	15.756	11.5143		16.5178	9.03837	20.9823
10.5933	14.3208	18.8079		8.94353	11.7127	13.1178		76	2116.06	2136.58						10.099	18.2314	18.5248		8.9591	15.7583	11.3833		15.7251	9.08815	22.4537
10.4226	14.5235	18.9896		8.96498	11.6972	13.1774		77	2105.76	2014.01						10.8601	17.0021	18.164		9.25178	16.0541	11.688		17.1756	9.21417	19.6441
10.539	13.771	18.5274		8.65058	11.7517	13.1907		78	2094.95	2142.63						10.8276	16.3414	17.8264		9.21582	15.8698	11.3308		17.4158	9.50001	19.4148
10.5581	14.2741	19.2276		8.90238	11.784	13.2261		79	2019.3	2071.01						10.2755	16.329	17.6381		8.95748	16.1804	10.8762		18.2668	9.45248	20.5016
10.5326	14.1032	18.5426		9.0394	11.7188	13.3383		80	2092.42	2008.93						10.5823	16.2549	18.1124		8.94132	15.4401	11.6707		17.1722	9.53103	20.3105
10.3735	14.1351	19.0997		9.39245	11.7243	12.8053		81	2104.45	2029.3						10.0056	15.8325	17.9653		8.99765	15.1107	11.4915		17.7915	9.32313	20.1619
10.5348	14.441	18.9253		8.93742	11.9799	12.9815		82	2113.8	2029.56						10.7194	15.4987	18.602		8.8651	15.0797	12.0023		18.8201	9.70244	21.6149
10.3006	14.2156	18.7305		8.98251	11.5841	13.3323		83	2121.12	1987.79						10.9146	15.92	18.5573		9.05419	15.2954	11.6571		18.8164	9.17978	21.4863
10.5005	14.1887	19.1841		8.795	11.9411	12.9055		84	2051.59	2036.03						10.8873	15.8042	18.8232		9.20317	15.1309	10.9537		19.5838	9.45244	20.7483
10.2122	14.722	18.9012		8.8088	12.1661	13.1568		85	1980.42	1978.16						9.82444	16.6731	19.2627		9.57054	15.2794	12.1033		18.6282	9.44783	22.0947
10.0945	14.3394	19.0014		9.16803	12.0954	13.3864		86	1930.46	2104.64						10.5798	16.0571	18.4508		9.28281	14.5753	13.1271		17.7562	9.70205	19.8294
10.0566	14.2922	18.5497		8.97013	12.3141	13.4954		87	2136.25	2175.2						11.077	15.8018	18.2579		8.98086	13.8101	13.304		18.2005	9.49846	19.6232
10.5524	14.5097	18.6739		9.04825	12.2225	13.1616		88	2056.61	2151.28						10.8153	16.1512	18.2825		8.93112	13.785	12.1992		18.9861	9.67788	19.7851
10.5879	14.4909	18.5933		9.26333	12.1147	13.847		89	2163.14	2128.3						10.4865	16.0291	17.9109		8.81636	14.115	12.5079		18.602	9.33758	19.4724
10.9367	14.6359	18.9784		9.06714	12.0583	13.5594		90	2159.6	2161.05						9.72582	17.365	18.3284		8.90008	13.9951	11.636		18.7068	9.54739	22.0462
10.6243	15.1585	18.3029		8.98684	11.9782	13.3403		91	2151.17	2093.62						10.6601	16.2464	18.7142		9.01689	14.0723	12.2503		19.5781	9.18851	21.6037
9.85025	15.0342	17.8745		9.66277	12.2003	13.2506		92	2124.97	2092.87						9.89638	16.1255	18.8802		9.05204	14.8559	12.4205		18.2685	8.82834	21.9559
9.95918	14.8757	17.6266		8.85746	12.1242	13.7767		93	2121.64	2040.64						10.3765	16.2974	18.8143		8.86057	14.8516	12.36		18.1401	9.05474	21.1166
10.3197	14.9322	17.9731		8.82663	11.6458	13.2392		94	2232.04	2065.39						10.7868	16.4277	18.0259		8.76306	15.2408	11.6756		17.1911	8.76122	20.9406
10.0063	15.4488	18.343		8.99495	11.532	13.6072		95	2119.85	1942.7						10.2901	16.1083	17.4677		9.11749	15.163	11.1005		18.4406	9.04437	19.4286
10.1074	14.4465	18.1628		8.62864	11.5321	13.4335		96	2164.05	2049.95						10.0849	16.73	17.5164		8.89933	15.0704	11.2763		18.5837	9.00876	20.6643
10.2071	14.5333	17.6064		9.08349	11.2708	13.4892		97	2124.92	2037.23						11.2593	16.5698	17.0602		8.91187	14.811	12.3141		18.0494	9.22856	21.0748
10.3418	14.4177	18.2488		8.80611	11.5135	13.5438		98	2089.12	1954.61						10.3194	16.4968	18.1952		9.11318	14.8949	11.231		18.3185	9.43154	20.482
9.64924	15.4662	17.9649		9.06264	11.4293	14.6965		99	2139.47	1881.44						10.8654	17.1139	17.899		9.19713	14.7973	11.2289		18.3874	9.7922	20.8328
10.0041	14.609	17.5181		8.98074	11.9075	14.4411		100	2133.79	2048.37						10.6537	17.3659	17.7027		9.03194	14.801	11.4555		18.5509	9.57851	21.7377
								101	2092.29	2144.22
								102	2099.95	2114.42
								103	2215.76	2034.01
								104	2172.82	2064.22
								105	2229.87	2090.83
								106	2110.15	2157.86
								107	2219.47	2089.88
								108	2227.03	2189.87
								109	2152.64	2066.43
								110	2170.89	2129.05
								111	2212.05	2164.44
								112	2199.54	2093.81
								113	2226.03	2067.45
								114	2164.97	2097.29
								115	2261.45	2101.38
								116	2339.77	2113.62
								117	2272.03	2181.78
								118	2207.46	2086.05
								119	2164.18	2155.29
								120	2270.84	2238.11
								121	2204.49	1992.59
								122	2288.76	2151.74
								123	2244.3	2147.93
								124	2202.94	2086.13
								125	2421.09	2063.38

## Sheet: Figure 3F
	WT	Rep1	Rep2	Rep3	% Rep 1	% Rep 2	% Rep 3	Avg	St. Dev			Cbk1 Delete	Rep1	Rep2	Rep3	% Rep 1	% Rep 2	% Rep 3	Avg	St. Dev
Group Size	1 to 4	122	200	167	90.3704	92.1659	92.7778	91.7713	1.25126		Group Size	1 to 4	7	26	16	5.46875	18.8406	16	13.4364	7.04488
	5 to 10	11	17	13	8.14815	7.8341	7.22222	7.73482	0.470879			5 to 10	24	38	24	18.75	27.5362	24	23.4287	4.42088
	11 to 20	2	0	0	1.48148	0	0	0.493827	0.855334			11 to 20	55	55	30	42.9688	39.8551	30	37.6079	6.7701
	21+	0	0	0	0	0	0	0	0			21+	42	19	30	32.8125	13.7681	30	25.5269	10.28
	Total per rep	135	217	180								Total N per rep	128	138	100
	E314R	Rep1	Rep2	Rep3	% Rep 1	% Rep 2	% Rep 3	Avg	St. Dev			R307E	Rep1	Rep2	Rep3	% Rep 1	% Rep 2	% Rep 3	Avg	St. Dev
Group Size	1 to 4	63	45	70	43.4483	38.7931	41.6667	41.3027	2.34883		Group Size	1 to 4	24	12	40	17.7778	11.7647	27.972	19.1715	8.19306
	5 to 10	61	59	53	42.069	50.8621	31.5476	41.4929	9.6701			5 to 10	24	14	34	17.7778	13.7255	23.7762	18.4265	5.05667
	11 to 20	19	12	34	13.1034	10.3448	20.2381	14.5621	5.10539			11 to 20	32	22	44	23.7037	21.5686	30.7692	25.3472	4.81545
	21+	2	0	11	1.37931	0	6.54762	2.64231	3.4517			21+	55	54	25	40.7407	52.9412	17.4825	37.0548	18.0144
	Total N per rep	145	116	168								Total N per rep	135	102	143
	R746E	Rep1	Rep2	Rep3	% Rep 1	% Rep 2	% Rep 3	Avg	St. Dev			T743R	Rep1	Rep2	Rep3	% Rep 1	% Rep 2	% Rep 3	Avg	St. Dev
Group Size	1 to 4	58	20	23	26.9767	17.5439	19.8276	21.4494	4.92113		Group Size	1 to 4	29	18	18	18.9542	19.1489	16.6667	18.2566	1.38037
	5 to 10	39	16	38	18.1395	14.0351	32.7586	21.6444	9.84153			5 to 10	37	11	20	24.183	11.7021	18.5185	18.1346	6.24929
	11 to 20	57	26	26	26.5116	22.807	22.4138	23.9108	2.26094			11 to 20	40	17	27	26.1438	18.0851	25	23.0763	4.36017
	21+	61	52	29	28.3721	45.614	25	32.9954	11.0574			21+	47	48	43	30.719	51.0638	39.8148	40.5325	10.1914
	Total N per rep	215	114	116								Total N per rep	153	94	108
	E314R/R746E	Rep1	Rep2	Rep3	% Rep 1	% Rep 2	% Rep 3	Avg	St. Dev			R307E/T746E	Rep1	Rep2	Rep3	% Rep 1	% Rep 2	% Rep 3	Avg	St. Dev
Group Size	1 to 4	107	91	79	59.4444	55.1515	44.8864	53.1608	7.48042		Group Size	1 to 4	42	47	38	38.8889	32.6389	31.9328	34.4869	3.82859
	5 to 10	50	53	51	27.7778	32.1212	28.9773	29.6254	2.24308			5 to 10	18	39	33	16.6667	27.0833	27.7311	23.827	6.20951
	11 to 20	21	19	33	11.6667	11.5152	18.75	13.9773	4.134			11 to 20	27	41	26	25	28.4722	21.8487	25.107	3.31304
	21+	2	2	13	1.11111	1.21212	7.38636	3.23653	3.59421			21+	21	17	22	19.4444	11.8056	18.4874	16.5791	4.16164
	Total N per rep	180	165	176								Total N per rep	108	144	119
