# Supplementary material for: The Structure of an NDR/LATS Kinase–Mob Complex Reveals a Novel Kinase–Coactivator System and Substrate Docking Mechanism
Source: PLoS Biol. 2015 May 12;13(5):e1002146. doi: 10.1371/journal.pbio.1002146 (PMC4428629; doi:10.1371/journal.pbio.1002146)
Supplement: S6 Data — This file lists proteins in which Cbk1 phosphorylation consensus and core docking motif sequences are significantly conserved, as well as proteins in which one but not the other of these two sequence motifs is significantly conserved. (XLSX) [file pbio.1002146.s006.xlsx]

## Sheet: Sheet1
NAME	ID	ConDens score for phos.	ConDens score for dock.		NAME	ID	ConDens score for phos.	ConDens score for dock.		NAME	ID	ConDens score for phos.	ConDens score for dock.
YBL085W BOI1 SGDID:S0000181, Chr II from 63873-66815, Verified ORF	YBL085W	41.4772	11.1985		YER008C SEC3 SGDID:S0000810, Chr V from 171817-167807, reverse complement, Verified ORF	YER008C	23.2918	-100		YHR061C GIC1 SGDID:S0001103, Chr VIII from 222479-221535, reverse complement, Verified ORF	YHR061C	-100	12.4304
YDR293C SSD1 SGDID:S0002701, Chr IV from 1049386-1045634, reverse complement, Verified ORF	YDR293C	18.885	14.2261		YGL178W MPT5 SGDID:S0003146, Chr VII from 167358-167360,168001-170577, Verified ORF	YGL178W	14.7617	-100		YER075C PTP3 SGDID:S0000877, Chr V from 311195-308409, reverse complement, Verified ORF	YER075C	-100	11.4471
YBR007C DSF2 SGDID:S0000211, Chr II from 251017-248807, reverse complement, Uncharacterized ORF	YBR007C	14.5474	0.439952		YDR122W KIN1 SGDID:S0002529, Chr IV from 694695-697889, Verified ORF	YDR122W	10.3328	-100		YHL009C YAP3 SGDID:S0001001, Chr VIII from 85055-84063, reverse complement, Verified ORF	YHL009C	-100	11.1647
YER032W FIR1 SGDID:S0000834, Chr V from 215062-217692, Verified ORF	YER032W	9.83478	15.0497		YGR117C YGR117C SGDID:S0003349, Chr VII from 726483-725053, reverse complement, Uncharacterized ORF	YGR117C	9.84973	-100		YNR006W VPS27 SGDID:S0005289, Chr XIV from 636986-638854, Verified ORF	YNR006W	-100	9.25688
YJL051W YJL051W SGDID:S0003587, Chr X from 339703-342171, Uncharacterized ORF	YJL051W	9.40892	9.52439		YLR096W KIN2 SGDID:S0004086, Chr XII from 332591-336034, Verified ORF	YLR096W	9.22276	-100		YKL072W STB6 SGDID:S0001555, Chr XI from 299227-301527, Verified ORF	YKL072W	-100	6.84358
YLR131C ACE2 SGDID:S0004121, Chr XII from 406823-404511, reverse complement, Verified ORF	YLR131C	8.55401	4.27817		YDR239C YDR239C SGDID:S0002647, Chr IV from 943414-941051, reverse complement, Uncharacterized ORF	YDR239C	8.11436	-100		YHL029C YHL029C SGDID:S0001021, Chr VIII from 47966-45927, reverse complement, Uncharacterized ORF	YHL029C	-100	5.61099
YNL042W BOP3 SGDID:S0004987, Chr XIV from 548099-549289, Uncharacterized ORF	YNL042W	7.5879	13.2499		YJL016W YJL016W SGDID:S0003553, Chr X from 405504-407189, Uncharacterized ORF	YJL016W	7.98205	-100		YLR117C CLF1 SGDID:S0004107, Chr XII from 384535-382472, reverse complement, Verified ORF	YLR117C	-100	5.59668
YJR091C JSN1 SGDID:S0003851, Chr X from 598250-594975, reverse complement, Verified ORF	YJR091C	6.54953	0.00125355		YIL122W POG1 SGDID:S0001384, Chr IX from 130607-131662, Verified ORF	YIL122W	7.72214	-100		YMR053C STB2 SGDID:S0004657, Chr XIII from 382897-380345, reverse complement, Verified ORF	YMR053C	-100	5.59229
YOR093C YOR093C SGDID:S0005619, Chr XV from 502452-497506, reverse complement, Uncharacterized ORF	YOR093C	4.48767	0.0379259		YDR379W RGA2 SGDID:S0002787, Chr IV from 1230157-1233186, Verified ORF	YDR379W	6.16885	-100		YGR212W SLI1 SGDID:S0003444, Chr VII from 917045-918451, Uncharacterized ORF	YGR212W	-100	5.2271
YML109W ZDS2 SGDID:S0004577, Chr XIII from 51640-54468, Verified ORF	YML109W	2.94984	0.480425		YNL058C YNL058C SGDID:S0005003, Chr XIV from 516712-515762, reverse complement, Uncharacterized ORF	YNL058C	6.03772	-100		YLR446W YLR446W SGDID:S0004438, Chr XII from 1025210-1026511, Uncharacterized ORF	YLR446W	-100	4.63429
YPL141C YPL141C SGDID:S0006062, Chr XVI from 286060-283463, reverse complement, Uncharacterized ORF	YPL141C	2.06038	1.31201e-11		YFL042C YFL042C SGDID:S0001852, Chr VI from 47744-45720, reverse complement, Uncharacterized ORF	YFL042C	6.02794	-100		YNL050C YNL050C SGDID:S0004995, Chr XIV from 534981-534965,534873-534078, reverse complement, Uncharacterized ORF	YNL050C	-100	4.43732
YML016C PPZ1 SGDID:S0004478, Chr XIII from 241536-239458, reverse complement, Verified ORF	YML016C	1.77077	0.00974511		YDR528W HLR1 SGDID:S0002936, Chr IV from 1494576-1495847, Verified ORF	YDR528W	5.54839	-100		YJR019C TES1 SGDID:S0003780, Chr X from 468195-467146, reverse complement, Verified ORF	YJR019C	-100	4.33608
YDR338C YDR338C SGDID:S0002746, Chr IV from 1149458-1147371, reverse complement, Uncharacterized ORF	YDR338C	1.37203	0.00435239		YDL109C YDL109C SGDID:S0002267, Chr IV from 267201-265258, reverse complement, Uncharacterized ORF	YDL109C	5.43431	-100		YOL013C HRD1 SGDID:S0005373, Chr XV from 303035-301380, reverse complement, Verified ORF	YOL013C	-100	4.13998
YNL139C RLR1 SGDID:S0005083, Chr XIV from 365717-360924, reverse complement, Verified ORF	YNL139C	1.18646	0.831627		YDR170C SEC7 SGDID:S0002577, Chr IV from 802217-796188, reverse complement, Verified ORF	YDR170C	5.36798	-100		YGL104C VPS73 SGDID:S0003072, Chr VII from 310176-308716, reverse complement, Verified ORF	YGL104C	-100	3.98197
YMR273C ZDS1 SGDID:S0004886, Chr XIII from 813979-811232, reverse complement, Verified ORF	YMR273C	1.04759	0.16766		YDR150W NUM1 SGDID:S0002557, Chr IV from 755623-763869, Verified ORF	YDR150W	5.27662	-100		YOL068C HST1 SGDID:S0005429, Chr XV from 201878-200367, reverse complement, Verified ORF	YOL068C	-100	3.72215
YIL129C TAO3 SGDID:S0001391, Chr IX from 113237-106107, reverse complement, Verified ORF	YIL129C	1.0457	16.0231		YKR089C STC1 SGDID:S0001797, Chr XI from 608007-605275, reverse complement, Uncharacterized ORF	YKR089C	5.13805	-100		YCL045C YCL045C SGDID:S0000550, Chr III from 46905-44623, reverse complement, Uncharacterized ORF	YCL045C	-100	3.12277
YFL007W BLM3 SGDID:S0001887, Chr VI from 123474-129905, Verified ORF	YFL007W	1.0109	0.0620204		YBR133C HSL7 SGDID:S0000337, Chr II from 504281-501798, reverse complement, Verified ORF	YBR133C	5.12598	-100		YPL085W SEC16 SGDID:S0006006, Chr XVI from 387064-393651, Verified ORF	YPL085W	-100	2.97761
YGR271W SLH1 SGDID:S0003503, Chr VII from 1031797-1037700, Verified ORF	YGR271W	0.972265	0.000111655		YNL101W AVT4 SGDID:S0005045, Chr XIV from 434999-437140, Verified ORF	YNL101W	4.50873	-100		YIL101C XBP1 SGDID:S0001363, Chr IX from 177247-175304, reverse complement, Verified ORF	YIL101C	-100	2.93289
YMR154C RIM13 SGDID:S0004763, Chr XIII from 568181-565998, reverse complement, Verified ORF	YMR154C	0.969979	0		YBR255W YBR255W SGDID:S0000459, Chr II from 724451-726535, Uncharacterized ORF	YBR255W	3.94334	-100		YHR004C NEM1 SGDID:S0001046, Chr VIII from 113088-111748, reverse complement, Verified ORF	YHR004C	-100	2.81544
YLR106C MDN1 SGDID:S0004096, Chr XII from 363739-349007, reverse complement, Verified ORF	YLR106C	0.96437	0		YER033C ZRG8 SGDID:S0000835, Chr V from 221286-218056, reverse complement, Verified ORF	YER033C	3.90474	-100		YDL238C GUD1 SGDID:S0002397, Chr IV from 30454-28985, reverse complement, Uncharacterized ORF	YDL238C	-100	2.61697
YGR116W SPT6 SGDID:S0003348, Chr VII from 720413-724768, Verified ORF	YGR116W	0.872902	0.0052893		YLR020C YLR020C SGDID:S0004010, Chr XII from 183404-181788, reverse complement, Uncharacterized ORF	YLR020C	3.54123	-100		YGR048W UFD1 SGDID:S0003280, Chr VII from 589830-590915, Verified ORF	YGR048W	-100	2.54085
YPR189W SKI3 SGDID:S0006393, Chr XVI from 912660-916958, Verified ORF	YPR189W	0.611513	3.25335		YEL043W YEL043W SGDID:S0000769, Chr V from 70478-73348, Uncharacterized ORF	YEL043W	3.09846	-100		YJL208C NUC1 SGDID:S0003744, Chr X from 41183-40194, reverse complement, Verified ORF	YJL208C	-100	2.46888
YLR305C STT4 SGDID:S0004296, Chr XII from 743865-738163, reverse complement, Verified ORF	YLR305C	0.356113	2.71784e-05		YFL002C SPB4 SGDID:S0001894, Chr VI from 146929-145109, reverse complement, Verified ORF	YFL002C	3.08891	-100		YMR160W YMR160W SGDID:S0004770, Chr XIII from 575065-577515, Uncharacterized ORF	YMR160W	-100	2.38419
YOR018W ROD1 SGDID:S0005544, Chr XV from 364368-366881, Verified ORF	YOR018W	0.247442	1.55701		YOL128C YGK3 SGDID:S0005488, Chr XV from 79478-78351, reverse complement, Verified ORF	YOL128C	2.92129	-100		YER051W YER051W SGDID:S0000853, Chr V from 254655-256133, Uncharacterized ORF	YER051W	-100	2.33966
YIL096C YIL096C SGDID:S0001358, Chr IX from 183124-182114, reverse complement, Uncharacterized ORF	YIL096C	0.228101	1.38634		YNL271C BNI1 SGDID:S0005215, Chr XIV from 135382-129521, reverse complement, Verified ORF	YNL271C	2.89232	-100		YIL147C SLN1 SGDID:S0001409, Chr IX from 73453-69791, reverse complement, Verified ORF	YIL147C	-100	2.18778
YPL230W YPL230W SGDID:S0006151, Chr XVI from 115312-116487, Uncharacterized ORF	YPL230W	0.224199	0		YGL139W YGL139W SGDID:S0003107, Chr VII from 245721-248129, Uncharacterized ORF	YGL139W	2.77471	-100		YLR118C YLR118C SGDID:S0004108, Chr XII from 385409-384726, reverse complement, Uncharacterized ORF	YLR118C	-100	2.06435
YBR023C CHS3 SGDID:S0000227, Chr II from 287925-284428, reverse complement, Verified ORF	YBR023C	0.186647	0.000238686		YDR264C AKR1 SGDID:S0002672, Chr IV from 998317-996023, reverse complement, Verified ORF	YDR264C	2.74631	-100		YML082W YML082W SGDID:S0004547, Chr XIII from 101862-103811, Uncharacterized ORF	YML082W	-100	1.93336
YKR091W SRL3 SGDID:S0001799, Chr XI from 611167-611907, Verified ORF	YKR091W	0.159945	0		YBR234C ARC40 SGDID:S0000438, Chr II from 686587-685433, reverse complement, Verified ORF	YBR234C	2.72636	-100		YBR241C YBR241C SGDID:S0000445, Chr II from 704050-702584, reverse complement, Uncharacterized ORF	YBR241C	-100	1.72715
YOL075C YOL075C SGDID:S0005435, Chr XV from 193541-189657, reverse complement, Uncharacterized ORF	YOL075C	0.148049	0.687396		YOR269W PAC1 SGDID:S0005795, Chr XV from 826382-827866, Verified ORF	YOR269W	2.71166	-100		YNL103W MET4 SGDID:S0005047, Chr XIV from 427735-429753, Verified ORF	YNL103W	-100	1.69232
YGR250C YGR250C SGDID:S0003482, Chr VII from 993526-991181, reverse complement, Uncharacterized ORF	YGR250C	0.13763	3.69515		YOR023C AHC1 SGDID:S0005549, Chr XV from 377711-376011, reverse complement, Verified ORF	YOR023C	2.70345	-100		YJR130C STR2 SGDID:S0003891, Chr X from 667052-665133, reverse complement, Verified ORF	YJR130C	-100	1.64917
YMR278W YMR278W SGDID:S0004891, Chr XIII from 822762-824630, Uncharacterized ORF	YMR278W	0.130567	0.00341599		YNR014W YNR014W SGDID:S0005297, Chr XIV from 652465-653103, Uncharacterized ORF	YNR014W	2.53578	-100		YER182W FMP10 SGDID:S0000984, Chr V from 552520-553254, Uncharacterized ORF	YER182W	-100	1.60505
YGR089W NNF2 SGDID:S0003321, Chr VII from 656964-659774, Uncharacterized ORF	YGR089W	0.100606	0.188729		YBR102C EXO84 SGDID:S0000306, Chr II from 447317-445056, reverse complement, Verified ORF	YBR102C	2.53566	-100		YGL095C VPS45 SGDID:S0003063, Chr VII from 330610-328877, reverse complement, Verified ORF	YGL095C	-100	1.5805
YJL094C KHA1 SGDID:S0003630, Chr X from 254358-251737, reverse complement, Verified ORF	YJL094C	0.0956286	9.86947e-05		YOR077W RTS2 SGDID:S0005603, Chr XV from 471900-472598, Verified ORF	YOR077W	2.31754	-100		YOR273C TPO4 SGDID:S0005799, Chr XV from 836428-834449, reverse complement, Verified ORF	YOR273C	-100	1.57948
YER086W ILV1 SGDID:S0000888, Chr V from 328473-330203, Verified ORF	YER086W	0.0691476	0.00684433		YJL056C ZAP1 SGDID:S0003592, Chr X from 332989-330347, reverse complement, Verified ORF	YJL056C	2.00995	-100		YLR451W LEU3 SGDID:S0004443, Chr XII from 1036089-1038749, Verified ORF	YLR451W	-100	1.57424
YPR042C PUF2 SGDID:S0006246, Chr XVI from 653659-650432, reverse complement, Verified ORF	YPR042C	0.0437347	0.0501997		YDL167C NRP1 SGDID:S0002326, Chr IV from 163155-160996, reverse complement, Verified ORF	YDL167C	1.96432	-100		YER158C YER158C SGDID:S0000960, Chr V from 490573-488852, reverse complement, Uncharacterized ORF	YER158C	-100	1.53018
YBL017C PEP1 SGDID:S0000113, Chr II from 191586-186847, reverse complement, Verified ORF	YBL017C	0.0179169	3.09942e-05		YKL185W ASH1 SGDID:S0001668, Chr XI from 94504-96270, Verified ORF	YKL185W	1.96166	-100		YHR164C DNA2 SGDID:S0001207, Chr VIII from 429179-424611, reverse complement, Verified ORF	YHR164C	-100	1.51087
YHR099W TRA1 SGDID:S0001141, Chr VIII from 302763-313997, Verified ORF	YHR099W	0.0153083	0.284443		YOL041C NOP12 SGDID:S0005401, Chr XV from 252644-251265, reverse complement, Verified ORF	YOL041C	1.94591	-100		YGL142C GPI10 SGDID:S0003110, Chr VII from 238124-236274, reverse complement, Verified ORF	YGL142C	-100	1.39115
YOR335C ALA1 SGDID:S0005862, Chr XV from 949104-946228, reverse complement, Verified ORF	YOR335C	0.0151842	0.00721699		YKR031C SPO14 SGDID:S0001739, Chr XI from 506037-500986, reverse complement, Verified ORF	YKR031C	1.90704	-100		YMR097C MTG1 SGDID:S0004703, Chr XIII from 460526-459423, reverse complement, Verified ORF	YMR097C	-100	1.3906
YIL075C RPN2 SGDID:S0001337, Chr IX from 220697-217860, reverse complement, Verified ORF	YIL075C	0.0103572	0.131865		YGR021W YGR021W SGDID:S0003253, Chr VII from 527636-528508, Uncharacterized ORF	YGR021W	1.80842	-100		YLR127C APC2 SGDID:S0004117, Chr XII from 398320-395759, reverse complement, Verified ORF	YLR127C	-100	1.32951
YFL034W YFL034W SGDID:S0001860, Chr VI from 65475-68696, Uncharacterized ORF	YFL034W	0.00215566	0.149533		YBR001C NTH2 SGDID:S0000205, Chr II from 241285-238943, reverse complement, Verified ORF	YBR001C	1.75832	-100		YDR358W GGA1 SGDID:S0002766, Chr IV from 1190050-1191723, Verified ORF	YDR358W	-100	1.29273
YCR032W BPH1 SGDID:S0000628, Chr III from 179515-186018, Verified ORF	YCR032W	0.00177076	0.032543		YKR100C SKG1 SGDID:S0001808, Chr XI from 639606-638539, reverse complement, Uncharacterized ORF	YKR100C	1.74523	-100		YOR181W LAS17 SGDID:S0005707, Chr XV from 675939-677840, Verified ORF	YOR181W	-100	1.28067
YPL050C MNN9 SGDID:S0005971, Chr XVI from 461963-460776, reverse complement, Verified ORF	YPL050C	0.000716261	0.183304		YGR097W ASK10 SGDID:S0003329, Chr VII from 678699-682139, Verified ORF	YGR097W	1.63256	-100		YGL221C NIF3 SGDID:S0003189, Chr VII from 82291-81425, reverse complement, Verified ORF	YGL221C	-100	1.26094
YFR022W YFR022W SGDID:S0001918, Chr VI from 196821-199022, Uncharacterized ORF	YFR022W	0.000518718	0.801327		YKL040C NFU1 SGDID:S0001523, Chr XI from 361472-360702, reverse complement, Verified ORF	YKL040C	1.61698	-100		YPL158C YPL158C SGDID:S0006079, Chr XVI from 254309-252033, reverse complement, Uncharacterized ORF	YPL158C	-100	1.22728
YPR117W YPR117W SGDID:S0006321, Chr XVI from 760023-767492, Uncharacterized ORF	YPR117W	6.99977e-05	4.20173		YGL191W COX13 SGDID:S0003159, Chr VII from 144814-145203, Verified ORF	YGL191W	1.59858	-100		YOL129W VPS68 SGDID:S0005489, Chr XV from 77559-78113, Verified ORF	YOL129W	-100	1.19699
YMR266W RSN1 SGDID:S0004879, Chr XIII from 798517-801378, Uncharacterized ORF	YMR266W	5.38393e-05	0.0202117		YER114C BOI2 SGDID:S0000916, Chr V from 393708-390586, reverse complement, Verified ORF	YER114C	1.55233	-100		YLR191W PEX13 SGDID:S0004181, Chr XII from 537274-538434, Verified ORF	YLR191W	-100	1.13525
YCR023C YCR023C SGDID:S0000617, Chr III from 160368-158533, reverse complement, Uncharacterized ORF	YCR023C	1.5927e-05	0.590065		YJL095W BCK1 SGDID:S0003631, Chr X from 247171-251607, Verified ORF	YJL095W	1.5211	-100		YOR112W YOR112W SGDID:S0005638, Chr XV from 531508-533793, Uncharacterized ORF	YOR112W	-100	1.11706
YPR115W YPR115W SGDID:S0006319, Chr XVI from 754875-758126, Uncharacterized ORF	YPR115W	1.15165e-06	1.91112e-07		YDR011W SNQ2 SGDID:S0002418, Chr IV from 465916-470421, Verified ORF	YDR011W	1.47551	-100		YJR102C VPS25 SGDID:S0003863, Chr X from 619679-619071, reverse complement, Verified ORF	YJR102C	-100	1.10083
YLR228C ECM22 SGDID:S0004218, Chr XII from 602465-600021, reverse complement, Verified ORF	YLR228C	8.74647e-08	0.0101286		YOL102C TPT1 SGDID:S0005462, Chr XV from 126688-125996, reverse complement, Verified ORF	YOL102C	1.47328	-100		YNL165W YNL165W SGDID:S0005109, Chr XIV from 323832-325052, Uncharacterized ORF	YNL165W	-100	0.973454
YDL112W TRM3 SGDID:S0002270, Chr IV from 258915-263225, Verified ORF	YDL112W	2.26498e-08	0.0732528		YER172C BRR2 SGDID:S0000974, Chr V from 536016-529525, reverse complement, Verified ORF	YER172C	1.43321	-100		YDL027C YDL027C SGDID:S0002185, Chr IV from 404954-403692, reverse complement, Uncharacterized ORF	YDL027C	-100	0.91018
YLR454W FMP27 SGDID:S0004446, Chr XII from 1043995-1051881, Uncharacterized ORF	YLR454W	2.26054e-08	0.998219		YFR007W YFR007W SGDID:S0001903, Chr VI from 159293-160354, Uncharacterized ORF	YFR007W	1.29315	-100		YMR147W YMR147W SGDID:S0004755, Chr XIII from 559198-559869, Uncharacterized ORF	YMR147W	-100	0.864741
YLR368W MDM30 SGDID:S0004360, Chr XII from 857539-859335, Verified ORF	YLR368W	1.38035e-09	4.41625e-11		YNL251C NRD1 SGDID:S0005195, Chr XIV from 174314-172587, reverse complement, Verified ORF	YNL251C	1.23894	-100		YER049W YER049W SGDID:S0000851, Chr V from 251727-253661, Uncharacterized ORF	YER049W	-100	0.836582
YLR089C ALT1 SGDID:S0004079, Chr XII from 320016-318238, reverse complement, Uncharacterized ORF	YLR089C	1.35998e-09	0.596505		YOL078W AVO1 SGDID:S0005438, Chr XV from 181681-185211, Verified ORF	YOL078W	1.23293	-100		YGR010W NMA2 SGDID:S0003242, Chr VII from 511549-512736, Verified ORF	YGR010W	-100	0.783864
YCR081W SRB8 SGDID:S0000677, Chr III from 254367-258650, Verified ORF	YCR081W	2.59759e-12	0.795881		YMR206W YMR206W SGDID:S0004819, Chr XIII from 675895-676836, Uncharacterized ORF	YMR206W	1.22019	-100		YMR207C HFA1 SGDID:S0004820, Chr XIII from 683563-677192, reverse complement, Verified ORF	YMR207C	-100	0.759847
YCR093W CDC39 SGDID:S0000689, Chr III from 280113-286439, Verified ORF	YCR093W	1.10278e-12	3.75748e-07		YNL010W YNL010W SGDID:S0004955, Chr XIV from 613634-614359, Uncharacterized ORF	YNL010W	1.16938	-100		YKR082W NUP133 SGDID:S0001790, Chr XI from 592467-595940, Verified ORF	YKR082W	-100	0.757702
YDR217C RAD9 SGDID:S0002625, Chr IV from 903474-899545, reverse complement, Verified ORF	YDR217C	5.4734e-14	5.76991e-06		YDL127W PCL2 SGDID:S0002285, Chr IV from 234927-235853, Verified ORF	YDL127W	1.15788	-100		YNL219C ALG9 SGDID:S0005163, Chr XIV from 237662-235995, reverse complement, Verified ORF	YNL219C	-100	0.703198
YDR213W UPC2 SGDID:S0002621, Chr IV from 889746-892487, Verified ORF	YDR213W	3.11973e-14	0.00367443		YMR092C AIP1 SGDID:S0004698, Chr XIII from 453478-451631, reverse complement, Verified ORF	YMR092C	1.15713	-100		YML091C RPM2 SGDID:S0004556, Chr XIII from 90731-87123, reverse complement, Verified ORF	YML091C	-100	0.698586
YBL079W NUP170 SGDID:S0000175, Chr II from 75256-79764, Verified ORF	YBL079W	1.54321e-14	1.07408		YPL221W BOP1 SGDID:S0006142, Chr XVI from 133042-135423, Uncharacterized ORF	YPL221W	1.12983	-100		YDR111C ALT2 SGDID:S0002518, Chr IV from 679759-678236, reverse complement, Uncharacterized ORF	YDR111C	-100	0.696972
YDR409W SIZ1 SGDID:S0002817, Chr IV from 1289396-1292110, Verified ORF	YDR409W	9.99201e-16	1.11022e-16		YJL109C UTP10 SGDID:S0003645, Chr X from 217226-211917, reverse complement, Verified ORF	YJL109C	1.05478	-100		YJL149W YJL149W SGDID:S0003685, Chr X from 137297-139288, Uncharacterized ORF	YJL149W	-100	0.695167
YBR157C ICS2 SGDID:S0000361, Chr II from 554304-553537, reverse complement, Verified ORF	YBR157C	0	10.5276		YCL051W LRE1 SGDID:S0000556, Chr III from 35865-37616, Verified ORF	YCL051W	1.01438	-100		YHL032C GUT1 SGDID:S0001024, Chr VIII from 38506-36377, reverse complement, Verified ORF	YHL032C	-100	0.692883
YMR137C PSO2 SGDID:S0004745, Chr XIII from 544962-542977, reverse complement, Verified ORF	YMR137C	0	8.83159		YMR280C CAT8 SGDID:S0004893, Chr XIII from 831328-827027, reverse complement, Verified ORF	YMR280C	1.00444	-100		YLR017W MEU1 SGDID:S0004007, Chr XII from 177607-178620, Verified ORF	YLR017W	-100	0.668981
YDR309C GIC2 SGDID:S0002717, Chr IV from 1080193-1079042, reverse complement, Verified ORF	YDR309C	0	5.15433		YOL070C YOL070C SGDID:S0005431, Chr XV from 198724-197219, reverse complement, Uncharacterized ORF	YOL070C	0.944951	-100		YOL107W YOL107W SGDID:S0005467, Chr XV from 112101-113129, Uncharacterized ORF	YOL107W	-100	0.600798
YML031W NDC1 SGDID:S0004493, Chr XIII from 214189-216156, Verified ORF	YML031W	0	4.2663		YIL095W PRK1 SGDID:S0001357, Chr IX from 183934-186366, Verified ORF	YIL095W	0.881791	-100		YMR110C YMR110C SGDID:S0004716, Chr XIII from 491991-490393, reverse complement, Uncharacterized ORF	YMR110C	-100	0.593271
YKL157W APE2 SGDID:S0001640, Chr XI from 154996-155276,155660-158186, Verified ORF	YKL157W	0	4.09293		YOR086C TCB1 SGDID:S0005612, Chr XV from 486780-483220, reverse complement, Verified ORF	YOR086C	0.875869	-100		YJR100C YJR100C SGDID:S0003861, Chr X from 617248-616265, reverse complement, Uncharacterized ORF	YJR100C	-100	0.579014
YDR085C AFR1 SGDID:S0002492, Chr IV from 616145-614283, reverse complement, Verified ORF	YDR085C	0	3.15011		YER003C PMI40 SGDID:S0000805, Chr V from 159117-159087,158993-157735, reverse complement, Verified ORF	YER003C	0.846518	-100		YDL044C MTF2 SGDID:S0002202, Chr IV from 375286-373964, reverse complement, Verified ORF	YDL044C	-100	0.524568
YOL052C SPE2 SGDID:S0005412, Chr XV from 233634-232444, reverse complement, Verified ORF	YOL052C	0	1.97969		YHR091C MSR1 SGDID:S0001133, Chr VIII from 286771-284840, reverse complement, Verified ORF	YHR091C	0.781751	-100		YOR037W CYC2 SGDID:S0005563, Chr XV from 401554-402654, Verified ORF	YOR037W	-100	0.515127
YGR099W TEL2 SGDID:S0003331, Chr VII from 687903-689969, Verified ORF	YGR099W	0	1.30915		YDR017C KCS1 SGDID:S0002424, Chr IV from 482263-479111, reverse complement, Verified ORF	YDR017C	0.768777	-100		YLR387C REH1 SGDID:S0004379, Chr XII from 897672-896374, reverse complement, Verified ORF	YLR387C	-100	0.483442
YLR023C IZH3 SGDID:S0004013, Chr XII from 187128-185497, reverse complement, Verified ORF	YLR023C	0	0.419625		YFL033C RIM15 SGDID:S0001861, Chr VI from 74425-69113, reverse complement, Verified ORF	YFL033C	0.743881	-100		YMR293C YMR293C SGDID:S0004907, Chr XIII from 856792-855398, reverse complement, Uncharacterized ORF	YMR293C	-100	0.453664
YIL015W BAR1 SGDID:S0001277, Chr IX from 322340-324103, Verified ORF	YIL015W	0	0.192088		YNL317W PFS2 SGDID:S0005261, Chr XIV from 40618-42015, Verified ORF	YNL317W	0.729089	-100		YKR080W MTD1 SGDID:S0001788, Chr XI from 590037-590999, Verified ORF	YKR080W	-100	0.450748
YPR159W KRE6 SGDID:S0006363, Chr XVI from 857579-859741, Verified ORF	YPR159W	0	0.0483078		YBL061C SKT5 SGDID:S0000157, Chr II from 107408-105318, reverse complement, Verified ORF	YBL061C	0.699852	-100		YKL010C UFD4 SGDID:S0001493, Chr XI from 425518-421067, reverse complement, Verified ORF	YKL010C	-100	0.428176
YOR373W NUD1 SGDID:S0005900, Chr XV from 1036830-1039385, Verified ORF	YOR373W	0	0.0224331		YML072C TCB3 SGDID:S0004537, Chr XIII from 129367-124730, reverse complement, Verified ORF	YML072C	0.692657	-100		YMR001C CDC5 SGDID:S0004603, Chr XIII from 271136-269019, reverse complement, Verified ORF	YMR001C	-100	0.396936
YER017C AFG3 SGDID:S0000819, Chr V from 191787-189502, reverse complement, Verified ORF	YER017C	0	0.0013537		YDL223C HBT1 SGDID:S0002382, Chr IV from 60406-57266, reverse complement, Verified ORF	YDL223C	0.665895	-100		YDR434W GPI17 SGDID:S0002842, Chr IV from 1331227-1332831, Verified ORF	YDR434W	-100	0.369585
YOL004W SIN3 SGDID:S0005364, Chr XV from 316938-321548, Verified ORF	YOL004W	0	0.000750096		YDL179W PCL9 SGDID:S0002338, Chr IV from 138292-139206, Verified ORF	YDL179W	0.653977	-100		YDR093W DNF2 SGDID:S0002500, Chr IV from 631277-636115, Verified ORF	YDR093W	-100	0.369405
YBR098W MMS4 SGDID:S0000302, Chr II from 441509-443584, Verified ORF	YBR098W	0	1.07285e-05		YER162C RAD4 SGDID:S0000964, Chr V from 502889-500625, reverse complement, Verified ORF	YER162C	0.603257	-100		YLR207W HRD3 SGDID:S0004197, Chr XII from 556790-559291, Verified ORF	YLR207W	-100	0.360466
YFL025C BST1 SGDID:S0001869, Chr VI from 87232-84143, reverse complement, Verified ORF	YFL025C	0	0		YNL297C MON2 SGDID:S0005241, Chr XIV from 76581-71671, reverse complement, Verified ORF	YNL297C	0.577612	-100		YPL119C DBP1 SGDID:S0006040, Chr XVI from 326263-324410, reverse complement, Verified ORF	YPL119C	-100	0.351131
YOR098C NUP1 SGDID:S0005624, Chr XV from 511178-507948, reverse complement, Verified ORF	YOR098C	0	0		YGR070W ROM1 SGDID:S0003302, Chr VII from 627810-631277, Verified ORF	YGR070W	0.558338	-100		YDR362C TFC6 SGDID:S0002770, Chr IV from 1198687-1196669, reverse complement, Verified ORF	YDR362C	-100	0.332856
YOR129C YOR129C SGDID:S0005655, Chr XV from 569558-566877, reverse complement, Verified ORF	YOR129C	0	0		YDL058W USO1 SGDID:S0002216, Chr IV from 345665-351037, Verified ORF	YDL058W	0.474715	-100		YGL207W SPT16 SGDID:S0003175, Chr VII from 98973-102080, Verified ORF	YGL207W	-100	0.320439
YPL216W YPL216W SGDID:S0006137, Chr XVI from 143820-147128, Uncharacterized ORF	YPL216W	0	0		YOR217W RFC1 SGDID:S0005743, Chr XV from 749301-751886, Verified ORF	YOR217W	0.464619	-100		YDR175C RSM24 SGDID:S0002582, Chr IV from 814147-813188, reverse complement, Verified ORF	YDR175C	-100	0.314006
YER008C SEC3 SGDID:S0000810, Chr V from 171817-167807, reverse complement, Verified ORF	YER008C	23.2918	-100		YOR291W YOR291W SGDID:S0005817, Chr XV from 861172-865590, Uncharacterized ORF	YOR291W	0.461088	-100		YNL009W IDP3 SGDID:S0004954, Chr XIV from 614820-616082, Verified ORF	YNL009W	-100	0.310601
YGL178W MPT5 SGDID:S0003146, Chr VII from 167358-167360,168001-170577, Verified ORF	YGL178W	14.7617	-100		YCL014W BUD3 SGDID:S0000520, Chr III from 96280-101190, Verified ORF	YCL014W	0.422798	-100		YEL042W GDA1 SGDID:S0000768, Chr V from 73771-75327, Verified ORF	YEL042W	-100	0.30859
YDR122W KIN1 SGDID:S0002529, Chr IV from 694695-697889, Verified ORF	YDR122W	10.3328	-100		YMR146C TIF34 SGDID:S0004754, Chr XIII from 558523-557480, reverse complement, Verified ORF	YMR146C	0.40959	-100		YPR168W NUT2 SGDID:S0006372, Chr XVI from 878072-878545, Verified ORF	YPR168W	-100	0.306804
YGR117C YGR117C SGDID:S0003349, Chr VII from 726483-725053, reverse complement, Uncharacterized ORF	YGR117C	9.84973	-100		YHR015W MIP6 SGDID:S0001057, Chr VIII from 134546-136525, Verified ORF	YHR015W	0.404367	-100		YBR276C PPS1 SGDID:S0000480, Chr II from 760039-757616, reverse complement, Verified ORF	YBR276C	-100	0.302102
YLR096W KIN2 SGDID:S0004086, Chr XII from 332591-336034, Verified ORF	YLR096W	9.22276	-100		YDL139C SCM3 SGDID:S0002298, Chr IV from 212047-211376, reverse complement, Uncharacterized ORF	YDL139C	0.397881	-100		YFR038W YFR038W SGDID:S0001934, Chr VI from 229367-231928, Uncharacterized ORF	YFR038W	-100	0.298255
YDR239C YDR239C SGDID:S0002647, Chr IV from 943414-941051, reverse complement, Uncharacterized ORF	YDR239C	8.11436	-100		YGR123C PPT1 SGDID:S0003355, Chr VII from 738208-736667, reverse complement, Verified ORF	YGR123C	0.371659	-100		YER166W DNF1 SGDID:S0000968, Chr V from 512739-517454, Verified ORF	YER166W	-100	0.293083
YJL016W YJL016W SGDID:S0003553, Chr X from 405504-407189, Uncharacterized ORF	YJL016W	7.98205	-100		YNL201C PSY2 SGDID:S0005145, Chr XIV from 263202-260626, reverse complement, Uncharacterized ORF	YNL201C	0.361888	-100		YNL020C ARK1 SGDID:S0004965, Chr XIV from 597538-595622, reverse complement, Verified ORF	YNL020C	-100	0.290734
YIL122W POG1 SGDID:S0001384, Chr IX from 130607-131662, Verified ORF	YIL122W	7.72214	-100		YMR182C RGM1 SGDID:S0004794, Chr XIII from 625166-624531, reverse complement, Verified ORF	YMR182C	0.351054	-100		YMR264W CUE1 SGDID:S0004877, Chr XIII from 795804-796415, Verified ORF	YMR264W	-100	0.279333
YDR379W RGA2 SGDID:S0002787, Chr IV from 1230157-1233186, Verified ORF	YDR379W	6.16885	-100		YLR352W YLR352W SGDID:S0004344, Chr XII from 831115-833538, Uncharacterized ORF	YLR352W	0.342095	-100		YOL021C DIS3 SGDID:S0005381, Chr XV from 285426-282421, reverse complement, Verified ORF	YOL021C	-100	0.259139
YNL058C YNL058C SGDID:S0005003, Chr XIV from 516712-515762, reverse complement, Uncharacterized ORF	YNL058C	6.03772	-100		YDR487C RIB3 SGDID:S0002895, Chr IV from 1428970-1428344, reverse complement, Verified ORF	YDR487C	0.322272	-100		YIL073C SPO22 SGDID:S0001335, Chr IX from 225951-225897,225806-222934, reverse complement, Verified ORF	YIL073C	-100	0.246689
YFL042C YFL042C SGDID:S0001852, Chr VI from 47744-45720, reverse complement, Uncharacterized ORF	YFL042C	6.02794	-100		YAL017W PSK1 SGDID:S0000015, Chr I from 120226-124296, Verified ORF	YAL017W	0.316819	-100		YHR072W ERG7 SGDID:S0001114, Chr VIII from 239099-241294, Verified ORF	YHR072W	-100	0.23228
YDR528W HLR1 SGDID:S0002936, Chr IV from 1494576-1495847, Verified ORF	YDR528W	5.54839	-100		YER028C MIG3 SGDID:S0000830, Chr V from 211875-210691, reverse complement, Verified ORF	YER028C	0.315042	-100		YNL275W YNL275W SGDID:S0005219, Chr XIV from 119266-120996, Uncharacterized ORF	YNL275W	-100	0.214284
YDL109C YDL109C SGDID:S0002267, Chr IV from 267201-265258, reverse complement, Uncharacterized ORF	YDL109C	5.43431	-100		YIL002C INP51 SGDID:S0001264, Chr IX from 353428-350588, reverse complement, Verified ORF	YIL002C	0.296234	-100		YMR304W UBP15 SGDID:S0004920, Chr XIII from 874986-878678, Verified ORF	YMR304W	-100	0.209913
YDR170C SEC7 SGDID:S0002577, Chr IV from 802217-796188, reverse complement, Verified ORF	YDR170C	5.36798	-100		YDR463W STP1 SGDID:S0002871, Chr IV from 1386806-1388365, Verified ORF	YDR463W	0.268464	-100		YJR049C UTR1 SGDID:S0003810, Chr X from 528390-526798, reverse complement, Verified ORF	YJR049C	-100	0.209327
YDR150W NUM1 SGDID:S0002557, Chr IV from 755623-763869, Verified ORF	YDR150W	5.27662	-100		YIL105C SLM1 SGDID:S0001367, Chr IX from 169638-167578, reverse complement, Uncharacterized ORF	YIL105C	0.248928	-100		YHR108W GGA2 SGDID:S0001150, Chr VIII from 328305-330062, Verified ORF	YHR108W	-100	0.208402
YKR089C STC1 SGDID:S0001797, Chr XI from 608007-605275, reverse complement, Uncharacterized ORF	YKR089C	5.13805	-100		YDR186C YDR186C SGDID:S0002594, Chr IV from 835487-832854, reverse complement, Uncharacterized ORF	YDR186C	0.248322	-100		YPL245W YPL245W SGDID:S0006166, Chr XVI from 85586-86950, Uncharacterized ORF	YPL245W	-100	0.203749
YBR133C HSL7 SGDID:S0000337, Chr II from 504281-501798, reverse complement, Verified ORF	YBR133C	5.12598	-100		YDR128W YDR128W SGDID:S0002535, Chr IV from 709544-712990, Uncharacterized ORF	YDR128W	0.243073	-100		YOR160W MTR10 SGDID:S0005686, Chr XV from 633839-636757, Verified ORF	YOR160W	-100	0.197958
YNL101W AVT4 SGDID:S0005045, Chr XIV from 434999-437140, Verified ORF	YNL101W	4.50873	-100		YDL213C NOP6 SGDID:S0002372, Chr IV from 77967-77290, reverse complement, Uncharacterized ORF	YDL213C	0.239097	-100		YDR009W GAL3 SGDID:S0002416, Chr IV from 463431-464993, Verified ORF	YDR009W	-100	0.182824
YBR255W YBR255W SGDID:S0000459, Chr II from 724451-726535, Uncharacterized ORF	YBR255W	3.94334	-100		YLR350W ORM2 SGDID:S0004342, Chr XII from 828729-829379, Verified ORF	YLR350W	0.234386	-100		YDR045C RPC11 SGDID:S0002452, Chr IV from 548307-547975, reverse complement, Verified ORF	YDR045C	-100	0.1574
YER033C ZRG8 SGDID:S0000835, Chr V from 221286-218056, reverse complement, Verified ORF	YER033C	3.90474	-100		YGR110W YGR110W SGDID:S0003342, Chr VII from 713713-715050, Uncharacterized ORF	YGR110W	0.216989	-100		YDL178W DLD2 SGDID:S0002337, Chr IV from 139523-141115, Verified ORF	YDL178W	-100	0.145915
YLR020C YLR020C SGDID:S0004010, Chr XII from 183404-181788, reverse complement, Uncharacterized ORF	YLR020C	3.54123	-100		YNR015W SMM1 SGDID:S0005298, Chr XIV from 653387-654541, Verified ORF	YNR015W	0.215819	-100		YDR051C YDR051C SGDID:S0002458, Chr IV from 558057-557053, reverse complement, Uncharacterized ORF	YDR051C	-100	0.141219
YEL043W YEL043W SGDID:S0000769, Chr V from 70478-73348, Uncharacterized ORF	YEL043W	3.09846	-100		YGL116W CDC20 SGDID:S0003084, Chr VII from 289812-291644, Verified ORF	YGL116W	0.204877	-100		YPL236C YPL236C SGDID:S0006157, Chr XVI from 102702-101608, reverse complement, Uncharacterized ORF	YPL236C	-100	0.139119
YFL002C SPB4 SGDID:S0001894, Chr VI from 146929-145109, reverse complement, Verified ORF	YFL002C	3.08891	-100		YLR436C ECM30 SGDID:S0004428, Chr XII from 1011241-1007417, reverse complement, Verified ORF	YLR436C	0.204318	-100		YEL062W NPR2 SGDID:S0000788, Chr V from 34407-36254, Verified ORF	YEL062W	-100	0.138739
YOL128C YGK3 SGDID:S0005488, Chr XV from 79478-78351, reverse complement, Verified ORF	YOL128C	2.92129	-100		YAL041W CDC24 SGDID:S0000039, Chr I from 62841-65405, Verified ORF	YAL041W	0.203768	-100		YLR330W CHS5 SGDID:S0004322, Chr XII from 787664-789679, Verified ORF	YLR330W	-100	0.135904
YNL271C BNI1 SGDID:S0005215, Chr XIV from 135382-129521, reverse complement, Verified ORF	YNL271C	2.89232	-100		YKL193C SDS22 SGDID:S0001676, Chr XI from 79887-78871, reverse complement, Verified ORF	YKL193C	0.202529	-100		YJL129C TRK1 SGDID:S0003665, Chr X from 177224-173517, reverse complement, Verified ORF	YJL129C	-100	0.134102
YGL139W YGL139W SGDID:S0003107, Chr VII from 245721-248129, Uncharacterized ORF	YGL139W	2.77471	-100		YDL030W PRP9 SGDID:S0002188, Chr IV from 397534-399126, Verified ORF	YDL030W	0.199667	-100		YGL077C HNM1 SGDID:S0003045, Chr VII from 363919-362228, reverse complement, Verified ORF	YGL077C	-100	0.127932
YDR264C AKR1 SGDID:S0002672, Chr IV from 998317-996023, reverse complement, Verified ORF	YDR264C	2.74631	-100		YBR066C NRG2 SGDID:S0000270, Chr II from 370697-370035, reverse complement, Verified ORF	YBR066C	0.18315	-100		YHR176W FMO1 SGDID:S0001219, Chr VIII from 454228-455526, Verified ORF	YHR176W	-100	0.123277
YBR234C ARC40 SGDID:S0000438, Chr II from 686587-685433, reverse complement, Verified ORF	YBR234C	2.72636	-100		YPR022C YPR022C SGDID:S0006226, Chr XVI from 607309-603908, reverse complement, Uncharacterized ORF	YPR022C	0.178844	-100		YLR328W NMA1 SGDID:S0004320, Chr XII from 784913-786118, Verified ORF	YLR328W	-100	0.121701
YOR269W PAC1 SGDID:S0005795, Chr XV from 826382-827866, Verified ORF	YOR269W	2.71166	-100		YPL097W MSY1 SGDID:S0006018, Chr XVI from 364949-366427, Verified ORF	YPL097W	0.178655	-100		YPL049C DIG1 SGDID:S0005970, Chr XVI from 463836-462478, reverse complement, Verified ORF	YPL049C	-100	0.121404
YOR023C AHC1 SGDID:S0005549, Chr XV from 377711-376011, reverse complement, Verified ORF	YOR023C	2.70345	-100		YBL027W RPL19B SGDID:S0000123, Chr II from 168426-168427,168812-169379, Verified ORF	YBL027W	0.173726	-100		YPL249C GYP5 SGDID:S0006170, Chr XVI from 79353-76669, reverse complement, Verified ORF	YPL249C	-100	0.120352
YNR014W YNR014W SGDID:S0005297, Chr XIV from 652465-653103, Uncharacterized ORF	YNR014W	2.53578	-100		YPL260W YPL260W SGDID:S0006181, Chr XVI from 49303-50958, Uncharacterized ORF	YPL260W	0.169311	-100		YDL215C GDH2 SGDID:S0002374, Chr IV from 73919-70641, reverse complement, Verified ORF	YDL215C	-100	0.114077
YBR102C EXO84 SGDID:S0000306, Chr II from 447317-445056, reverse complement, Verified ORF	YBR102C	2.53566	-100		YDR389W SAC7 SGDID:S0002797, Chr IV from 1252527-1254491, Verified ORF	YDR389W	0.148378	-100		YLR422W YLR422W SGDID:S0004414, Chr XII from 965893-971691, Uncharacterized ORF	YLR422W	-100	0.112227
YOR077W RTS2 SGDID:S0005603, Chr XV from 471900-472598, Verified ORF	YOR077W	2.31754	-100		YMR250W GAD1 SGDID:S0004862, Chr XIII from 770800-772557, Verified ORF	YMR250W	0.147097	-100		YGR143W SKN1 SGDID:S0003375, Chr VII from 775198-777513, Verified ORF	YGR143W	-100	0.111824
YJL056C ZAP1 SGDID:S0003592, Chr X from 332989-330347, reverse complement, Verified ORF	YJL056C	2.00995	-100		YNL307C MCK1 SGDID:S0005251, Chr XIV from 57573-56446, reverse complement, Verified ORF	YNL307C	0.144066	-100		YBR018C GAL7 SGDID:S0000222, Chr II from 275527-274427, reverse complement, Verified ORF	YBR018C	-100	0.109023
YDL167C NRP1 SGDID:S0002326, Chr IV from 163155-160996, reverse complement, Verified ORF	YDL167C	1.96432	-100		YNL252C MRPL17 SGDID:S0005196, Chr XIV from 172285-171440, reverse complement, Verified ORF	YNL252C	0.143772	-100		YBL076C ILS1 SGDID:S0000172, Chr II from 84259-81041, reverse complement, Verified ORF	YBL076C	-100	0.105681
YKL185W ASH1 SGDID:S0001668, Chr XI from 94504-96270, Verified ORF	YKL185W	1.96166	-100		YKL101W HSL1 SGDID:S0001584, Chr XI from 248566-253122, Verified ORF	YKL101W	0.142464	-100		YDR485C VPS72 SGDID:S0002893, Chr IV from 1427197-1424810, reverse complement, Verified ORF	YDR485C	-100	0.105615
YOL041C NOP12 SGDID:S0005401, Chr XV from 252644-251265, reverse complement, Verified ORF	YOL041C	1.94591	-100		YKL201C MNN4 SGDID:S0001684, Chr XI from 67467-63931, reverse complement, Verified ORF	YKL201C	0.140785	-100		YGR261C APL6 SGDID:S0003493, Chr VII from 1016756-1014327, reverse complement, Verified ORF	YGR261C	-100	0.102202
YKR031C SPO14 SGDID:S0001739, Chr XI from 506037-500986, reverse complement, Verified ORF	YKR031C	1.90704	-100		YCL017C NFS1 SGDID:S0000522, Chr III from 94269-92776, reverse complement, Verified ORF	YCL017C	0.138241	-100		YHR084W STE12 SGDID:S0001126, Chr VIII from 274175-276241, Verified ORF	YHR084W	-100	0.0984877
YGR021W YGR021W SGDID:S0003253, Chr VII from 527636-528508, Uncharacterized ORF	YGR021W	1.80842	-100		YMR296C LCB1 SGDID:S0004911, Chr XIII from 860890-859214, reverse complement, Verified ORF	YMR296C	0.136045	-100		YNL320W YNL320W SGDID:S0005264, Chr XIV from 37699-38553, Uncharacterized ORF	YNL320W	-100	0.0954483
YBR001C NTH2 SGDID:S0000205, Chr II from 241285-238943, reverse complement, Verified ORF	YBR001C	1.75832	-100		YCR072C YCR072C SGDID:S0000668, Chr III from 242347-240800, reverse complement, Uncharacterized ORF	YCR072C	0.129768	-100		YMR176W ECM5 SGDID:S0004788, Chr XIII from 611739-615974, Verified ORF	YMR176W	-100	0.0942993
YKR100C SKG1 SGDID:S0001808, Chr XI from 639606-638539, reverse complement, Uncharacterized ORF	YKR100C	1.74523	-100		YMR295C YMR295C SGDID:S0004910, Chr XIII from 858889-858296, reverse complement, Uncharacterized ORF	YMR295C	0.128067	-100		YGR017W YGR017W SGDID:S0003249, Chr VII from 523791-524684, Uncharacterized ORF	YGR017W	-100	0.0924104
YGR097W ASK10 SGDID:S0003329, Chr VII from 678699-682139, Verified ORF	YGR097W	1.63256	-100		YBR084C-A RPL19A SGDID:S0002156, Chr II from 415255-415254,414747-414180, reverse complement, Verified ORF	YBR084C-A	0.122333	-100		YGL212W VAM7 SGDID:S0003180, Chr VII from 91436-92386, Verified ORF	YGL212W	-100	0.0918532
YKL040C NFU1 SGDID:S0001523, Chr XI from 361472-360702, reverse complement, Verified ORF	YKL040C	1.61698	-100		YGL209W MIG2 SGDID:S0003177, Chr VII from 95862-97010, Verified ORF	YGL209W	0.121074	-100		YNR016C ACC1 SGDID:S0005299, Chr XIV from 661374-654673, reverse complement, Verified ORF	YNR016C	-100	0.0862398
YGL191W COX13 SGDID:S0003159, Chr VII from 144814-145203, Verified ORF	YGL191W	1.59858	-100		YDR043C NRG1 SGDID:S0002450, Chr IV from 543366-542671, reverse complement, Verified ORF	YDR043C	0.119072	-100		YMR128W ECM16 SGDID:S0004735, Chr XIII from 523695-527498, Verified ORF	YMR128W	-100	0.0862389
YER114C BOI2 SGDID:S0000916, Chr V from 393708-390586, reverse complement, Verified ORF	YER114C	1.55233	-100		YDR216W ADR1 SGDID:S0002624, Chr IV from 895029-899000, Verified ORF	YDR216W	0.118994	-100		YJR101W RSM26 SGDID:S0003862, Chr X from 618148-618948, Verified ORF	YJR101W	-100	0.0836674
YJL095W BCK1 SGDID:S0003631, Chr X from 247171-251607, Verified ORF	YJL095W	1.5211	-100		YLR360W VPS38 SGDID:S0004352, Chr XII from 846102-847421, Verified ORF	YLR360W	0.11282	-100		YBL102W SFT2 SGDID:S0000198, Chr II from 24098-24745, Verified ORF	YBL102W	-100	0.0794564
YDR011W SNQ2 SGDID:S0002418, Chr IV from 465916-470421, Verified ORF	YDR011W	1.47551	-100		YER069W ARG5,6 SGDID:S0000871, Chr V from 295408-297999, Verified ORF	YER069W	0.110687	-100		YKR050W TRK2 SGDID:S0001758, Chr XI from 527457-530126, Verified ORF	YKR050W	-100	0.077013
YOL102C TPT1 SGDID:S0005462, Chr XV from 126688-125996, reverse complement, Verified ORF	YOL102C	1.47328	-100		YLR409C UTP21 SGDID:S0004401, Chr XII from 937230-934411, reverse complement, Uncharacterized ORF	YLR409C	0.109982	-100		YKL129C MYO3 SGDID:S0001612, Chr XI from 200165-196350, reverse complement, Verified ORF	YKL129C	-100	0.0768951
YER172C BRR2 SGDID:S0000974, Chr V from 536016-529525, reverse complement, Verified ORF	YER172C	1.43321	-100		YMR081C ISF1 SGDID:S0004686, Chr XIII from 431094-430078, reverse complement, Verified ORF	YMR081C	0.10716	-100		YPR166C MRP2 SGDID:S0006370, Chr XVI from 876625-876278, reverse complement, Verified ORF	YPR166C	-100	0.0758846
YFR007W YFR007W SGDID:S0001903, Chr VI from 159293-160354, Uncharacterized ORF	YFR007W	1.29315	-100		YER080W FMP29 SGDID:S0000882, Chr V from 319959-321842, Uncharacterized ORF	YER080W	0.0996182	-100		YOR172W YRM1 SGDID:S0005698, Chr XV from 654210-656570, Verified ORF	YOR172W	-100	0.0672164
YNL251C NRD1 SGDID:S0005195, Chr XIV from 174314-172587, reverse complement, Verified ORF	YNL251C	1.23894	-100		YOL115W TRF4 SGDID:S0005475, Chr XV from 101474-103228, Verified ORF	YOL115W	0.0984298	-100		YDR410C STE14 SGDID:S0002818, Chr IV from 1293081-1292362, reverse complement, Verified ORF	YDR410C	-100	0.0566792
YOL078W AVO1 SGDID:S0005438, Chr XV from 181681-185211, Verified ORF	YOL078W	1.23293	-100		YHR158C KEL1 SGDID:S0001201, Chr VIII from 417181-413687, reverse complement, Verified ORF	YHR158C	0.0974815	-100		YPR100W MRPL51 SGDID:S0006304, Chr XVI from 729789-730211, Verified ORF	YPR100W	-100	0.0520556
YMR206W YMR206W SGDID:S0004819, Chr XIII from 675895-676836, Uncharacterized ORF	YMR206W	1.22019	-100		YNL027W CRZ1 SGDID:S0004972, Chr XIV from 579579-581615, Verified ORF	YNL027W	0.0967744	-100		YLR249W YEF3 SGDID:S0004239, Chr XII from 636782-639916, Verified ORF	YLR249W	-100	0.0490395
YNL010W YNL010W SGDID:S0004955, Chr XIV from 613634-614359, Uncharacterized ORF	YNL010W	1.16938	-100		YKL189W HYM1 SGDID:S0001672, Chr XI from 84709-85908, Verified ORF	YKL189W	0.0945545	-100		YJR076C CDC11 SGDID:S0003837, Chr X from 576515-575268, reverse complement, Verified ORF	YJR076C	-100	0.047989
YDL127W PCL2 SGDID:S0002285, Chr IV from 234927-235853, Verified ORF	YDL127W	1.15788	-100		YER129W PAK1 SGDID:S0000931, Chr V from 417277-420705, Verified ORF	YER129W	0.0901377	-100		YML121W GTR1 SGDID:S0004590, Chr XIII from 26930-27862, Verified ORF	YML121W	-100	0.0454161
YMR092C AIP1 SGDID:S0004698, Chr XIII from 453478-451631, reverse complement, Verified ORF	YMR092C	1.15713	-100		YIL044C AGE2 SGDID:S0001306, Chr IX from 273845-272949, reverse complement, Verified ORF	YIL044C	0.0891331	-100		YLR028C ADE16 SGDID:S0004018, Chr XII from 201316-199541, reverse complement, Verified ORF	YLR028C	-100	0.04436
YPL221W BOP1 SGDID:S0006142, Chr XVI from 133042-135423, Uncharacterized ORF	YPL221W	1.12983	-100		YNL314W DAL82 SGDID:S0005258, Chr XIV from 44446-45213, Verified ORF	YNL314W	0.0871498	-100		YIL124W AYR1 SGDID:S0001386, Chr IX from 126204-127097, Verified ORF	YIL124W	-100	0.0409419
YJL109C UTP10 SGDID:S0003645, Chr X from 217226-211917, reverse complement, Verified ORF	YJL109C	1.05478	-100		YDR188W CCT6 SGDID:S0002596, Chr IV from 836416-838056, Verified ORF	YDR188W	0.0823576	-100		YBL004W UTP20 SGDID:S0000100, Chr II from 227639-235120, Uncharacterized ORF	YBL004W	-100	0.0404513
YCL051W LRE1 SGDID:S0000556, Chr III from 35865-37616, Verified ORF	YCL051W	1.01438	-100		YKL104C GFA1 SGDID:S0001587, Chr XI from 245019-242866, reverse complement, Verified ORF	YKL104C	0.0777377	-100		YPR122W AXL1 SGDID:S0006326, Chr XVI from 782041-785667, Verified ORF	YPR122W	-100	0.0401938
YMR280C CAT8 SGDID:S0004893, Chr XIII from 831328-827027, reverse complement, Verified ORF	YMR280C	1.00444	-100		YOR267C HRK1 SGDID:S0005793, Chr XV from 824864-822585, reverse complement, Verified ORF	YOR267C	0.0764213	-100		YBR021W FUR4 SGDID:S0000225, Chr II from 281443-283344, Verified ORF	YBR021W	-100	0.0379866
YOL070C YOL070C SGDID:S0005431, Chr XV from 198724-197219, reverse complement, Uncharacterized ORF	YOL070C	0.944951	-100		YBL032W HEK2 SGDID:S0000128, Chr II from 160187-161332, Verified ORF	YBL032W	0.0760539	-100		YDR291W YDR291W SGDID:S0002699, Chr IV from 1039722-1042955, Uncharacterized ORF	YDR291W	-100	0.0378677
YIL095W PRK1 SGDID:S0001357, Chr IX from 183934-186366, Verified ORF	YIL095W	0.881791	-100		YKL160W ELF1 SGDID:S0001643, Chr XI from 153274-153711, Uncharacterized ORF	YKL160W	0.07203	-100		YOR204W DED1 SGDID:S0005730, Chr XV from 722911-724725, Verified ORF	YOR204W	-100	0.0333213
YOR086C TCB1 SGDID:S0005612, Chr XV from 486780-483220, reverse complement, Verified ORF	YOR086C	0.875869	-100		YKL012W PRP40 SGDID:S0001495, Chr XI from 417953-419704, Verified ORF	YKL012W	0.0694357	-100		YLR308W CDA2 SGDID:S0004299, Chr XII from 747939-748877, Verified ORF	YLR308W	-100	0.0302992
YER003C PMI40 SGDID:S0000805, Chr V from 159117-159087,158993-157735, reverse complement, Verified ORF	YER003C	0.846518	-100		YLR109W AHP1 SGDID:S0004099, Chr XII from 368782-369312, Verified ORF	YLR109W	0.067284	-100		YJL156C SSY5 SGDID:S0003692, Chr X from 128870-126807, reverse complement, Verified ORF	YJL156C	-100	0.0279193
YHR091C MSR1 SGDID:S0001133, Chr VIII from 286771-284840, reverse complement, Verified ORF	YHR091C	0.781751	-100		YMR177W MMT1 SGDID:S0004789, Chr XIII from 616565-618097, Verified ORF	YMR177W	0.0588017	-100		YGL130W CEG1 SGDID:S0003098, Chr VII from 266150-267529, Verified ORF	YGL130W	-100	0.0253503
YDR017C KCS1 SGDID:S0002424, Chr IV from 482263-479111, reverse complement, Verified ORF	YDR017C	0.768777	-100		YKL211C TRP3 SGDID:S0001694, Chr XI from 38154-36700, reverse complement, Verified ORF	YKL211C	0.0585868	-100		YLR345W YLR345W SGDID:S0004337, Chr XII from 820511-822040, Uncharacterized ORF	YLR345W	-100	0.0233185
YFL033C RIM15 SGDID:S0001861, Chr VI from 74425-69113, reverse complement, Verified ORF	YFL033C	0.743881	-100		YKL099C UTP11 SGDID:S0001582, Chr XI from 256117-255347, reverse complement, Verified ORF	YKL099C	0.0582574	-100		YKL210W UBA1 SGDID:S0001693, Chr XI from 39164-42238, Verified ORF	YKL210W	-100	0.0218818
YNL317W PFS2 SGDID:S0005261, Chr XIV from 40618-42015, Verified ORF	YNL317W	0.729089	-100		YNL299W TRF5 SGDID:S0005243, Chr XIV from 66516-68393, Verified ORF	YNL299W	0.0570839	-100		YGL038C OCH1 SGDID:S0003006, Chr VII from 426810-425368, reverse complement, Verified ORF	YGL038C	-100	0.0208635
YBL061C SKT5 SGDID:S0000157, Chr II from 107408-105318, reverse complement, Verified ORF	YBL061C	0.699852	-100		YPR173C VPS4 SGDID:S0006377, Chr XVI from 887833-886520, reverse complement, Verified ORF	YPR173C	0.0550987	-100		YGR270W YTA7 SGDID:S0003502, Chr VII from 1027376-1031515, Verified ORF	YGR270W	-100	0.0198885
YML072C TCB3 SGDID:S0004537, Chr XIII from 129367-124730, reverse complement, Verified ORF	YML072C	0.692657	-100		YGR038W ORM1 SGDID:S0003270, Chr VII from 560686-561354, Verified ORF	YGR038W	0.0534418	-100		YGR101W PCP1 SGDID:S0003333, Chr VII from 693367-694407, Verified ORF	YGR101W	-100	0.0189123
YDL223C HBT1 SGDID:S0002382, Chr IV from 60406-57266, reverse complement, Verified ORF	YDL223C	0.665895	-100		YLR058C SHM2 SGDID:S0004048, Chr XII from 259402-257993, reverse complement, Verified ORF	YLR058C	0.0506841	-100		YLR203C MSS51 SGDID:S0004193, Chr XII from 551962-550652, reverse complement, Verified ORF	YLR203C	-100	0.0187148
YDL179W PCL9 SGDID:S0002338, Chr IV from 138292-139206, Verified ORF	YDL179W	0.653977	-100		YGL136C MRM2 SGDID:S0003104, Chr VII from 253864-252902, reverse complement, Verified ORF	YGL136C	0.0502408	-100		YPL092W SSU1 SGDID:S0006013, Chr XVI from 373790-375166, Verified ORF	YPL092W	-100	0.0179388
YER162C RAD4 SGDID:S0000964, Chr V from 502889-500625, reverse complement, Verified ORF	YER162C	0.603257	-100		YPL152W RRD2 SGDID:S0006073, Chr XVI from 265027-266103, Verified ORF	YPL152W	0.0484002	-100		YEL052W AFG1 SGDID:S0000778, Chr V from 56571-58100, Verified ORF	YEL052W	-100	0.0160481
YNL297C MON2 SGDID:S0005241, Chr XIV from 76581-71671, reverse complement, Verified ORF	YNL297C	0.577612	-100		YIL042C YIL042C SGDID:S0001304, Chr IX from 276291-275107, reverse complement, Uncharacterized ORF	YIL042C	0.0475875	-100		YPL162C YPL162C SGDID:S0006083, Chr XVI from 244026-243205, reverse complement, Uncharacterized ORF	YPL162C	-100	0.0158305
YGR070W ROM1 SGDID:S0003302, Chr VII from 627810-631277, Verified ORF	YGR070W	0.558338	-100		YMR032W HOF1 SGDID:S0004635, Chr XIII from 335297-337306, Verified ORF	YMR032W	0.0431297	-100		YNL014W HEF3 SGDID:S0004959, Chr XIV from 606318-609452, Verified ORF	YNL014W	-100	0.0156108
YDL058W USO1 SGDID:S0002216, Chr IV from 345665-351037, Verified ORF	YDL058W	0.474715	-100		YPR029C APL4 SGDID:S0006233, Chr XVI from 626964-624466, reverse complement, Verified ORF	YPR029C	0.0413902	-100		YDR234W LYS4 SGDID:S0002642, Chr IV from 931123-933204, Verified ORF	YDR234W	-100	0.0143019
YOR217W RFC1 SGDID:S0005743, Chr XV from 749301-751886, Verified ORF	YOR217W	0.464619	-100		YOR219C STE13 SGDID:S0005745, Chr XV from 755009-752214, reverse complement, Verified ORF	YOR219C	0.0380463	-100		YBR020W GAL1 SGDID:S0000224, Chr II from 279021-280607, Verified ORF	YBR020W	-100	0.0136935
YOR291W YOR291W SGDID:S0005817, Chr XV from 861172-865590, Uncharacterized ORF	YOR291W	0.461088	-100		YLR405W DUS4 SGDID:S0004397, Chr XII from 929787-930890, Uncharacterized ORF	YLR405W	0.0371354	-100		YGL143C MRF1 SGDID:S0003111, Chr VII from 235963-234722, reverse complement, Verified ORF	YGL143C	-100	0.0126497
YCL014W BUD3 SGDID:S0000520, Chr III from 96280-101190, Verified ORF	YCL014W	0.422798	-100		YJR056C YJR056C SGDID:S0003817, Chr X from 542416-541706, reverse complement, Uncharacterized ORF	YJR056C	0.0366338	-100		YJR122W CAF17 SGDID:S0003883, Chr X from 649691-651184, Verified ORF	YJR122W	-100	0.0116132
YMR146C TIF34 SGDID:S0004754, Chr XIII from 558523-557480, reverse complement, Verified ORF	YMR146C	0.40959	-100		YJR089W BIR1 SGDID:S0003849, Chr X from 587632-590496, Verified ORF	YJR089W	0.0337591	-100		YPL058C PDR12 SGDID:S0005979, Chr XVI from 450374-445839, reverse complement, Verified ORF	YPL058C	-100	0.0100683
YHR015W MIP6 SGDID:S0001057, Chr VIII from 134546-136525, Verified ORF	YHR015W	0.404367	-100		YGL175C SAE2 SGDID:S0003143, Chr VII from 174328-173291, reverse complement, Verified ORF	YGL175C	0.0335635	-100		YPL208W YPL208W SGDID:S0006129, Chr XVI from 157841-159592, Uncharacterized ORF	YPL208W	-100	0.00781655
YDL139C SCM3 SGDID:S0002298, Chr IV from 212047-211376, reverse complement, Uncharacterized ORF	YDL139C	0.397881	-100		YLR310C CDC25 SGDID:S0004301, Chr XII from 756995-752226, reverse complement, Verified ORF	YLR310C	0.0330201	-100		YOR211C MGM1 SGDID:S0005737, Chr XV from 741632-738924, reverse complement, Verified ORF	YOR211C	-100	0.00761529
YGR123C PPT1 SGDID:S0003355, Chr VII from 738208-736667, reverse complement, Verified ORF	YGR123C	0.371659	-100		YOR113W AZF1 SGDID:S0005639, Chr XV from 534075-536819, Verified ORF	YOR113W	0.0329449	-100		YKL029C MAE1 SGDID:S0001512, Chr XI from 384368-382359, reverse complement, Verified ORF	YKL029C	-100	0.00745107
YNL201C PSY2 SGDID:S0005145, Chr XIV from 263202-260626, reverse complement, Uncharacterized ORF	YNL201C	0.361888	-100		YHR159W YHR159W SGDID:S0001202, Chr VIII from 417551-419065, Uncharacterized ORF	YHR159W	0.0296625	-100		YBR072W HSP26 SGDID:S0000276, Chr II from 382027-382671, Verified ORF	YBR072W	-100	0.00682604
YMR182C RGM1 SGDID:S0004794, Chr XIII from 625166-624531, reverse complement, Verified ORF	YMR182C	0.351054	-100		YKL038W RGT1 SGDID:S0001521, Chr XI from 365248-368760, Verified ORF	YKL038W	0.0295641	-100		YFR009W GCN20 SGDID:S0001905, Chr VI from 162482-164740, Verified ORF	YFR009W	-100	0.00676472
YLR352W YLR352W SGDID:S0004344, Chr XII from 831115-833538, Uncharacterized ORF	YLR352W	0.342095	-100		YPL207W YPL207W SGDID:S0006128, Chr XVI from 159908-162340, Uncharacterized ORF	YPL207W	0.0274643	-100		YDL051W LHP1 SGDID:S0002209, Chr IV from 363952-364779, Verified ORF	YDL051W	-100	0.00653362
YDR487C RIB3 SGDID:S0002895, Chr IV from 1428970-1428344, reverse complement, Verified ORF	YDR487C	0.322272	-100		YDL198C GGC1 SGDID:S0002357, Chr IV from 104552-103650, reverse complement, Verified ORF	YDL198C	0.0267972	-100		YNL301C RPL18B SGDID:S0005245, Chr XIV from 64561-64450,64017-63569, reverse complement, Verified ORF	YNL301C	-100	0.00613988
YAL017W PSK1 SGDID:S0000015, Chr I from 120226-124296, Verified ORF	YAL017W	0.316819	-100		YBR175W SWD3 SGDID:S0000379, Chr II from 582403-583350, Verified ORF	YBR175W	0.0258133	-100		YNL272C SEC2 SGDID:S0005216, Chr XIV from 129082-126803, reverse complement, Verified ORF	YNL272C	-100	0.00612097
YER028C MIG3 SGDID:S0000830, Chr V from 211875-210691, reverse complement, Verified ORF	YER028C	0.315042	-100		YPL224C MMT2 SGDID:S0006145, Chr XVI from 128087-126738, reverse complement, Verified ORF	YPL224C	0.0254681	-100		YMR109W MYO5 SGDID:S0004715, Chr XIII from 486586-490245, Verified ORF	YMR109W	-100	0.00484641
YIL002C INP51 SGDID:S0001264, Chr IX from 353428-350588, reverse complement, Verified ORF	YIL002C	0.296234	-100		YDR247W VHS1 SGDID:S0002655, Chr IV from 956007-957392, Verified ORF	YDR247W	0.023523	-100		YBR221C PDB1 SGDID:S0000425, Chr II from 666248-665148, reverse complement, Verified ORF	YBR221C	-100	0.0045104
YDR463W STP1 SGDID:S0002871, Chr IV from 1386806-1388365, Verified ORF	YDR463W	0.268464	-100		YIR034C LYS1 SGDID:S0001473, Chr IX from 420733-419612, reverse complement, Verified ORF	YIR034C	0.0234278	-100		YLR199C YLR199C SGDID:S0004189, Chr XII from 548771-548766,548679-547855, reverse complement, Uncharacterized ORF	YLR199C	-100	0.00450428
YIL105C SLM1 SGDID:S0001367, Chr IX from 169638-167578, reverse complement, Uncharacterized ORF	YIL105C	0.248928	-100		YDL161W ENT1 SGDID:S0002320, Chr IV from 167715-169079, Verified ORF	YDL161W	0.0232043	-100		YLR299W ECM38 SGDID:S0004290, Chr XII from 726071-728053, Verified ORF	YLR299W	-100	0.00339921
YDR186C YDR186C SGDID:S0002594, Chr IV from 835487-832854, reverse complement, Uncharacterized ORF	YDR186C	0.248322	-100		YBR196C PGI1 SGDID:S0000400, Chr II from 613895-612231, reverse complement, Verified ORF	YBR196C	0.0222663	-100		YDR078C SHU2 SGDID:S0002485, Chr IV from 602865-602194, reverse complement, Uncharacterized ORF	YDR078C	-100	0.00274873
YDR128W YDR128W SGDID:S0002535, Chr IV from 709544-712990, Uncharacterized ORF	YDR128W	0.243073	-100		YKL035W UGP1 SGDID:S0001518, Chr XI from 369534-371033, Verified ORF	YKL035W	0.0211439	-100		YDR380W ARO10 SGDID:S0002788, Chr IV from 1234208-1236115, Verified ORF	YDR380W	-100	0.00240636
YDL213C NOP6 SGDID:S0002372, Chr IV from 77967-77290, reverse complement, Uncharacterized ORF	YDL213C	0.239097	-100		YOR174W MED4 SGDID:S0005700, Chr XV from 658747-659601, Verified ORF	YOR174W	0.0209759	-100		YLR075W RPL10 SGDID:S0004065, Chr XII from 282928-283593, Verified ORF	YLR075W	-100	0.00198627
YLR350W ORM2 SGDID:S0004342, Chr XII from 828729-829379, Verified ORF	YLR350W	0.234386	-100		YOL053W YOL053W SGDID:S0005414, Chr XV from 230083-231270, Uncharacterized ORF	YOL053W	0.0207547	-100		YGR204W ADE3 SGDID:S0003436, Chr VII from 905939-908779, Verified ORF	YGR204W	-100	0.00186526
YGR110W YGR110W SGDID:S0003342, Chr VII from 713713-715050, Uncharacterized ORF	YGR110W	0.216989	-100		YOR349W CIN1 SGDID:S0005876, Chr XV from 989784-992828, Verified ORF	YOR349W	0.0195716	-100		YER036C ARB1 SGDID:S0000838, Chr V from 225198-223366, reverse complement, Uncharacterized ORF	YER036C	-100	0.00161088
YNR015W SMM1 SGDID:S0005298, Chr XIV from 653387-654541, Verified ORF	YNR015W	0.215819	-100		YDR422C SIP1 SGDID:S0002830, Chr IV from 1317907-1315316, reverse complement, Verified ORF	YDR422C	0.0192858	-100		YPR081C GRS2 SGDID:S0006285, Chr XVI from 703968-702112, reverse complement, Verified ORF	YPR081C	-100	0.00145101
YGL116W CDC20 SGDID:S0003084, Chr VII from 289812-291644, Verified ORF	YGL116W	0.204877	-100		YJL083W YJL083W SGDID:S0003619, Chr X from 278757-280571, Uncharacterized ORF	YJL083W	0.0183321	-100		YOR298W YOR298W SGDID:S0005824, Chr XV from 875596-877035, Uncharacterized ORF	YOR298W	-100	0.00112557
YLR436C ECM30 SGDID:S0004428, Chr XII from 1011241-1007417, reverse complement, Verified ORF	YLR436C	0.204318	-100		YLR431C ATG23 SGDID:S0004423, Chr XII from 1001699-1000338, reverse complement, Verified ORF	YLR431C	0.0176145	-100		YLL007C YLL007C SGDID:S0003930, Chr XII from 136298-134301, reverse complement, Uncharacterized ORF	YLL007C	-100	0.00111569
YAL041W CDC24 SGDID:S0000039, Chr I from 62841-65405, Verified ORF	YAL041W	0.203768	-100		YHR073W OSH3 SGDID:S0001115, Chr VIII from 242583-245573, Verified ORF	YHR073W	0.0172584	-100		YER019W ISC1 SGDID:S0000821, Chr V from 192796-194229, Verified ORF	YER019W	-100	0.000960158
YKL193C SDS22 SGDID:S0001676, Chr XI from 79887-78871, reverse complement, Verified ORF	YKL193C	0.202529	-100		YBR108W YBR108W SGDID:S0000312, Chr II from 454816-457659, Uncharacterized ORF	YBR108W	0.0170844	-100		YKL004W AUR1 SGDID:S0001487, Chr XI from 435223-436428, Verified ORF	YKL004W	-100	0.000949244
YDL030W PRP9 SGDID:S0002188, Chr IV from 397534-399126, Verified ORF	YDL030W	0.199667	-100		YOR202W HIS3 SGDID:S0005728, Chr XV from 721946-722608, Verified ORF	YOR202W	0.0169811	-100		YDL015C TSC13 SGDID:S0002173, Chr IV from 426931-425999, reverse complement, Verified ORF	YDL015C	-100	0.000894203
YBR066C NRG2 SGDID:S0000270, Chr II from 370697-370035, reverse complement, Verified ORF	YBR066C	0.18315	-100		YNL053W MSG5 SGDID:S0004998, Chr XIV from 529941-531410, Verified ORF	YNL053W	0.0162635	-100		YOR085W OST3 SGDID:S0005611, Chr XV from 482034-483086, Verified ORF	YOR085W	-100	0.000835599
YPR022C YPR022C SGDID:S0006226, Chr XVI from 607309-603908, reverse complement, Uncharacterized ORF	YPR022C	0.178844	-100		YDR406W PDR15 SGDID:S0002814, Chr IV from 1279200-1283789, Verified ORF	YDR406W	0.0153941	-100		YGR103W NOP7 SGDID:S0003335, Chr VII from 695421-697238, Verified ORF	YGR103W	-100	0.000828977
YPL097W MSY1 SGDID:S0006018, Chr XVI from 364949-366427, Verified ORF	YPL097W	0.178655	-100		YOR048C RAT1 SGDID:S0005574, Chr XV from 421650-418630, reverse complement, Verified ORF	YOR048C	0.0139287	-100		YBR247C ENP1 SGDID:S0000451, Chr II from 714450-712999, reverse complement, Verified ORF	YBR247C	-100	0.00073454
YBL027W RPL19B SGDID:S0000123, Chr II from 168426-168427,168812-169379, Verified ORF	YBL027W	0.173726	-100		YPL063W TIM50 SGDID:S0005984, Chr XVI from 429936-431366, Verified ORF	YPL063W	0.013789	-100		YDL123W SNA4 SGDID:S0002281, Chr IV from 241418-241840, Verified ORF	YDL123W	-100	0.000728255
YPL260W YPL260W SGDID:S0006181, Chr XVI from 49303-50958, Uncharacterized ORF	YPL260W	0.169311	-100		YNL006W LST8 SGDID:S0004951, Chr XIV from 620067-620978, Verified ORF	YNL006W	0.0130456	-100		YDL035C GPR1 SGDID:S0002193, Chr IV from 392054-389169, reverse complement, Verified ORF	YDL035C	-100	0.000690335
YDR389W SAC7 SGDID:S0002797, Chr IV from 1252527-1254491, Verified ORF	YDR389W	0.148378	-100		YER167W BCK2 SGDID:S0000969, Chr V from 518211-520766, Verified ORF	YER167W	0.0123878	-100		YIL023C YIL023C SGDID:S0001285, Chr IX from 310424-309384, reverse complement, Uncharacterized ORF	YIL023C	-100	0.000623168
YMR250W GAD1 SGDID:S0004862, Chr XIII from 770800-772557, Verified ORF	YMR250W	0.147097	-100		YLR347C KAP95 SGDID:S0004339, Chr XII from 826412-823827, reverse complement, Verified ORF	YLR347C	0.0122819	-100		YGL023C PIB2 SGDID:S0002991, Chr VII from 452109-450202, reverse complement, Verified ORF	YGL023C	-100	0.000532243
YNL307C MCK1 SGDID:S0005251, Chr XIV from 57573-56446, reverse complement, Verified ORF	YNL307C	0.144066	-100		YGL035C MIG1 SGDID:S0003003, Chr VII from 433067-431553, reverse complement, Verified ORF	YGL035C	0.0118773	-100		YBR163W DEM1 SGDID:S0000367, Chr II from 565718-567475, Verified ORF	YBR163W	-100	0.000528962
YNL252C MRPL17 SGDID:S0005196, Chr XIV from 172285-171440, reverse complement, Verified ORF	YNL252C	0.143772	-100		YAL024C LTE1 SGDID:S0000022, Chr I from 105873-101566, reverse complement, Verified ORF	YAL024C	0.0109803	-100		YMR120C ADE17 SGDID:S0004727, Chr XIII from 509279-507501, reverse complement, Verified ORF	YMR120C	-100	0.000429897
YKL101W HSL1 SGDID:S0001584, Chr XI from 248566-253122, Verified ORF	YKL101W	0.142464	-100		YGL172W NUP49 SGDID:S0003140, Chr VII from 180706-182124, Verified ORF	YGL172W	0.0108171	-100		YER077C YER077C SGDID:S0000879, Chr V from 316596-314530, reverse complement, Uncharacterized ORF	YER077C	-100	0.000398309
YKL201C MNN4 SGDID:S0001684, Chr XI from 67467-63931, reverse complement, Verified ORF	YKL201C	0.140785	-100		YKL064W MNR2 SGDID:S0001547, Chr XI from 317409-320318, Verified ORF	YKL064W	0.0106685	-100		YBR084W MIS1 SGDID:S0000288, Chr II from 411048-413975, Verified ORF	YBR084W	-100	0.000362326
YCL017C NFS1 SGDID:S0000522, Chr III from 94269-92776, reverse complement, Verified ORF	YCL017C	0.138241	-100		YDR117C YDR117C SGDID:S0002524, Chr IV from 685638-683941, reverse complement, Uncharacterized ORF	YDR117C	0.0105418	-100		YGR060W ERG25 SGDID:S0003292, Chr VII from 610568-611497, Verified ORF	YGR060W	-100	0.000346811
YMR296C LCB1 SGDID:S0004911, Chr XIII from 860890-859214, reverse complement, Verified ORF	YMR296C	0.136045	-100		YDR049W YDR049W SGDID:S0002456, Chr IV from 553251-555149, Uncharacterized ORF	YDR049W	0.0103825	-100		YDL029W ARP2 SGDID:S0002187, Chr IV from 399337-399358,399482-400635, Verified ORF	YDL029W	-100	0.000333776
YCR072C YCR072C SGDID:S0000668, Chr III from 242347-240800, reverse complement, Uncharacterized ORF	YCR072C	0.129768	-100		YDR443C SSN2 SGDID:S0002851, Chr IV from 1349928-1345666, reverse complement, Verified ORF	YDR443C	0.0102116	-100		YHR151C YHR151C SGDID:S0001194, Chr VIII from 400850-399270, reverse complement, Uncharacterized ORF	YHR151C	-100	0.000287538
YMR295C YMR295C SGDID:S0004910, Chr XIII from 858889-858296, reverse complement, Uncharacterized ORF	YMR295C	0.128067	-100		YOL006C TOP1 SGDID:S0005366, Chr XV from 315387-313078, reverse complement, Verified ORF	YOL006C	0.00977735	-100		YOL120C RPL18A SGDID:S0005480, Chr XV from 94401-94290,93842-93394, reverse complement, Verified ORF	YOL120C	-100	0.000265413
YBR084C-A RPL19A SGDID:S0002156, Chr II from 415255-415254,414747-414180, reverse complement, Verified ORF	YBR084C-A	0.122333	-100		YMR058W FET3 SGDID:S0004662, Chr XIII from 388821-390731, Verified ORF	YMR058W	0.0097363	-100		YJL154C VPS35 SGDID:S0003690, Chr X from 133853-131019, reverse complement, Verified ORF	YJL154C	-100	0.0002354
YGL209W MIG2 SGDID:S0003177, Chr VII from 95862-97010, Verified ORF	YGL209W	0.121074	-100		YDR341C YDR341C SGDID:S0002749, Chr IV from 1153618-1151795, reverse complement, Verified ORF	YDR341C	0.0091724	-100		YLR244C MAP1 SGDID:S0004234, Chr XII from 626333-625170, reverse complement, Verified ORF	YLR244C	-100	0.000168044
YDR043C NRG1 SGDID:S0002450, Chr IV from 543366-542671, reverse complement, Verified ORF	YDR043C	0.119072	-100		YJL093C TOK1 SGDID:S0003629, Chr X from 256728-254653, reverse complement, Verified ORF	YJL093C	0.00868255	-100		YDR237W MRPL7 SGDID:S0002645, Chr IV from 936609-937487, Verified ORF	YDR237W	-100	0.000164673
YDR216W ADR1 SGDID:S0002624, Chr IV from 895029-899000, Verified ORF	YDR216W	0.118994	-100		YEL053C MAK10 SGDID:S0000779, Chr V from 56102-53901, reverse complement, Verified ORF	YEL053C	0.00863042	-100		YMR290C HAS1 SGDID:S0004903, Chr XIII from 851590-850073, reverse complement, Verified ORF	YMR290C	-100	0.000146063
YLR360W VPS38 SGDID:S0004352, Chr XII from 846102-847421, Verified ORF	YLR360W	0.11282	-100		YMR215W GAS3 SGDID:S0004828, Chr XIII from 696795-698369, Verified ORF	YMR215W	0.00856794	-100		YCL064C CHA1 SGDID:S0000569, Chr III from 16880-15798, reverse complement, Verified ORF	YCL064C	-100	0.000133829
YER069W ARG5,6 SGDID:S0000871, Chr V from 295408-297999, Verified ORF	YER069W	0.110687	-100		YPR019W CDC54 SGDID:S0006223, Chr XVI from 596747-599548, Verified ORF	YPR019W	0.0077575	-100		YBR059C AKL1 SGDID:S0000263, Chr II from 360185-356859, reverse complement, Verified ORF	YBR059C	-100	0.000128977
YLR409C UTP21 SGDID:S0004401, Chr XII from 937230-934411, reverse complement, Uncharacterized ORF	YLR409C	0.109982	-100		YHR082C KSP1 SGDID:S0001124, Chr VIII from 271549-268460, reverse complement, Verified ORF	YHR082C	0.00764929	-100		YLL002W RTT109 SGDID:S0003925, Chr XII from 146290-147600, Verified ORF	YLL002W	-100	0.000104799
YMR081C ISF1 SGDID:S0004686, Chr XIII from 431094-430078, reverse complement, Verified ORF	YMR081C	0.10716	-100		YBR149W ARA1 SGDID:S0000353, Chr II from 539981-541015, Verified ORF	YBR149W	0.00742376	-100		YGL253W HXK2 SGDID:S0003222, Chr VII from 23935-25395, Verified ORF	YGL253W	-100	7.7836e-05
YER080W FMP29 SGDID:S0000882, Chr V from 319959-321842, Uncharacterized ORF	YER080W	0.0996182	-100		YMR203W TOM40 SGDID:S0004816, Chr XIII from 668491-669654, Verified ORF	YMR203W	0.00725513	-100		YBR211C AME1 SGDID:S0000415, Chr II from 647127-646153, reverse complement, Verified ORF	YBR211C	-100	7.41084e-05
YOL115W TRF4 SGDID:S0005475, Chr XV from 101474-103228, Verified ORF	YOL115W	0.0984298	-100		YOR153W PDR5 SGDID:S0005679, Chr XV from 619840-624375, Verified ORF	YOR153W	0.00708456	-100		YLR234W TOP3 SGDID:S0004224, Chr XII from 609785-611755, Verified ORF	YLR234W	-100	4.72799e-05
YHR158C KEL1 SGDID:S0001201, Chr VIII from 417181-413687, reverse complement, Verified ORF	YHR158C	0.0974815	-100		YFR023W PES4 SGDID:S0001919, Chr VI from 199862-201697, Verified ORF	YFR023W	0.00688205	-100		YKR002W PAP1 SGDID:S0001710, Chr XI from 442875-444581, Verified ORF	YKR002W	-100	4.06522e-05
YNL027W CRZ1 SGDID:S0004972, Chr XIV from 579579-581615, Verified ORF	YNL027W	0.0967744	-100		YPL089C RLM1 SGDID:S0006010, Chr XVI from 381147-379117, reverse complement, Verified ORF	YPL089C	0.00678536	-100		YNL032W SIW14 SGDID:S0004977, Chr XIV from 574505-575350, Verified ORF	YNL032W	-100	3.73304e-05
YKL189W HYM1 SGDID:S0001672, Chr XI from 84709-85908, Verified ORF	YKL189W	0.0945545	-100		YNL253W TEX1 SGDID:S0005197, Chr XIV from 170017-171285, Verified ORF	YNL253W	0.00540906	-100		YDL201W TRM8 SGDID:S0002360, Chr IV from 99562-100422, Verified ORF	YDL201W	-100	2.62658e-05
YER129W PAK1 SGDID:S0000931, Chr V from 417277-420705, Verified ORF	YER129W	0.0901377	-100		YDR458C YDR458C SGDID:S0002866, Chr IV from 1382036-1380045, reverse complement, Uncharacterized ORF	YDR458C	0.00515571	-100		YHR056C RSC30 SGDID:S0001098, Chr VIII from 217835-215184, reverse complement, Verified ORF	YHR056C	-100	2.2481e-05
YIL044C AGE2 SGDID:S0001306, Chr IX from 273845-272949, reverse complement, Verified ORF	YIL044C	0.0891331	-100		YBL105C PKC1 SGDID:S0000201, Chr II from 17696-14241, reverse complement, Verified ORF	YBL105C	0.00515115	-100		YJL050W MTR4 SGDID:S0003586, Chr X from 342438-345659, Verified ORF	YJL050W	-100	2.13867e-05
YNL314W DAL82 SGDID:S0005258, Chr XIV from 44446-45213, Verified ORF	YNL314W	0.0871498	-100		YHR098C SFB3 SGDID:S0001140, Chr VIII from 301936-299147, reverse complement, Verified ORF	YHR098C	0.00505792	-100		YIL030C SSM4 SGDID:S0001292, Chr IX from 300008-296049, reverse complement, Verified ORF	YIL030C	-100	1.93087e-05
YDR188W CCT6 SGDID:S0002596, Chr IV from 836416-838056, Verified ORF	YDR188W	0.0823576	-100		YNL110C NOP15 SGDID:S0005054, Chr XIV from 418488-417826, reverse complement, Verified ORF	YNL110C	0.0048228	-100		YPR160W GPH1 SGDID:S0006364, Chr XVI from 861302-864010, Verified ORF	YPR160W	-100	1.56459e-05
YKL104C GFA1 SGDID:S0001587, Chr XI from 245019-242866, reverse complement, Verified ORF	YKL104C	0.0777377	-100		YOL122C SMF1 SGDID:S0005482, Chr XV from 91418-89691, reverse complement, Verified ORF	YOL122C	0.00429382	-100		YJL130C URA2 SGDID:S0003666, Chr X from 172285-165641, reverse complement, Verified ORF	YJL130C	-100	1.27114e-05
YOR267C HRK1 SGDID:S0005793, Chr XV from 824864-822585, reverse complement, Verified ORF	YOR267C	0.0764213	-100		YNR048W YNR048W SGDID:S0005331, Chr XIV from 711630-712811, Uncharacterized ORF	YNR048W	0.00401746	-100		YLR430W SEN1 SGDID:S0004422, Chr XII from 993430-1000125, Verified ORF	YLR430W	-100	9.05723e-06
YBL032W HEK2 SGDID:S0000128, Chr II from 160187-161332, Verified ORF	YBL032W	0.0760539	-100		YNL265C IST1 SGDID:S0005209, Chr XIV from 145280-145254,145148-144279, reverse complement, Verified ORF	YNL265C	0.00387789	-100		YDL199C YDL199C SGDID:S0002358, Chr IV from 103354-101291, reverse complement, Uncharacterized ORF	YDL199C	-100	8.41173e-06
YKL160W ELF1 SGDID:S0001643, Chr XI from 153274-153711, Uncharacterized ORF	YKL160W	0.07203	-100		YPL116W HOS3 SGDID:S0006037, Chr XVI from 329605-331698, Verified ORF	YPL116W	0.00380871	-100		YDR371W CTS2 SGDID:S0002779, Chr IV from 1219403-1220938, Uncharacterized ORF	YDR371W	-100	8.3287e-06
YKL012W PRP40 SGDID:S0001495, Chr XI from 417953-419704, Verified ORF	YKL012W	0.0694357	-100		YBR288C APM3 SGDID:S0000492, Chr II from 779459-778008, reverse complement, Verified ORF	YBR288C	0.00376126	-100		YDL236W PHO13 SGDID:S0002395, Chr IV from 32296-33234, Verified ORF	YDL236W	-100	7.66325e-06
YLR109W AHP1 SGDID:S0004099, Chr XII from 368782-369312, Verified ORF	YLR109W	0.067284	-100		YDL225W SHS1 SGDID:S0002384, Chr IV from 52446-54101, Verified ORF	YDL225W	0.00366711	-100		YHR007C ERG11 SGDID:S0001049, Chr VIII from 121677-120085, reverse complement, Verified ORF	YHR007C	-100	4.98354e-06
YMR177W MMT1 SGDID:S0004789, Chr XIII from 616565-618097, Verified ORF	YMR177W	0.0588017	-100		YPR005C HAL1 SGDID:S0006209, Chr XVI from 566668-565784, reverse complement, Verified ORF	YPR005C	0.00362007	-100		YOR157C PUP1 SGDID:S0005683, Chr XV from 631751-630966, reverse complement, Verified ORF	YOR157C	-100	4.62135e-06
YKL211C TRP3 SGDID:S0001694, Chr XI from 38154-36700, reverse complement, Verified ORF	YKL211C	0.0585868	-100		YDR439W LRS4 SGDID:S0002847, Chr IV from 1339666-1340709, Verified ORF	YDR439W	0.00360901	-100		YAL018C YAL018C SGDID:S0000016, Chr I from 119542-118565, reverse complement, Uncharacterized ORF	YAL018C	-100	4.52347e-06
YKL099C UTP11 SGDID:S0001582, Chr XI from 256117-255347, reverse complement, Verified ORF	YKL099C	0.0582574	-100		YDR034C LYS14 SGDID:S0002441, Chr IV from 512105-509733, reverse complement, Verified ORF	YDR034C	0.00358219	-100		YMR218C TRS130 SGDID:S0004831, Chr XIII from 706886-703578, reverse complement, Verified ORF	YMR218C	-100	3.01495e-06
YNL299W TRF5 SGDID:S0005243, Chr XIV from 66516-68393, Verified ORF	YNL299W	0.0570839	-100		YOL045W PSK2 SGDID:S0005405, Chr XV from 243495-246800, Verified ORF	YOL045W	0.00347543	-100		YPL150W YPL150W SGDID:S0006071, Chr XVI from 268187-270892, Uncharacterized ORF	YPL150W	-100	2.99438e-06
YPR173C VPS4 SGDID:S0006377, Chr XVI from 887833-886520, reverse complement, Verified ORF	YPR173C	0.0550987	-100		YGL206C CHC1 SGDID:S0003174, Chr VII from 107508-102547, reverse complement, Verified ORF	YGL206C	0.00341965	-100		YGR171C MSM1 SGDID:S0003403, Chr VII from 842556-840829, reverse complement, Verified ORF	YGR171C	-100	1.8453e-06
YGR038W ORM1 SGDID:S0003270, Chr VII from 560686-561354, Verified ORF	YGR038W	0.0534418	-100		YBR152W SPP381 SGDID:S0000356, Chr II from 546370-547245, Verified ORF	YBR152W	0.0033604	-100		YNL288W CAF40 SGDID:S0005232, Chr XIV from 90301-91422, Verified ORF	YNL288W	-100	1.76086e-06
YLR058C SHM2 SGDID:S0004048, Chr XII from 259402-257993, reverse complement, Verified ORF	YLR058C	0.0506841	-100		YIL151C YIL151C SGDID:S0001413, Chr IX from 60694-57338, reverse complement, Uncharacterized ORF	YIL151C	0.00329432	-100		YJR141W YJR141W SGDID:S0003902, Chr X from 695821-696864, Uncharacterized ORF	YJR141W	-100	1.27565e-06
YGL136C MRM2 SGDID:S0003104, Chr VII from 253864-252902, reverse complement, Verified ORF	YGL136C	0.0502408	-100		YDR146C SWI5 SGDID:S0002553, Chr IV from 750737-748608, reverse complement, Verified ORF	YDR146C	0.00322022	-100		YJR035W RAD26 SGDID:S0003796, Chr X from 497269-500526, Verified ORF	YJR035W	-100	8.04052e-07
YPL152W RRD2 SGDID:S0006073, Chr XVI from 265027-266103, Verified ORF	YPL152W	0.0484002	-100		YLR370C ARC18 SGDID:S0004362, Chr XII from 862253-861717, reverse complement, Verified ORF	YLR370C	0.00300276	-100		YDR132C YDR132C SGDID:S0002539, Chr IV from 720298-718811, reverse complement, Uncharacterized ORF	YDR132C	-100	5.83801e-07
YIL042C YIL042C SGDID:S0001304, Chr IX from 276291-275107, reverse complement, Uncharacterized ORF	YIL042C	0.0475875	-100		YDR179W-A YDR179W-A SGDID:S0002587, Chr IV from 819428-820819, Uncharacterized ORF	YDR179W-A	0.00260711	-100		YPR184W GDB1 SGDID:S0006388, Chr XVI from 902040-906650, Verified ORF	YPR184W	-100	5.51397e-07
YMR032W HOF1 SGDID:S0004635, Chr XIII from 335297-337306, Verified ORF	YMR032W	0.0431297	-100		YPL045W VPS16 SGDID:S0005966, Chr XVI from 467257-469653, Verified ORF	YPL045W	0.0024141	-100		YMR101C SRT1 SGDID:S0004707, Chr XIII from 469475-468444, reverse complement, Verified ORF	YMR101C	-100	4.54004e-07
YPR029C APL4 SGDID:S0006233, Chr XVI from 626964-624466, reverse complement, Verified ORF	YPR029C	0.0413902	-100		YER145C FTR1 SGDID:S0000947, Chr V from 461735-460521, reverse complement, Verified ORF	YER145C	0.0023625	-100		YKR085C MRPL20 SGDID:S0001793, Chr XI from 599323-598736, reverse complement, Verified ORF	YKR085C	-100	2.22479e-07
YOR219C STE13 SGDID:S0005745, Chr XV from 755009-752214, reverse complement, Verified ORF	YOR219C	0.0380463	-100		YIL033C BCY1 SGDID:S0001295, Chr IX from 291668-290418, reverse complement, Verified ORF	YIL033C	0.00223984	-100		YBR034C HMT1 SGDID:S0000238, Chr II from 305976-304930, reverse complement, Verified ORF	YBR034C	-100	8.1578e-08
YLR405W DUS4 SGDID:S0004397, Chr XII from 929787-930890, Uncharacterized ORF	YLR405W	0.0371354	-100		YGL166W CUP2 SGDID:S0003134, Chr VII from 191135-191812, Verified ORF	YGL166W	0.00220679	-100		YDR171W HSP42 SGDID:S0002578, Chr IV from 806616-807743, Verified ORF	YDR171W	-100	7.48139e-08
YJR056C YJR056C SGDID:S0003817, Chr X from 542416-541706, reverse complement, Uncharacterized ORF	YJR056C	0.0366338	-100		YKL175W ZRT3 SGDID:S0001658, Chr XI from 118798-120309, Verified ORF	YKL175W	0.00204831	-100		YLL027W ISA1 SGDID:S0003950, Chr XII from 87402-88154, Verified ORF	YLL027W	-100	7.31233e-08
YJR089W BIR1 SGDID:S0003849, Chr X from 587632-590496, Verified ORF	YJR089W	0.0337591	-100		YHR131C YHR131C SGDID:S0001173, Chr VIII from 367894-365342, reverse complement, Uncharacterized ORF	YHR131C	0.0020371	-100		YBR086C IST2 SGDID:S0000290, Chr II from 423035-420195, reverse complement, Verified ORF	YBR086C	-100	5.84205e-08
YGL175C SAE2 SGDID:S0003143, Chr VII from 174328-173291, reverse complement, Verified ORF	YGL175C	0.0335635	-100		YER078C YER078C SGDID:S0000880, Chr V from 318338-316803, reverse complement, Uncharacterized ORF	YER078C	0.00184193	-100		YNR045W PET494 SGDID:S0005328, Chr XIV from 706139-707608, Verified ORF	YNR045W	-100	4.98548e-08
YLR310C CDC25 SGDID:S0004301, Chr XII from 756995-752226, reverse complement, Verified ORF	YLR310C	0.0330201	-100		YMR306W FKS3 SGDID:S0004923, Chr XIII from 881158-886515, Verified ORF	YMR306W	0.00180853	-100		YOR191W RIS1 SGDID:S0005717, Chr XV from 692475-697334, Verified ORF	YOR191W	-100	4.46918e-08
YOR113W AZF1 SGDID:S0005639, Chr XV from 534075-536819, Verified ORF	YOR113W	0.0329449	-100		YOL095C HMI1 SGDID:S0005455, Chr XV from 141346-139226, reverse complement, Verified ORF	YOL095C	0.00172593	-100		YOL142W RRP40 SGDID:S0005502, Chr XV from 55556-56278, Verified ORF	YOL142W	-100	4.24841e-08
YHR159W YHR159W SGDID:S0001202, Chr VIII from 417551-419065, Uncharacterized ORF	YHR159W	0.0296625	-100		YDR350C TCM10 SGDID:S0002758, Chr IV from 1178165-1176330, reverse complement, Verified ORF	YDR350C	0.00172593	-100		YOR152C YOR152C SGDID:S0005678, Chr XV from 618288-617518, reverse complement, Uncharacterized ORF	YOR152C	-100	3.4172e-08
YKL038W RGT1 SGDID:S0001521, Chr XI from 365248-368760, Verified ORF	YKL038W	0.0295641	-100		YJR126C VPS70 SGDID:S0003887, Chr X from 658604-656169, reverse complement, Verified ORF	YJR126C	0.00163803	-100		YKL184W SPE1 SGDID:S0001667, Chr XI from 96762-98162, Verified ORF	YKL184W	-100	2.83502e-08
YPL207W YPL207W SGDID:S0006128, Chr XVI from 159908-162340, Uncharacterized ORF	YPL207W	0.0274643	-100		YGR148C RPL24B SGDID:S0003380, Chr VII from 787784-787317, reverse complement, Verified ORF	YGR148C	0.00156653	-100		YBR129C OPY1 SGDID:S0000333, Chr II from 495333-494347, reverse complement, Verified ORF	YBR129C	-100	2.71957e-08
YDL198C GGC1 SGDID:S0002357, Chr IV from 104552-103650, reverse complement, Verified ORF	YDL198C	0.0267972	-100		YPR114W YPR114W SGDID:S0006318, Chr XVI from 753299-754246, Uncharacterized ORF	YPR114W	0.00154365	-100		YDR208W MSS4 SGDID:S0002616, Chr IV from 868219-870558, Verified ORF	YDR208W	-100	1.81413e-08
YBR175W SWD3 SGDID:S0000379, Chr II from 582403-583350, Verified ORF	YBR175W	0.0258133	-100		YDR353W TRR1 SGDID:S0002761, Chr IV from 1183290-1184249, Verified ORF	YDR353W	0.00151029	-100		YGL140C YGL140C SGDID:S0003108, Chr VII from 245017-241358, reverse complement, Uncharacterized ORF	YGL140C	-100	1.77439e-08
YPL224C MMT2 SGDID:S0006145, Chr XVI from 128087-126738, reverse complement, Verified ORF	YPL224C	0.0254681	-100		YHR088W RPF1 SGDID:S0001130, Chr VIII from 281496-282383, Verified ORF	YHR088W	0.00149979	-100		YKL025C PAN3 SGDID:S0001508, Chr XI from 391922-389883, reverse complement, Verified ORF	YKL025C	-100	1.4713e-08
YDR247W VHS1 SGDID:S0002655, Chr IV from 956007-957392, Verified ORF	YDR247W	0.023523	-100		YBR250W YBR250W SGDID:S0000454, Chr II from 719028-720599, Uncharacterized ORF	YBR250W	0.00147333	-100		YLR381W CTF3 SGDID:S0004373, Chr XII from 879723-881924, Verified ORF	YLR381W	-100	7.79707e-09
YIR034C LYS1 SGDID:S0001473, Chr IX from 420733-419612, reverse complement, Verified ORF	YIR034C	0.0234278	-100		YMR269W YMR269W SGDID:S0004882, Chr XIII from 804455-805090, Uncharacterized ORF	YMR269W	0.00147103	-100		YJR131W MNS1 SGDID:S0003892, Chr X from 667559-669208, Verified ORF	YJR131W	-100	7.762e-09
YDL161W ENT1 SGDID:S0002320, Chr IV from 167715-169079, Verified ORF	YDL161W	0.0232043	-100		YGL190C CDC55 SGDID:S0003158, Chr VII from 147395-145815, reverse complement, Verified ORF	YGL190C	0.00128922	-100		YOR066W YOR066W SGDID:S0005592, Chr XV from 449437-451326, Uncharacterized ORF	YOR066W	-100	7.762e-09
YBR196C PGI1 SGDID:S0000400, Chr II from 613895-612231, reverse complement, Verified ORF	YBR196C	0.0222663	-100		YKL005C BYE1 SGDID:S0001488, Chr XI from 434520-432736, reverse complement, Verified ORF	YKL005C	0.0012859	-100		YGR140W CBF2 SGDID:S0003372, Chr VII from 767434-770304, Verified ORF	YGR140W	-100	6.70545e-09
YKL035W UGP1 SGDID:S0001518, Chr XI from 369534-371033, Verified ORF	YKL035W	0.0211439	-100		YBR203W COS111 SGDID:S0000407, Chr II from 629163-631937, Verified ORF	YBR203W	0.00119476	-100		YJR072C NPA3 SGDID:S0003833, Chr X from 572038-570881, reverse complement, Verified ORF	YJR072C	-100	4.58854e-09
YOR174W MED4 SGDID:S0005700, Chr XV from 658747-659601, Verified ORF	YOR174W	0.0209759	-100		YPR069C SPE3 SGDID:S0006273, Chr XVI from 685434-684553, reverse complement, Verified ORF	YPR069C	0.00118841	-100		YKL176C LST4 SGDID:S0001659, Chr XI from 117991-115505, reverse complement, Verified ORF	YKL176C	-100	1.86054e-09
YOL053W YOL053W SGDID:S0005414, Chr XV from 230083-231270, Uncharacterized ORF	YOL053W	0.0207547	-100		YNL095C YNL095C SGDID:S0005039, Chr XIV from 446840-444912, reverse complement, Uncharacterized ORF	YNL095C	0.00113938	-100		YPL244C HUT1 SGDID:S0006165, Chr XVI from 88033-87014, reverse complement, Verified ORF	YPL244C	-100	1.72244e-09
YOR349W CIN1 SGDID:S0005876, Chr XV from 989784-992828, Verified ORF	YOR349W	0.0195716	-100		YOR341W RPA190 SGDID:S0005868, Chr XV from 960982-965976, Verified ORF	YOR341W	0.00108712	-100		YDL020C RPN4 SGDID:S0002178, Chr IV from 416705-415110, reverse complement, Verified ORF	YDL020C	-100	1.5706e-09
YDR422C SIP1 SGDID:S0002830, Chr IV from 1317907-1315316, reverse complement, Verified ORF	YDR422C	0.0192858	-100		YNL074C MLF3 SGDID:S0005018, Chr XIV from 488123-486765, reverse complement, Verified ORF	YNL074C	0.0010785	-100		YGR138C TPO2 SGDID:S0003370, Chr VII from 765611-763767, reverse complement, Verified ORF	YGR138C	-100	1.22074e-09
YJL083W YJL083W SGDID:S0003619, Chr X from 278757-280571, Uncharacterized ORF	YJL083W	0.0183321	-100		YDR473C PRP3 SGDID:S0002881, Chr IV from 1405844-1404435, reverse complement, Verified ORF	YDR473C	0.000993496	-100		YAL026C DRS2 SGDID:S0000024, Chr I from 99698-95631, reverse complement, Verified ORF	YAL026C	-100	1.07024e-09
YLR431C ATG23 SGDID:S0004423, Chr XII from 1001699-1000338, reverse complement, Verified ORF	YLR431C	0.0176145	-100		YDR037W KRS1 SGDID:S0002444, Chr IV from 525436-527211, Verified ORF	YDR037W	0.000903998	-100		YDR180W SCC2 SGDID:S0002588, Chr IV from 821290-825771, Verified ORF	YDR180W	-100	3.93735e-10
YHR073W OSH3 SGDID:S0001115, Chr VIII from 242583-245573, Verified ORF	YHR073W	0.0172584	-100		YDL171C GLT1 SGDID:S0002330, Chr IV from 155641-149204, reverse complement, Verified ORF	YDL171C	0.000781371	-100		YML018C YML018C SGDID:S0004480, Chr XIII from 235952-234771, reverse complement, Uncharacterized ORF	YML018C	-100	3.0944e-10
YBR108W YBR108W SGDID:S0000312, Chr II from 454816-457659, Uncharacterized ORF	YBR108W	0.0170844	-100		YMR229C RRP5 SGDID:S0004842, Chr XIII from 731122-725933, reverse complement, Verified ORF	YMR229C	0.000672301	-100		YNL012W SPO1 SGDID:S0004957, Chr XIV from 609685-609789,609874-611664, Verified ORF	YNL012W	-100	8.04565e-11
YOR202W HIS3 SGDID:S0005728, Chr XV from 721946-722608, Verified ORF	YOR202W	0.0169811	-100		YNL069C RPL16B SGDID:S0005013, Chr XIV from 495000-494973,494523-493955, reverse complement, Verified ORF	YNL069C	0.000625872	-100		YPR156C TPO3 SGDID:S0006360, Chr XVI from 839773-837905, reverse complement, Verified ORF	YPR156C	-100	4.04419e-11
YNL053W MSG5 SGDID:S0004998, Chr XIV from 529941-531410, Verified ORF	YNL053W	0.0162635	-100		YDL195W SEC31 SGDID:S0002354, Chr IV from 107209-111030, Verified ORF	YDL195W	0.000608127	-100		YOL076W MDM20 SGDID:S0005436, Chr XV from 187023-189413, Verified ORF	YOL076W	-100	4.82825e-12
YDR406W PDR15 SGDID:S0002814, Chr IV from 1279200-1283789, Verified ORF	YDR406W	0.0153941	-100		YNL293W MSB3 SGDID:S0005237, Chr XIV from 80638-82539, Verified ORF	YNL293W	0.000587582	-100		YGR231C PHB2 SGDID:S0003463, Chr VII from 953482-952550, reverse complement, Verified ORF	YGR231C	-100	1.32983e-12
YOR048C RAT1 SGDID:S0005574, Chr XV from 421650-418630, reverse complement, Verified ORF	YOR048C	0.0139287	-100		YMR190C SGS1 SGDID:S0004802, Chr XIII from 645257-640914, reverse complement, Verified ORF	YMR190C	0.000577541	-100		YDL047W SIT4 SGDID:S0002205, Chr IV from 369769-370704, Verified ORF	YDL047W	-100	9.80105e-13
YPL063W TIM50 SGDID:S0005984, Chr XVI from 429936-431366, Verified ORF	YPL063W	0.013789	-100		YDR466W PKH3 SGDID:S0002874, Chr IV from 1395111-1397807, Verified ORF	YDR466W	0.000549882	-100		YLR304C ACO1 SGDID:S0004295, Chr XII from 737550-735214, reverse complement, Verified ORF	YLR304C	-100	9.11382e-13
YNL006W LST8 SGDID:S0004951, Chr XIV from 620067-620978, Verified ORF	YNL006W	0.0130456	-100		YPR024W YME1 SGDID:S0006228, Chr XVI from 610478-612721, Verified ORF	YPR024W	0.000519439	-100		YIL112W HOS4 SGDID:S0001374, Chr IX from 151592-154843, Uncharacterized ORF	YIL112W	-100	1.11022e-15
YER167W BCK2 SGDID:S0000969, Chr V from 518211-520766, Verified ORF	YER167W	0.0123878	-100		YDL153C SAS10 SGDID:S0002312, Chr IV from 183019-181187, reverse complement, Verified ORF	YDL153C	0.000465679	-100		YBL034C STU1 SGDID:S0000130, Chr II from 158392-153851, reverse complement, Verified ORF	YBL034C	-100	0
YLR347C KAP95 SGDID:S0004339, Chr XII from 826412-823827, reverse complement, Verified ORF	YLR347C	0.0122819	-100		YGL031C RPL24A SGDID:S0002999, Chr VII from 437939-437472, reverse complement, Verified ORF	YGL031C	0.000447195	-100		YBL058W SHP1 SGDID:S0000154, Chr II from 111439-112710, Verified ORF	YBL058W	-100	0
YGL035C MIG1 SGDID:S0003003, Chr VII from 433067-431553, reverse complement, Verified ORF	YGL035C	0.0118773	-100		YML081W YML081W SGDID:S0004546, Chr XIII from 104777-108532, Uncharacterized ORF	YML081W	0.00044664	-100		YBR004C FMP44 SGDID:S0000208, Chr II from 245669-244368, reverse complement, Uncharacterized ORF	YBR004C	-100	0
YAL024C LTE1 SGDID:S0000022, Chr I from 105873-101566, reverse complement, Verified ORF	YAL024C	0.0109803	-100		YEL047C YEL047C SGDID:S0000773, Chr V from 66797-65385, reverse complement, Uncharacterized ORF	YEL047C	0.000432039	-100		YBR074W YBR074W SGDID:S0000278, Chr II from 386281-389211, Uncharacterized ORF	YBR074W	-100	0
YGL172W NUP49 SGDID:S0003140, Chr VII from 180706-182124, Verified ORF	YGL172W	0.0108171	-100		YKL165C MCD4 SGDID:S0001648, Chr XI from 140696-137937, reverse complement, Verified ORF	YKL165C	0.000415699	-100		YDL160C DHH1 SGDID:S0002319, Chr IV from 171931-170411, reverse complement, Verified ORF	YDL160C	-100	0
YKL064W MNR2 SGDID:S0001547, Chr XI from 317409-320318, Verified ORF	YKL064W	0.0106685	-100		YLR087C CSF1 SGDID:S0004077, Chr XII from 315732-306856, reverse complement, Verified ORF	YLR087C	0.000385652	-100		YDR113C PDS1 SGDID:S0002520, Chr IV from 681612-680491, reverse complement, Verified ORF	YDR113C	-100	0
YDR117C YDR117C SGDID:S0002524, Chr IV from 685638-683941, reverse complement, Uncharacterized ORF	YDR117C	0.0105418	-100		YLR206W ENT2 SGDID:S0004196, Chr XII from 554580-556421, Verified ORF	YLR206W	0.000346341	-100		YDR245W MNN10 SGDID:S0002653, Chr IV from 952794-953975, Verified ORF	YDR245W	-100	0
YDR049W YDR049W SGDID:S0002456, Chr IV from 553251-555149, Uncharacterized ORF	YDR049W	0.0103825	-100		YOR326W MYO2 SGDID:S0005853, Chr XV from 925716-930440, Verified ORF	YOR326W	0.000336498	-100		YDR275W BSC2 SGDID:S0002683, Chr IV from 1012246-1012953, Verified ORF	YDR275W	-100	0
YDR443C SSN2 SGDID:S0002851, Chr IV from 1349928-1345666, reverse complement, Verified ORF	YDR443C	0.0102116	-100		YMR300C ADE4 SGDID:S0004915, Chr XIII from 867090-865558, reverse complement, Verified ORF	YMR300C	0.000308303	-100		YDR520C YDR520C SGDID:S0002928, Chr IV from 1483393-1481075, reverse complement, Uncharacterized ORF	YDR520C	-100	0
YOL006C TOP1 SGDID:S0005366, Chr XV from 315387-313078, reverse complement, Verified ORF	YOL006C	0.00977735	-100		YLR439W MRPL4 SGDID:S0004431, Chr XII from 1014487-1015446, Verified ORF	YLR439W	0.000293582	-100		YEL025C YEL025C SGDID:S0000751, Chr V from 106147-102581, reverse complement, Uncharacterized ORF	YEL025C	-100	0
YMR058W FET3 SGDID:S0004662, Chr XIII from 388821-390731, Verified ORF	YMR058W	0.0097363	-100		YPL215W CBP3 SGDID:S0006136, Chr XVI from 147415-148422, Verified ORF	YPL215W	0.000236743	-100		YEL064C AVT2 SGDID:S0000790, Chr V from 31239-29797, reverse complement, Verified ORF	YEL064C	-100	0
YDR341C YDR341C SGDID:S0002749, Chr IV from 1153618-1151795, reverse complement, Verified ORF	YDR341C	0.0091724	-100		YBR047W FMP23 SGDID:S0000251, Chr II from 331831-332358, Uncharacterized ORF	YBR047W	0.00023312	-100		YGR015C YGR015C SGDID:S0003247, Chr VII from 522080-521094, reverse complement, Uncharacterized ORF	YGR015C	-100	0
YJL093C TOK1 SGDID:S0003629, Chr X from 256728-254653, reverse complement, Verified ORF	YJL093C	0.00868255	-100		YJL080C SCP160 SGDID:S0003616, Chr X from 289142-285474, reverse complement, Verified ORF	YJL080C	0.000224117	-100		YGR041W BUD9 SGDID:S0003273, Chr VII from 577491-579134, Verified ORF	YGR041W	-100	0
YEL053C MAK10 SGDID:S0000779, Chr V from 56102-53901, reverse complement, Verified ORF	YEL053C	0.00863042	-100		YHR137W ARO9 SGDID:S0001179, Chr VIII from 375711-377252, Verified ORF	YHR137W	0.000211412	-100		YHR149C SKG6 SGDID:S0001192, Chr VIII from 396661-394457, reverse complement, Uncharacterized ORF	YHR149C	-100	0
YMR215W GAS3 SGDID:S0004828, Chr XIII from 696795-698369, Verified ORF	YMR215W	0.00856794	-100		YIL133C RPL16A SGDID:S0001395, Chr IX from 99416-99386,99095-98527, reverse complement, Verified ORF	YIL133C	0.000201741	-100		YHR160C PEX18 SGDID:S0001203, Chr VIII from 420074-419223, reverse complement, Verified ORF	YHR160C	-100	0
YPR019W CDC54 SGDID:S0006223, Chr XVI from 596747-599548, Verified ORF	YPR019W	0.0077575	-100		YHR017W YSC83 SGDID:S0001059, Chr VIII from 138686-139843, Verified ORF	YHR017W	0.000197579	-100		YIL005W EPS1 SGDID:S0001267, Chr IX from 345689-347794, Verified ORF	YIL005W	-100	0
YHR082C KSP1 SGDID:S0001124, Chr VIII from 271549-268460, reverse complement, Verified ORF	YHR082C	0.00764929	-100		YML007W YAP1 SGDID:S0004466, Chr XIII from 253848-255800, Verified ORF	YML007W	0.000176064	-100		YJL134W LCB3 SGDID:S0003670, Chr X from 158106-159335, Verified ORF	YJL134W	-100	0
YBR149W ARA1 SGDID:S0000353, Chr II from 539981-541015, Verified ORF	YBR149W	0.00742376	-100		YGL113W SLD3 SGDID:S0003081, Chr VII from 295935-297941, Verified ORF	YGL113W	0.000152996	-100		YJL193W YJL193W SGDID:S0003729, Chr X from 71365-72573, Uncharacterized ORF	YJL193W	-100	0
YMR203W TOM40 SGDID:S0004816, Chr XIII from 668491-669654, Verified ORF	YMR203W	0.00725513	-100		YNR019W ARE2 SGDID:S0005302, Chr XIV from 665339-667267, Verified ORF	YNR019W	0.000148881	-100		YJR094C IME1 SGDID:S0003854, Chr X from 605568-604486, reverse complement, Verified ORF	YJR094C	-100	0
YOR153W PDR5 SGDID:S0005679, Chr XV from 619840-624375, Verified ORF	YOR153W	0.00708456	-100		YPR084W YPR084W SGDID:S0006288, Chr XVI from 706970-708340, Uncharacterized ORF	YPR084W	0.000143279	-100		YJR106W ECM27 SGDID:S0003867, Chr X from 624751-626928, Verified ORF	YJR106W	-100	0
YFR023W PES4 SGDID:S0001919, Chr VI from 199862-201697, Verified ORF	YFR023W	0.00688205	-100		YCR019W MAK32 SGDID:S0000612, Chr III from 152834-153925, Verified ORF	YCR019W	0.000137058	-100		YJR110W YMR1 SGDID:S0003871, Chr X from 633530-635596, Uncharacterized ORF	YJR110W	-100	0
YPL089C RLM1 SGDID:S0006010, Chr XVI from 381147-379117, reverse complement, Verified ORF	YPL089C	0.00678536	-100		YNL132W KRE33 SGDID:S0005076, Chr XIV from 375321-378491, Verified ORF	YNL132W	0.000132196	-100		YJR127C ZMS1 SGDID:S0003888, Chr X from 662974-658832, reverse complement, Verified ORF	YJR127C	-100	0
YNL253W TEX1 SGDID:S0005197, Chr XIV from 170017-171285, Verified ORF	YNL253W	0.00540906	-100		YDR348C YDR348C SGDID:S0002756, Chr IV from 1171817-1170318, reverse complement, Uncharacterized ORF	YDR348C	0.000128683	-100		YKL014C URB1 SGDID:S0001497, Chr XI from 416556-411262, reverse complement, Verified ORF	YKL014C	-100	0
YDR458C YDR458C SGDID:S0002866, Chr IV from 1382036-1380045, reverse complement, Uncharacterized ORF	YDR458C	0.00515571	-100		YOR290C SNF2 SGDID:S0005816, Chr XV from 860255-855144, reverse complement, Verified ORF	YOR290C	0.000114041	-100		YLR095C IOC2 SGDID:S0004085, Chr XII from 332116-329678, reverse complement, Verified ORF	YLR095C	-100	0
YBL105C PKC1 SGDID:S0000201, Chr II from 17696-14241, reverse complement, Verified ORF	YBL105C	0.00515115	-100		YIL107C PFK26 SGDID:S0001369, Chr IX from 165758-163275, reverse complement, Verified ORF	YIL107C	0.000114019	-100		YLR144C ACF2 SGDID:S0004134, Chr XII from 432017-429678, reverse complement, Verified ORF	YLR144C	-100	0
YHR098C SFB3 SGDID:S0001140, Chr VIII from 301936-299147, reverse complement, Verified ORF	YHR098C	0.00505792	-100		YGL131C SNT2 SGDID:S0003099, Chr VII from 265864-261653, reverse complement, Verified ORF	YGL131C	0.000106086	-100		YMR016C SOK2 SGDID:S0004618, Chr XIII from 305592-303235, reverse complement, Verified ORF	YMR016C	-100	0
YNL110C NOP15 SGDID:S0005054, Chr XIV from 418488-417826, reverse complement, Verified ORF	YNL110C	0.0048228	-100		YGL245W GUS1 SGDID:S0003214, Chr VII from 39023-41149, Verified ORF	YGL245W	0.0001036	-100		YMR070W MOT3 SGDID:S0004674, Chr XIII from 409153-410625, Verified ORF	YMR070W	-100	0
YOL122C SMF1 SGDID:S0005482, Chr XV from 91418-89691, reverse complement, Verified ORF	YOL122C	0.00429382	-100		YNL021W HDA1 SGDID:S0004966, Chr XIV from 593226-595346, Verified ORF	YNL021W	0.000103506	-100		YMR163C YMR163C SGDID:S0004773, Chr XIII from 586387-584270, reverse complement, Uncharacterized ORF	YMR163C	-100	0
YNR048W YNR048W SGDID:S0005331, Chr XIV from 711630-712811, Uncharacterized ORF	YNR048W	0.00401746	-100		YIL046W MET30 SGDID:S0001308, Chr IX from 268650-270572, Verified ORF	YIL046W	9.16562e-05	-100		YMR209C YMR209C SGDID:S0004822, Chr XIII from 687283-685910, reverse complement, Uncharacterized ORF	YMR209C	-100	0
YNL265C IST1 SGDID:S0005209, Chr XIV from 145280-145254,145148-144279, reverse complement, Verified ORF	YNL265C	0.00387789	-100		YNR018W YNR018W SGDID:S0005301, Chr XIV from 664270-664944, Uncharacterized ORF	YNR018W	8.26356e-05	-100		YNL124W NAF1 SGDID:S0005068, Chr XIV from 392892-394370, Verified ORF	YNL124W	-100	0
YPL116W HOS3 SGDID:S0006037, Chr XVI from 329605-331698, Verified ORF	YPL116W	0.00380871	-100		YCR048W ARE1 SGDID:S0000644, Chr III from 211924-213756, Verified ORF	YCR048W	7.99597e-05	-100		YNL213C YNL213C SGDID:S0005157, Chr XIV from 247103-246459, reverse complement, Uncharacterized ORF	YNL213C	-100	0
YBR288C APM3 SGDID:S0000492, Chr II from 779459-778008, reverse complement, Verified ORF	YBR288C	0.00376126	-100		YDR363W ESC2 SGDID:S0002771, Chr IV from 1199173-1200543, Verified ORF	YDR363W	7.45558e-05	-100		YNL223W ATG4 SGDID:S0005167, Chr XIV from 227369-228853, Verified ORF	YNL223W	-100	0
YDL225W SHS1 SGDID:S0002384, Chr IV from 52446-54101, Verified ORF	YDL225W	0.00366711	-100		YDR440W DOT1 SGDID:S0002848, Chr IV from 1342483-1344231, Verified ORF	YDR440W	7.34705e-05	-100		YNL232W CSL4 SGDID:S0005176, Chr XIV from 214922-215800, Verified ORF	YNL232W	-100	0
YPR005C HAL1 SGDID:S0006209, Chr XVI from 566668-565784, reverse complement, Verified ORF	YPR005C	0.00362007	-100		YDL205C HEM3 SGDID:S0002364, Chr IV from 93746-92763, reverse complement, Verified ORF	YDL205C	7.18834e-05	-100		YNL321W YNL321W SGDID:S0005265, Chr XIV from 34695-37421, Uncharacterized ORF	YNL321W	-100	0
YDR439W LRS4 SGDID:S0002847, Chr IV from 1339666-1340709, Verified ORF	YDR439W	0.00360901	-100		YDR500C RPL37B SGDID:S0002908, Chr IV from 1450843-1450837,1450447-1450188, reverse complement, Verified ORF	YDR500C	6.80334e-05	-100		YNL329C PEX6 SGDID:S0005273, Chr XIV from 22633-19541, reverse complement, Verified ORF	YNL329C	-100	0
YDR034C LYS14 SGDID:S0002441, Chr IV from 512105-509733, reverse complement, Verified ORF	YDR034C	0.00358219	-100		YIR035C YIR035C SGDID:S0001474, Chr IX from 421787-421023, reverse complement, Uncharacterized ORF	YIR035C	5.54793e-05	-100		YOL138C YOL138C SGDID:S0005498, Chr XV from 65349-61324, reverse complement, Uncharacterized ORF	YOL138C	-100	0
YOL045W PSK2 SGDID:S0005405, Chr XV from 243495-246800, Verified ORF	YOL045W	0.00347543	-100		YLR401C DUS3 SGDID:S0004393, Chr XII from 924447-922618, reverse complement, Uncharacterized ORF	YLR401C	5.51638e-05	-100		YOR002W ALG6 SGDID:S0005528, Chr XV from 329417-331051, Verified ORF	YOR002W	-100	0
YGL206C CHC1 SGDID:S0003174, Chr VII from 107508-102547, reverse complement, Verified ORF	YGL206C	0.00341965	-100		YLR209C PNP1 SGDID:S0004199, Chr XII from 561734-560799, reverse complement, Verified ORF	YLR209C	4.68625e-05	-100		YPL147W PXA1 SGDID:S0006068, Chr XVI from 273254-275866, Verified ORF	YPL147W	-100	0
YBR152W SPP381 SGDID:S0000356, Chr II from 546370-547245, Verified ORF	YBR152W	0.0033604	-100		YAR042W SWH1 SGDID:S0000081, Chr I from 192613-196179, Verified ORF	YAR042W	3.83562e-05	-100		YPL246C RBD2 SGDID:S0006167, Chr XVI from 85297-84509, reverse complement, Verified ORF	YPL246C	-100	0
YIL151C YIL151C SGDID:S0001413, Chr IX from 60694-57338, reverse complement, Uncharacterized ORF	YIL151C	0.00329432	-100		YOR117W RPT5 SGDID:S0005643, Chr XV from 545029-546333, Verified ORF	YOR117W	3.64918e-05	-100
YDR146C SWI5 SGDID:S0002553, Chr IV from 750737-748608, reverse complement, Verified ORF	YDR146C	0.00322022	-100		YFR027W ECO1 SGDID:S0001923, Chr VI from 207440-208285, Verified ORF	YFR027W	2.88393e-05	-100
YLR370C ARC18 SGDID:S0004362, Chr XII from 862253-861717, reverse complement, Verified ORF	YLR370C	0.00300276	-100		YDR103W STE5 SGDID:S0002510, Chr IV from 658345-661098, Verified ORF	YDR103W	2.78334e-05	-100
YDR179W-A YDR179W-A SGDID:S0002587, Chr IV from 819428-820819, Uncharacterized ORF	YDR179W-A	0.00260711	-100		YPL262W FUM1 SGDID:S0006183, Chr XVI from 47336-48802, Verified ORF	YPL262W	2.6217e-05	-100
YPL045W VPS16 SGDID:S0005966, Chr XVI from 467257-469653, Verified ORF	YPL045W	0.0024141	-100		YEL044W IES6 SGDID:S0000770, Chr V from 69757-70257, Verified ORF	YEL044W	2.21742e-05	-100
YER145C FTR1 SGDID:S0000947, Chr V from 461735-460521, reverse complement, Verified ORF	YER145C	0.0023625	-100		YKR098C UBP11 SGDID:S0001806, Chr XI from 634817-632664, reverse complement, Verified ORF	YKR098C	2.18471e-05	-100
YIL033C BCY1 SGDID:S0001295, Chr IX from 291668-290418, reverse complement, Verified ORF	YIL033C	0.00223984	-100		YOL017W ESC8 SGDID:S0005377, Chr XV from 292529-294673, Verified ORF	YOL017W	1.9361e-05	-100
YGL166W CUP2 SGDID:S0003134, Chr VII from 191135-191812, Verified ORF	YGL166W	0.00220679	-100		YEL022W GEA2 SGDID:S0000748, Chr V from 111421-115800, Verified ORF	YEL022W	1.69753e-05	-100
YKL175W ZRT3 SGDID:S0001658, Chr XI from 118798-120309, Verified ORF	YKL175W	0.00204831	-100		YOR353C SOG2 SGDID:S0005880, Chr XV from 1000823-998448, reverse complement, Uncharacterized ORF	YOR353C	1.63654e-05	-100
YHR131C YHR131C SGDID:S0001173, Chr VIII from 367894-365342, reverse complement, Uncharacterized ORF	YHR131C	0.0020371	-100		YOR289W YOR289W SGDID:S0005815, Chr XV from 853354-854109, Uncharacterized ORF	YOR289W	1.32153e-05	-100
YER078C YER078C SGDID:S0000880, Chr V from 318338-316803, reverse complement, Uncharacterized ORF	YER078C	0.00184193	-100		YDL045C FAD1 SGDID:S0002203, Chr IV from 373605-372685, reverse complement, Verified ORF	YDL045C	1.24996e-05	-100
YMR306W FKS3 SGDID:S0004923, Chr XIII from 881158-886515, Verified ORF	YMR306W	0.00180853	-100		YGR092W DBF2 SGDID:S0003324, Chr VII from 668193-669911, Verified ORF	YGR092W	1.07526e-05	-100
YOL095C HMI1 SGDID:S0005455, Chr XV from 141346-139226, reverse complement, Verified ORF	YOL095C	0.00172593	-100		YER093C TSC11 SGDID:S0000895, Chr V from 347608-343316, reverse complement, Verified ORF	YER093C	1.02737e-05	-100
YDR350C TCM10 SGDID:S0002758, Chr IV from 1178165-1176330, reverse complement, Verified ORF	YDR350C	0.00172593	-100		YGR241C YAP1802 SGDID:S0003473, Chr VII from 976586-974880, reverse complement, Verified ORF	YGR241C	1.02698e-05	-100
YJR126C VPS70 SGDID:S0003887, Chr X from 658604-656169, reverse complement, Verified ORF	YJR126C	0.00163803	-100		YBR236C ABD1 SGDID:S0000440, Chr II from 691688-690378, reverse complement, Verified ORF	YBR236C	1.00527e-05	-100
YGR148C RPL24B SGDID:S0003380, Chr VII from 787784-787317, reverse complement, Verified ORF	YGR148C	0.00156653	-100		YHR085W IPI1 SGDID:S0001127, Chr VIII from 276765-277769, Verified ORF	YHR085W	9.91644e-06	-100
YPR114W YPR114W SGDID:S0006318, Chr XVI from 753299-754246, Uncharacterized ORF	YPR114W	0.00154365	-100		YOR365C YOR365C SGDID:S0005892, Chr XV from 1025568-1023457, reverse complement, Uncharacterized ORF	YOR365C	8.76056e-06	-100
YDR353W TRR1 SGDID:S0002761, Chr IV from 1183290-1184249, Verified ORF	YDR353W	0.00151029	-100		YGR275W RTT102 SGDID:S0003507, Chr VII from 1043282-1043755, Verified ORF	YGR275W	8.42305e-06	-100
YHR088W RPF1 SGDID:S0001130, Chr VIII from 281496-282383, Verified ORF	YHR088W	0.00149979	-100		YMR034C YMR034C SGDID:S0004637, Chr XIII from 340721-339417, reverse complement, Uncharacterized ORF	YMR034C	7.94163e-06	-100
YBR250W YBR250W SGDID:S0000454, Chr II from 719028-720599, Uncharacterized ORF	YBR250W	0.00147333	-100		YBR195C MSI1 SGDID:S0000399, Chr II from 611877-610609, reverse complement, Verified ORF	YBR195C	7.29876e-06	-100
YMR269W YMR269W SGDID:S0004882, Chr XIII from 804455-805090, Uncharacterized ORF	YMR269W	0.00147103	-100		YJL084C YJL084C SGDID:S0003620, Chr X from 277918-274778, reverse complement, Verified ORF	YJL084C	7.28666e-06	-100
YGL190C CDC55 SGDID:S0003158, Chr VII from 147395-145815, reverse complement, Verified ORF	YGL190C	0.00128922	-100		YKL049C CSE4 SGDID:S0001532, Chr XI from 346409-345720, reverse complement, Verified ORF	YKL049C	7.20635e-06	-100
YKL005C BYE1 SGDID:S0001488, Chr XI from 434520-432736, reverse complement, Verified ORF	YKL005C	0.0012859	-100		YNL230C ELA1 SGDID:S0005174, Chr XIV from 218661-217522, reverse complement, Verified ORF	YNL230C	6.48479e-06	-100
YBR203W COS111 SGDID:S0000407, Chr II from 629163-631937, Verified ORF	YBR203W	0.00119476	-100		YHR165C PRP8 SGDID:S0001208, Chr VIII from 436949-429708, reverse complement, Verified ORF	YHR165C	4.94848e-06	-100
YPR069C SPE3 SGDID:S0006273, Chr XVI from 685434-684553, reverse complement, Verified ORF	YPR069C	0.00118841	-100		YLR024C UBR2 SGDID:S0004014, Chr XII from 193282-187664, reverse complement, Verified ORF	YLR024C	4.84876e-06	-100
YNL095C YNL095C SGDID:S0005039, Chr XIV from 446840-444912, reverse complement, Uncharacterized ORF	YNL095C	0.00113938	-100		YDR475C JIP4 SGDID:S0002883, Chr IV from 1410084-1407454, reverse complement, Uncharacterized ORF	YDR475C	4.77798e-06	-100
YOR341W RPA190 SGDID:S0005868, Chr XV from 960982-965976, Verified ORF	YOR341W	0.00108712	-100		YBR042C YBR042C SGDID:S0000246, Chr II from 321609-320416, reverse complement, Uncharacterized ORF	YBR042C	4.71796e-06	-100
YNL074C MLF3 SGDID:S0005018, Chr XIV from 488123-486765, reverse complement, Verified ORF	YNL074C	0.0010785	-100		YDR030C RAD28 SGDID:S0002437, Chr IV from 503269-501749, reverse complement, Verified ORF	YDR030C	2.82413e-06	-100
YDR473C PRP3 SGDID:S0002881, Chr IV from 1405844-1404435, reverse complement, Verified ORF	YDR473C	0.000993496	-100		YNL162W RPL42A SGDID:S0005106, Chr XIV from 331322-331325,331838-332154, Verified ORF	YNL162W	2.63947e-06	-100
YDR037W KRS1 SGDID:S0002444, Chr IV from 525436-527211, Verified ORF	YDR037W	0.000903998	-100		YMR086W YMR086W SGDID:S0004692, Chr XIII from 439207-442089, Uncharacterized ORF	YMR086W	2.61333e-06	-100
YDL171C GLT1 SGDID:S0002330, Chr IV from 155641-149204, reverse complement, Verified ORF	YDL171C	0.000781371	-100		YLR248W RCK2 SGDID:S0004238, Chr XII from 634254-636086, Verified ORF	YLR248W	2.17085e-06	-100
YMR229C RRP5 SGDID:S0004842, Chr XIII from 731122-725933, reverse complement, Verified ORF	YMR229C	0.000672301	-100		YPL054W LEE1 SGDID:S0005975, Chr XVI from 455756-456661, Verified ORF	YPL054W	2.1592e-06	-100
YNL069C RPL16B SGDID:S0005013, Chr XIV from 495000-494973,494523-493955, reverse complement, Verified ORF	YNL069C	0.000625872	-100		YNL191W YNL191W SGDID:S0005135, Chr XIV from 280431-281504, Uncharacterized ORF	YNL191W	2.0131e-06	-100
YDL195W SEC31 SGDID:S0002354, Chr IV from 107209-111030, Verified ORF	YDL195W	0.000608127	-100		YLR223C IFH1 SGDID:S0004213, Chr XII from 585492-582235, reverse complement, Verified ORF	YLR223C	1.98099e-06	-100
YNL293W MSB3 SGDID:S0005237, Chr XIV from 80638-82539, Verified ORF	YNL293W	0.000587582	-100		YER171W RAD3 SGDID:S0000973, Chr V from 527077-529413, Verified ORF	YER171W	1.83745e-06	-100
YMR190C SGS1 SGDID:S0004802, Chr XIII from 645257-640914, reverse complement, Verified ORF	YMR190C	0.000577541	-100		YDR492W IZH1 SGDID:S0002900, Chr IV from 1434914-1435864, Verified ORF	YDR492W	1.80431e-06	-100
YDR466W PKH3 SGDID:S0002874, Chr IV from 1395111-1397807, Verified ORF	YDR466W	0.000549882	-100		YAR014C BUD14 SGDID:S0000069, Chr I from 168866-166743, reverse complement, Verified ORF	YAR014C	1.74109e-06	-100
YPR024W YME1 SGDID:S0006228, Chr XVI from 610478-612721, Verified ORF	YPR024W	0.000519439	-100		YDR089W YDR089W SGDID:S0002496, Chr IV from 622107-624716, Uncharacterized ORF	YDR089W	1.71359e-06	-100
YDL153C SAS10 SGDID:S0002312, Chr IV from 183019-181187, reverse complement, Verified ORF	YDL153C	0.000465679	-100		YLR371W ROM2 SGDID:S0004363, Chr XII from 862713-866783, Verified ORF	YLR371W	1.592e-06	-100
YGL031C RPL24A SGDID:S0002999, Chr VII from 437939-437472, reverse complement, Verified ORF	YGL031C	0.000447195	-100		YIL125W KGD1 SGDID:S0001387, Chr IX from 122689-125733, Verified ORF	YIL125W	1.39746e-06	-100
YML081W YML081W SGDID:S0004546, Chr XIII from 104777-108532, Uncharacterized ORF	YML081W	0.00044664	-100		YLR185W RPL37A SGDID:S0004175, Chr XII from 522665-522671,523031-523290, Verified ORF	YLR185W	1.26136e-06	-100
YEL047C YEL047C SGDID:S0000773, Chr V from 66797-65385, reverse complement, Uncharacterized ORF	YEL047C	0.000432039	-100		YML059C YML059C SGDID:S0004524, Chr XIII from 158258-153219, reverse complement, Verified ORF	YML059C	1.23005e-06	-100
YKL165C MCD4 SGDID:S0001648, Chr XI from 140696-137937, reverse complement, Verified ORF	YKL165C	0.000415699	-100		YDL022W GPD1 SGDID:S0002180, Chr IV from 411822-412997, Verified ORF	YDL022W	1.18058e-06	-100
YLR087C CSF1 SGDID:S0004077, Chr XII from 315732-306856, reverse complement, Verified ORF	YLR087C	0.000385652	-100		YHR141C RPL42B SGDID:S0001183, Chr VIII from 382753-382750,382308-381992, reverse complement, Verified ORF	YHR141C	1.10186e-06	-100
YLR206W ENT2 SGDID:S0004196, Chr XII from 554580-556421, Verified ORF	YLR206W	0.000346341	-100		YJR138W IML1 SGDID:S0003899, Chr X from 684482-689236, Verified ORF	YJR138W	1.00232e-06	-100
YOR326W MYO2 SGDID:S0005853, Chr XV from 925716-930440, Verified ORF	YOR326W	0.000336498	-100		YKR019C IRS4 SGDID:S0001727, Chr XI from 477706-475859, reverse complement, Verified ORF	YKR019C	9.53818e-07	-100
YMR300C ADE4 SGDID:S0004915, Chr XIII from 867090-865558, reverse complement, Verified ORF	YMR300C	0.000308303	-100		YMR106C YKU80 SGDID:S0004712, Chr XIII from 480189-478300, reverse complement, Verified ORF	YMR106C	9.17285e-07	-100
YLR439W MRPL4 SGDID:S0004431, Chr XII from 1014487-1015446, Verified ORF	YLR439W	0.000293582	-100		YOL059W GPD2 SGDID:S0005420, Chr XV from 217125-218447, Verified ORF	YOL059W	8.72853e-07	-100
YPL215W CBP3 SGDID:S0006136, Chr XVI from 147415-148422, Verified ORF	YPL215W	0.000236743	-100		YGR283C YGR283C SGDID:S0003515, Chr VII from 1060046-1059021, reverse complement, Uncharacterized ORF	YGR283C	8.69689e-07	-100
YBR047W FMP23 SGDID:S0000251, Chr II from 331831-332358, Uncharacterized ORF	YBR047W	0.00023312	-100		YDR332W YDR332W SGDID:S0002740, Chr IV from 1130994-1133063, Uncharacterized ORF	YDR332W	8.24177e-07	-100
YJL080C SCP160 SGDID:S0003616, Chr X from 289142-285474, reverse complement, Verified ORF	YJL080C	0.000224117	-100		YER165W PAB1 SGDID:S0000967, Chr V from 510368-512101, Verified ORF	YER165W	7.4932e-07	-100
YHR137W ARO9 SGDID:S0001179, Chr VIII from 375711-377252, Verified ORF	YHR137W	0.000211412	-100		YDR104C SPO71 SGDID:S0002511, Chr IV from 664905-661168, reverse complement, Verified ORF	YDR104C	7.21986e-07	-100
YIL133C RPL16A SGDID:S0001395, Chr IX from 99416-99386,99095-98527, reverse complement, Verified ORF	YIL133C	0.000201741	-100		YLR090W XDJ1 SGDID:S0004080, Chr XII from 320702-322081, Verified ORF	YLR090W	5.80337e-07	-100
YHR017W YSC83 SGDID:S0001059, Chr VIII from 138686-139843, Verified ORF	YHR017W	0.000197579	-100		YDR393W SHE9 SGDID:S0002801, Chr IV from 1259891-1261261, Verified ORF	YDR393W	5.70703e-07	-100
YML007W YAP1 SGDID:S0004466, Chr XIII from 253848-255800, Verified ORF	YML007W	0.000176064	-100		YPR104C FHL1 SGDID:S0006308, Chr XVI from 736431-733621, reverse complement, Verified ORF	YPR104C	5.2931e-07	-100
YGL113W SLD3 SGDID:S0003081, Chr VII from 295935-297941, Verified ORF	YGL113W	0.000152996	-100		YMR172W HOT1 SGDID:S0004783, Chr XIII from 605980-608139, Verified ORF	YMR172W	4.72229e-07	-100
YNR019W ARE2 SGDID:S0005302, Chr XIV from 665339-667267, Verified ORF	YNR019W	0.000148881	-100		YEL063C CAN1 SGDID:S0000789, Chr V from 33466-31694, reverse complement, Verified ORF	YEL063C	4.51704e-07	-100
YPR084W YPR084W SGDID:S0006288, Chr XVI from 706970-708340, Uncharacterized ORF	YPR084W	0.000143279	-100		YMR247C YMR247C SGDID:S0004861, Chr XIII from 768038-763350, reverse complement, Uncharacterized ORF	YMR247C	4.20138e-07	-100
YCR019W MAK32 SGDID:S0000612, Chr III from 152834-153925, Verified ORF	YCR019W	0.000137058	-100		YPR032W SRO7 SGDID:S0006236, Chr XVI from 634120-637221, Verified ORF	YPR032W	4.11503e-07	-100
YNL132W KRE33 SGDID:S0005076, Chr XIV from 375321-378491, Verified ORF	YNL132W	0.000132196	-100		YPR085C YPR085C SGDID:S0006289, Chr XVI from 709826-708495, reverse complement, Uncharacterized ORF	YPR085C	4.02886e-07	-100
YDR348C YDR348C SGDID:S0002756, Chr IV from 1171817-1170318, reverse complement, Uncharacterized ORF	YDR348C	0.000128683	-100		YDL007W RPT2 SGDID:S0002165, Chr IV from 438044-439357, Verified ORF	YDL007W	3.91235e-07	-100
YOR290C SNF2 SGDID:S0005816, Chr XV from 860255-855144, reverse complement, Verified ORF	YOR290C	0.000114041	-100		YBR259W YBR259W SGDID:S0000463, Chr II from 730382-732448, Uncharacterized ORF	YBR259W	3.27806e-07	-100
YIL107C PFK26 SGDID:S0001369, Chr IX from 165758-163275, reverse complement, Verified ORF	YIL107C	0.000114019	-100		YGR274C TAF1 SGDID:S0003506, Chr VII from 1043101-1039901, reverse complement, Verified ORF	YGR274C	3.17417e-07	-100
YGL131C SNT2 SGDID:S0003099, Chr VII from 265864-261653, reverse complement, Verified ORF	YGL131C	0.000106086	-100		YDR158W HOM2 SGDID:S0002565, Chr IV from 770352-771449, Verified ORF	YDR158W	2.59318e-07	-100
YGL245W GUS1 SGDID:S0003214, Chr VII from 39023-41149, Verified ORF	YGL245W	0.0001036	-100		YPL095C YPL095C SGDID:S0006016, Chr XVI from 369438-368068, reverse complement, Uncharacterized ORF	YPL095C	2.49356e-07	-100
YNL021W HDA1 SGDID:S0004966, Chr XIV from 593226-595346, Verified ORF	YNL021W	0.000103506	-100		YDR294C DPL1 SGDID:S0002702, Chr IV from 1052222-1050453, reverse complement, Verified ORF	YDR294C	2.4717e-07	-100
YIL046W MET30 SGDID:S0001308, Chr IX from 268650-270572, Verified ORF	YIL046W	9.16562e-05	-100		YAL021C CCR4 SGDID:S0000019, Chr I from 113360-110847, reverse complement, Verified ORF	YAL021C	2.41063e-07	-100
YNR018W YNR018W SGDID:S0005301, Chr XIV from 664270-664944, Uncharacterized ORF	YNR018W	8.26356e-05	-100		YKR017C YKR017C SGDID:S0001725, Chr XI from 472992-471337, reverse complement, Uncharacterized ORF	YKR017C	2.3537e-07	-100
YCR048W ARE1 SGDID:S0000644, Chr III from 211924-213756, Verified ORF	YCR048W	7.99597e-05	-100		YBR009C HHF1 SGDID:S0000213, Chr II from 255682-255371, reverse complement, Verified ORF	YBR009C	2.29088e-07	-100
YDR363W ESC2 SGDID:S0002771, Chr IV from 1199173-1200543, Verified ORF	YDR363W	7.45558e-05	-100		YHR083W SAM35 SGDID:S0001125, Chr VIII from 272628-273617, Verified ORF	YHR083W	1.68295e-07	-100
YDR440W DOT1 SGDID:S0002848, Chr IV from 1342483-1344231, Verified ORF	YDR440W	7.34705e-05	-100		YDR185C YDR185C SGDID:S0002593, Chr IV from 832468-831929, reverse complement, Uncharacterized ORF	YDR185C	1.43922e-07	-100
YDL205C HEM3 SGDID:S0002364, Chr IV from 93746-92763, reverse complement, Verified ORF	YDL205C	7.18834e-05	-100		YBL007C SLA1 SGDID:S0000103, Chr II from 216369-212635, reverse complement, Verified ORF	YBL007C	1.35549e-07	-100
YDR500C RPL37B SGDID:S0002908, Chr IV from 1450843-1450837,1450447-1450188, reverse complement, Verified ORF	YDR500C	6.80334e-05	-100		YNL030W HHF2 SGDID:S0004975, Chr XIV from 576726-577037, Verified ORF	YNL030W	1.21856e-07	-100
YIR035C YIR035C SGDID:S0001474, Chr IX from 421787-421023, reverse complement, Uncharacterized ORF	YIR035C	5.54793e-05	-100		YGR146C YGR146C SGDID:S0003378, Chr VII from 784863-784228, reverse complement, Uncharacterized ORF	YGR146C	1.1735e-07	-100
YLR401C DUS3 SGDID:S0004393, Chr XII from 924447-922618, reverse complement, Uncharacterized ORF	YLR401C	5.51638e-05	-100		YMR196W YMR196W SGDID:S0004809, Chr XIII from 655075-658341, Uncharacterized ORF	YMR196W	1.03888e-07	-100
YLR209C PNP1 SGDID:S0004199, Chr XII from 561734-560799, reverse complement, Verified ORF	YLR209C	4.68625e-05	-100		YOL065C INP54 SGDID:S0005426, Chr XV from 205884-204730, reverse complement, Verified ORF	YOL065C	1.00396e-07	-100
YAR042W SWH1 SGDID:S0000081, Chr I from 192613-196179, Verified ORF	YAR042W	3.83562e-05	-100		YER164W CHD1 SGDID:S0000966, Chr V from 505387-509793, Verified ORF	YER164W	8.68231e-08	-100
YOR117W RPT5 SGDID:S0005643, Chr XV from 545029-546333, Verified ORF	YOR117W	3.64918e-05	-100		YGR200C ELP2 SGDID:S0003432, Chr VII from 902275-899909, reverse complement, Verified ORF	YGR200C	7.85787e-08	-100
YFR027W ECO1 SGDID:S0001923, Chr VI from 207440-208285, Verified ORF	YFR027W	2.88393e-05	-100		YLR208W SEC13 SGDID:S0004198, Chr XII from 559553-560446, Verified ORF	YLR208W	7.22498e-08	-100
YDR103W STE5 SGDID:S0002510, Chr IV from 658345-661098, Verified ORF	YDR103W	2.78334e-05	-100		YEL032W MCM3 SGDID:S0000758, Chr V from 86937-89852, Verified ORF	YEL032W	7.08131e-08	-100
YPL262W FUM1 SGDID:S0006183, Chr XVI from 47336-48802, Verified ORF	YPL262W	2.6217e-05	-100		YDL214C PRR2 SGDID:S0002373, Chr IV from 76546-74447, reverse complement, Verified ORF	YDL214C	6.77377e-08	-100
YEL044W IES6 SGDID:S0000770, Chr V from 69757-70257, Verified ORF	YEL044W	2.21742e-05	-100		YBR049C REB1 SGDID:S0000253, Chr II from 336816-334384, reverse complement, Verified ORF	YBR049C	6.70193e-08	-100
YKR098C UBP11 SGDID:S0001806, Chr XI from 634817-632664, reverse complement, Verified ORF	YKR098C	2.18471e-05	-100		YOL087C YOL087C SGDID:S0005447, Chr XV from 158636-155286, reverse complement, Uncharacterized ORF	YOL087C	6.19639e-08	-100
YOL017W ESC8 SGDID:S0005377, Chr XV from 292529-294673, Verified ORF	YOL017W	1.9361e-05	-100		YCL004W PGS1 SGDID:S0000510, Chr III from 109104-110669, Verified ORF	YCL004W	6.10835e-08	-100
YEL022W GEA2 SGDID:S0000748, Chr V from 111421-115800, Verified ORF	YEL022W	1.69753e-05	-100		YBR240C THI2 SGDID:S0000444, Chr II from 701837-700485, reverse complement, Verified ORF	YBR240C	5.65953e-08	-100
YOR353C SOG2 SGDID:S0005880, Chr XV from 1000823-998448, reverse complement, Uncharacterized ORF	YOR353C	1.63654e-05	-100		YDR516C EMI2 SGDID:S0002924, Chr IV from 1476466-1474964, reverse complement, Verified ORF	YDR516C	4.03628e-08	-100
YOR289W YOR289W SGDID:S0005815, Chr XV from 853354-854109, Uncharacterized ORF	YOR289W	1.32153e-05	-100		YHL030W ECM29 SGDID:S0001022, Chr VIII from 40082-45688, Verified ORF	YHL030W	3.98511e-08	-100
YDL045C FAD1 SGDID:S0002203, Chr IV from 373605-372685, reverse complement, Verified ORF	YDL045C	1.24996e-05	-100		YNL207W RIO2 SGDID:S0005151, Chr XIV from 255352-256629, Verified ORF	YNL207W	3.97344e-08	-100
YGR092W DBF2 SGDID:S0003324, Chr VII from 668193-669911, Verified ORF	YGR092W	1.07526e-05	-100		YNL144C YNL144C SGDID:S0005088, Chr XIV from 355042-352820, reverse complement, Uncharacterized ORF	YNL144C	3.64355e-08	-100
YER093C TSC11 SGDID:S0000895, Chr V from 347608-343316, reverse complement, Verified ORF	YER093C	1.02737e-05	-100		YBL088C TEL1 SGDID:S0000184, Chr II from 59379-51016, reverse complement, Verified ORF	YBL088C	3.54627e-08	-100
YGR241C YAP1802 SGDID:S0003473, Chr VII from 976586-974880, reverse complement, Verified ORF	YGR241C	1.02698e-05	-100		YOR168W GLN4 SGDID:S0005694, Chr XV from 649303-651732, Verified ORF	YOR168W	3.03736e-08	-100
YBR236C ABD1 SGDID:S0000440, Chr II from 691688-690378, reverse complement, Verified ORF	YBR236C	1.00527e-05	-100		YML118W NGL3 SGDID:S0004587, Chr XIII from 32334-33851, Verified ORF	YML118W	2.26944e-08	-100
YHR085W IPI1 SGDID:S0001127, Chr VIII from 276765-277769, Verified ORF	YHR085W	9.91644e-06	-100		YMR029C FAR8 SGDID:S0004631, Chr XIII from 330230-328659, reverse complement, Verified ORF	YMR029C	2.2561e-08	-100
YOR365C YOR365C SGDID:S0005892, Chr XV from 1025568-1023457, reverse complement, Uncharacterized ORF	YOR365C	8.76056e-06	-100		YHR155W YHR155W SGDID:S0001198, Chr VIII from 407105-410791, Uncharacterized ORF	YHR155W	2.23844e-08	-100
YGR275W RTT102 SGDID:S0003507, Chr VII from 1043282-1043755, Verified ORF	YGR275W	8.42305e-06	-100		YGR266W YGR266W SGDID:S0003498, Chr VII from 1022662-1024767, Uncharacterized ORF	YGR266W	2.11535e-08	-100
YMR034C YMR034C SGDID:S0004637, Chr XIII from 340721-339417, reverse complement, Uncharacterized ORF	YMR034C	7.94163e-06	-100		YOR352W YOR352W SGDID:S0005879, Chr XV from 997208-998239, Uncharacterized ORF	YOR352W	2.09062e-08	-100
YBR195C MSI1 SGDID:S0000399, Chr II from 611877-610609, reverse complement, Verified ORF	YBR195C	7.29876e-06	-100		YDR212W TCP1 SGDID:S0002620, Chr IV from 887227-888906, Verified ORF	YDR212W	1.63979e-08	-100
YJL084C YJL084C SGDID:S0003620, Chr X from 277918-274778, reverse complement, Verified ORF	YJL084C	7.28666e-06	-100		YBR083W TEC1 SGDID:S0000287, Chr II from 409163-410623, Verified ORF	YBR083W	1.44549e-08	-100
YKL049C CSE4 SGDID:S0001532, Chr XI from 346409-345720, reverse complement, Verified ORF	YKL049C	7.20635e-06	-100		YAL061W YAL061W SGDID:S0000057, Chr I from 33449-34702, Uncharacterized ORF	YAL061W	1.42553e-08	-100
YNL230C ELA1 SGDID:S0005174, Chr XIV from 218661-217522, reverse complement, Verified ORF	YNL230C	6.48479e-06	-100		YOR144C ELG1 SGDID:S0005670, Chr XV from 605092-602717, reverse complement, Verified ORF	YOR144C	1.31113e-08	-100
YHR165C PRP8 SGDID:S0001208, Chr VIII from 436949-429708, reverse complement, Verified ORF	YHR165C	4.94848e-06	-100		YGL197W MDS3 SGDID:S0003165, Chr VII from 124703-129166, Verified ORF	YGL197W	1.18061e-08	-100
YLR024C UBR2 SGDID:S0004014, Chr XII from 193282-187664, reverse complement, Verified ORF	YLR024C	4.84876e-06	-100		YEL015W EDC3 SGDID:S0000741, Chr V from 126629-128284, Verified ORF	YEL015W	1.07478e-08	-100
YDR475C JIP4 SGDID:S0002883, Chr IV from 1410084-1407454, reverse complement, Uncharacterized ORF	YDR475C	4.77798e-06	-100		YJL047C RTT101 SGDID:S0003583, Chr X from 352024-349496, reverse complement, Verified ORF	YJL047C	6.51739e-09	-100
YBR042C YBR042C SGDID:S0000246, Chr II from 321609-320416, reverse complement, Uncharacterized ORF	YBR042C	4.71796e-06	-100		YDR207C UME6 SGDID:S0002615, Chr IV from 867517-865007, reverse complement, Verified ORF	YDR207C	6.09556e-09	-100
YDR030C RAD28 SGDID:S0002437, Chr IV from 503269-501749, reverse complement, Verified ORF	YDR030C	2.82413e-06	-100		YLR091W YLR091W SGDID:S0004081, Chr XII from 322298-323179, Uncharacterized ORF	YLR091W	5.69077e-09	-100
YNL162W RPL42A SGDID:S0005106, Chr XIV from 331322-331325,331838-332154, Verified ORF	YNL162W	2.63947e-06	-100		YFR048W RMD8 SGDID:S0001944, Chr VI from 246133-248121, Verified ORF	YFR048W	5.6148e-09	-100
YMR086W YMR086W SGDID:S0004692, Chr XIII from 439207-442089, Uncharacterized ORF	YMR086W	2.61333e-06	-100		YDR222W YDR222W SGDID:S0002630, Chr IV from 910048-911295, Uncharacterized ORF	YDR222W	5.22531e-09	-100
YLR248W RCK2 SGDID:S0004238, Chr XII from 634254-636086, Verified ORF	YLR248W	2.17085e-06	-100		YNR047W YNR047W SGDID:S0005330, Chr XIV from 708523-711204, Uncharacterized ORF	YNR047W	3.93228e-09	-100
YPL054W LEE1 SGDID:S0005975, Chr XVI from 455756-456661, Verified ORF	YPL054W	2.1592e-06	-100		YER102W RPS8B SGDID:S0000904, Chr V from 363096-363698, Verified ORF	YER102W	3.90483e-09	-100
YNL191W YNL191W SGDID:S0005135, Chr XIV from 280431-281504, Uncharacterized ORF	YNL191W	2.0131e-06	-100		YPR119W CLB2 SGDID:S0006323, Chr XVI from 771651-773126, Verified ORF	YPR119W	3.75928e-09	-100
YLR223C IFH1 SGDID:S0004213, Chr XII from 585492-582235, reverse complement, Verified ORF	YLR223C	1.98099e-06	-100		YIL143C SSL2 SGDID:S0001405, Chr IX from 83041-80510, reverse complement, Verified ORF	YIL143C	3.31186e-09	-100
YER171W RAD3 SGDID:S0000973, Chr V from 527077-529413, Verified ORF	YER171W	1.83745e-06	-100		YKL145W RPT1 SGDID:S0001628, Chr XI from 174218-175621, Verified ORF	YKL145W	1.87858e-09	-100
YDR492W IZH1 SGDID:S0002900, Chr IV from 1434914-1435864, Verified ORF	YDR492W	1.80431e-06	-100		YJL101C GSH1 SGDID:S0003637, Chr X from 236273-234237, reverse complement, Verified ORF	YJL101C	1.56912e-09	-100
YAR014C BUD14 SGDID:S0000069, Chr I from 168866-166743, reverse complement, Verified ORF	YAR014C	1.74109e-06	-100		YNL054W VAC7 SGDID:S0004999, Chr XIV from 526085-529582, Verified ORF	YNL054W	1.56399e-09	-100
YDR089W YDR089W SGDID:S0002496, Chr IV from 622107-624716, Uncharacterized ORF	YDR089W	1.71359e-06	-100		YOR324C FRT1 SGDID:S0005851, Chr XV from 925035-923227, reverse complement, Verified ORF	YOR324C	1.55717e-09	-100
YLR371W ROM2 SGDID:S0004363, Chr XII from 862713-866783, Verified ORF	YLR371W	1.592e-06	-100		YKL098W YKL098W SGDID:S0001581, Chr XI from 256415-257488, Uncharacterized ORF	YKL098W	1.55377e-09	-100
YIL125W KGD1 SGDID:S0001387, Chr IX from 122689-125733, Verified ORF	YIL125W	1.39746e-06	-100		YIL055C YIL055C SGDID:S0001317, Chr IX from 253923-252040, reverse complement, Uncharacterized ORF	YIL055C	1.4727e-09	-100
YLR185W RPL37A SGDID:S0004175, Chr XII from 522665-522671,523031-523290, Verified ORF	YLR185W	1.26136e-06	-100		YIL090W YIL090W SGDID:S0001352, Chr IX from 193592-195067, Uncharacterized ORF	YIL090W	1.46789e-09	-100
YML059C YML059C SGDID:S0004524, Chr XIII from 158258-153219, reverse complement, Verified ORF	YML059C	1.23005e-06	-100		YER147C SCC4 SGDID:S0000949, Chr V from 464837-462963, reverse complement, Verified ORF	YER147C	1.46789e-09	-100
YDL022W GPD1 SGDID:S0002180, Chr IV from 411822-412997, Verified ORF	YDL022W	1.18058e-06	-100		YAL031C FUN21 SGDID:S0000029, Chr I from 87032-84750, reverse complement, Verified ORF	YAL031C	1.46789e-09	-100
YHR141C RPL42B SGDID:S0001183, Chr VIII from 382753-382750,382308-381992, reverse complement, Verified ORF	YHR141C	1.10186e-06	-100		YPL146C YPL146C SGDID:S0006067, Chr XVI from 277528-276161, reverse complement, Uncharacterized ORF	YPL146C	1.46309e-09	-100
YJR138W IML1 SGDID:S0003899, Chr X from 684482-689236, Verified ORF	YJR138W	1.00232e-06	-100		YGL020C MDM39 SGDID:S0002988, Chr VII from 457875-457168, reverse complement, Verified ORF	YGL020C	1.4055e-09	-100
YKR019C IRS4 SGDID:S0001727, Chr XI from 477706-475859, reverse complement, Verified ORF	YKR019C	9.53818e-07	-100		YKR077W YKR077W SGDID:S0001785, Chr XI from 583295-584386, Uncharacterized ORF	YKR077W	1.39321e-09	-100
YMR106C YKU80 SGDID:S0004712, Chr XIII from 480189-478300, reverse complement, Verified ORF	YMR106C	9.17285e-07	-100		YPR008W HAA1 SGDID:S0006212, Chr XVI from 573015-575099, Verified ORF	YPR008W	1.29077e-09	-100
YOL059W GPD2 SGDID:S0005420, Chr XV from 217125-218447, Verified ORF	YOL059W	8.72853e-07	-100		YOL044W PEX15 SGDID:S0005404, Chr XV from 247148-248299, Verified ORF	YOL044W	1.18497e-09	-100
YGR283C YGR283C SGDID:S0003515, Chr VII from 1060046-1059021, reverse complement, Uncharacterized ORF	YGR283C	8.69689e-07	-100		YJR033C RAV1 SGDID:S0003794, Chr X from 496365-492292, reverse complement, Verified ORF	YJR033C	1.18308e-09	-100
YDR332W YDR332W SGDID:S0002740, Chr IV from 1130994-1133063, Uncharacterized ORF	YDR332W	8.24177e-07	-100		YPR030W CSR2 SGDID:S0006234, Chr XVI from 627877-631242, Verified ORF	YPR030W	1.17535e-09	-100
YER165W PAB1 SGDID:S0000967, Chr V from 510368-512101, Verified ORF	YER165W	7.4932e-07	-100		YDL230W PTP1 SGDID:S0002389, Chr IV from 42701-43708, Verified ORF	YDL230W	1.138e-09	-100
YDR104C SPO71 SGDID:S0002511, Chr IV from 664905-661168, reverse complement, Verified ORF	YDR104C	7.21986e-07	-100		YCR091W KIN82 SGDID:S0000687, Chr III from 274400-276562, Verified ORF	YCR091W	1.13655e-09	-100
YLR090W XDJ1 SGDID:S0004080, Chr XII from 320702-322081, Verified ORF	YLR090W	5.80337e-07	-100		YBL072C RPS8A SGDID:S0000168, Chr II from 89123-88521, reverse complement, Verified ORF	YBL072C	1.11406e-09	-100
YDR393W SHE9 SGDID:S0002801, Chr IV from 1259891-1261261, Verified ORF	YDR393W	5.70703e-07	-100		YOR175C YOR175C SGDID:S0005701, Chr XV from 661674-659815, reverse complement, Uncharacterized ORF	YOR175C	3.52403e-10	-100
YPR104C FHL1 SGDID:S0006308, Chr XVI from 736431-733621, reverse complement, Verified ORF	YPR104C	5.2931e-07	-100		YFL008W SMC1 SGDID:S0001886, Chr VI from 119424-123101, Verified ORF	YFL008W	3.51815e-10	-100
YMR172W HOT1 SGDID:S0004783, Chr XIII from 605980-608139, Verified ORF	YMR172W	4.72229e-07	-100		YMR031C YMR031C SGDID:S0004633, Chr XIII from 334742-332211, reverse complement, Uncharacterized ORF	YMR031C	3.51228e-10	-100
YEL063C CAN1 SGDID:S0000789, Chr V from 33466-31694, reverse complement, Verified ORF	YEL063C	4.51704e-07	-100		YDR057W YOS9 SGDID:S0002464, Chr IV from 565924-567552, Verified ORF	YDR057W	3.27024e-10	-100
YMR247C YMR247C SGDID:S0004861, Chr XIII from 768038-763350, reverse complement, Uncharacterized ORF	YMR247C	4.20138e-07	-100		YNL233W BNI4 SGDID:S0005177, Chr XIV from 211921-214599, Verified ORF	YNL233W	3.20548e-10	-100
YPR032W SRO7 SGDID:S0006236, Chr XVI from 634120-637221, Verified ORF	YPR032W	4.11503e-07	-100		YOR163W DDP1 SGDID:S0005689, Chr XV from 642741-643307, Verified ORF	YOR163W	2.99357e-10	-100
YPR085C YPR085C SGDID:S0006289, Chr XVI from 709826-708495, reverse complement, Uncharacterized ORF	YPR085C	4.02886e-07	-100		YGR179C OKP1 SGDID:S0003411, Chr VII from 854900-853680, reverse complement, Verified ORF	YGR179C	2.89742e-10	-100
YDL007W RPT2 SGDID:S0002165, Chr IV from 438044-439357, Verified ORF	YDL007W	3.91235e-07	-100		YHR194W MDM31 SGDID:S0001237, Chr VIII from 488656-490395, Verified ORF	YHR194W	2.75441e-10	-100
YBR259W YBR259W SGDID:S0000463, Chr II from 730382-732448, Uncharacterized ORF	YBR259W	3.27806e-07	-100		YKL171W YKL171W SGDID:S0001654, Chr XI from 127480-130266, Uncharacterized ORF	YKL171W	2.74404e-10	-100
YGR274C TAF1 SGDID:S0003506, Chr VII from 1043101-1039901, reverse complement, Verified ORF	YGR274C	3.17417e-07	-100		YPL232W SSO1 SGDID:S0006153, Chr XVI from 107275-108147, Verified ORF	YPL232W	2.61002e-10	-100
YDR158W HOM2 SGDID:S0002565, Chr IV from 770352-771449, Verified ORF	YDR158W	2.59318e-07	-100		YGL194C HOS2 SGDID:S0003162, Chr VII from 141732-140374, reverse complement, Verified ORF	YGL194C	2.31261e-10	-100
YPL095C YPL095C SGDID:S0006016, Chr XVI from 369438-368068, reverse complement, Uncharacterized ORF	YPL095C	2.49356e-07	-100		YKL205W LOS1 SGDID:S0001688, Chr XI from 50052-53354, Verified ORF	YKL205W	7.12087e-11	-100
YDR294C DPL1 SGDID:S0002702, Chr IV from 1052222-1050453, reverse complement, Verified ORF	YDR294C	2.4717e-07	-100		YOR030W DFG16 SGDID:S0005556, Chr XV from 386824-388683, Verified ORF	YOR030W	7.11218e-11	-100
YAL021C CCR4 SGDID:S0000019, Chr I from 113360-110847, reverse complement, Verified ORF	YAL021C	2.41063e-07	-100		YBR265W TSC10 SGDID:S0000469, Chr II from 738577-739539, Verified ORF	YBR265W	6.64248e-11	-100
YKR017C YKR017C SGDID:S0001725, Chr XI from 472992-471337, reverse complement, Uncharacterized ORF	YKR017C	2.3537e-07	-100		YOR340C RPA43 SGDID:S0005867, Chr XV from 960177-959197, reverse complement, Verified ORF	YOR340C	4.47957e-11	-100
YBR009C HHF1 SGDID:S0000213, Chr II from 255682-255371, reverse complement, Verified ORF	YBR009C	2.29088e-07	-100		YDR182W CDC1 SGDID:S0002590, Chr IV from 827577-829052, Verified ORF	YDR182W	4.34688e-11	-100
YHR083W SAM35 SGDID:S0001125, Chr VIII from 272628-273617, Verified ORF	YHR083W	1.68295e-07	-100		YML097C VPS9 SGDID:S0004563, Chr XIII from 79690-78335, reverse complement, Verified ORF	YML097C	4.29441e-11	-100
YDR185C YDR185C SGDID:S0002593, Chr IV from 832468-831929, reverse complement, Uncharacterized ORF	YDR185C	1.43922e-07	-100		YOR090C PTC5 SGDID:S0005616, Chr XV from 492842-491124, reverse complement, Verified ORF	YOR090C	3.73259e-11	-100
YBL007C SLA1 SGDID:S0000103, Chr II from 216369-212635, reverse complement, Verified ORF	YBL007C	1.35549e-07	-100		YER122C GLO3 SGDID:S0000924, Chr V from 404348-402867, reverse complement, Verified ORF	YER122C	3.73082e-11	-100
YNL030W HHF2 SGDID:S0004975, Chr XIV from 576726-577037, Verified ORF	YNL030W	1.21856e-07	-100		YMR214W SCJ1 SGDID:S0004827, Chr XIII from 695349-696482, Verified ORF	YMR214W	3.72901e-11	-100
YGR146C YGR146C SGDID:S0003378, Chr VII from 784863-784228, reverse complement, Uncharacterized ORF	YGR146C	1.1735e-07	-100		YHR175W CTR2 SGDID:S0001218, Chr VIII from 452871-453440, Verified ORF	YHR175W	3.58212e-11	-100
YMR196W YMR196W SGDID:S0004809, Chr XIII from 655075-658341, Uncharacterized ORF	YMR196W	1.03888e-07	-100		YER144C UBP5 SGDID:S0000946, Chr V from 460218-457801, reverse complement, Verified ORF	YER144C	3.57524e-11	-100
YOL065C INP54 SGDID:S0005426, Chr XV from 205884-204730, reverse complement, Verified ORF	YOL065C	1.00396e-07	-100		YDR184C ATC1 SGDID:S0002592, Chr IV from 831508-830624, reverse complement, Verified ORF	YDR184C	3.57009e-11	-100
YER164W CHD1 SGDID:S0000966, Chr V from 505387-509793, Verified ORF	YER164W	8.68231e-08	-100		YMR224C MRE11 SGDID:S0004837, Chr XIII from 720652-718574, reverse complement, Verified ORF	YMR224C	3.15086e-11	-100
YGR200C ELP2 SGDID:S0003432, Chr VII from 902275-899909, reverse complement, Verified ORF	YGR200C	7.85787e-08	-100		YDR326C YDR326C SGDID:S0002734, Chr IV from 1124918-1120602, reverse complement, Uncharacterized ORF	YDR326C	1.08875e-11	-100
YLR208W SEC13 SGDID:S0004198, Chr XII from 559553-560446, Verified ORF	YLR208W	7.22498e-08	-100		YPR178W PRP4 SGDID:S0006382, Chr XVI from 892328-893725, Verified ORF	YPR178W	1.08415e-11	-100
YEL032W MCM3 SGDID:S0000758, Chr V from 86937-89852, Verified ORF	YEL032W	7.08131e-08	-100		YLR045C STU2 SGDID:S0004035, Chr XII from 237704-235038, reverse complement, Verified ORF	YLR045C	1.08415e-11	-100
YDL214C PRR2 SGDID:S0002373, Chr IV from 76546-74447, reverse complement, Verified ORF	YDL214C	6.77377e-08	-100		YOL034W SMC5 SGDID:S0005394, Chr XV from 259923-263204, Verified ORF	YOL034W	1.08236e-11	-100
YBR049C REB1 SGDID:S0000253, Chr II from 336816-334384, reverse complement, Verified ORF	YBR049C	6.70193e-08	-100		YLR386W VAC14 SGDID:S0004378, Chr XII from 893628-896270, Verified ORF	YLR386W	1.02209e-11	-100
YOL087C YOL087C SGDID:S0005447, Chr XV from 158636-155286, reverse complement, Uncharacterized ORF	YOL087C	6.19639e-08	-100		YAL040C CLN3 SGDID:S0000038, Chr I from 67521-65779, reverse complement, Verified ORF	YAL040C	1.01523e-11	-100
YCL004W PGS1 SGDID:S0000510, Chr III from 109104-110669, Verified ORF	YCL004W	6.10835e-08	-100		YPR048W TAH18 SGDID:S0006252, Chr XVI from 659179-661050, Verified ORF	YPR048W	4.17555e-12	-100
YBR240C THI2 SGDID:S0000444, Chr II from 701837-700485, reverse complement, Verified ORF	YBR240C	5.65953e-08	-100		YKL110C KTI12 SGDID:S0001593, Chr XI from 229526-228585, reverse complement, Verified ORF	YKL110C	2.68452e-12	-100
YDR516C EMI2 SGDID:S0002924, Chr IV from 1476466-1474964, reverse complement, Verified ORF	YDR516C	4.03628e-08	-100		YLR233C EST1 SGDID:S0004223, Chr XII from 609526-607427, reverse complement, Verified ORF	YLR233C	2.68441e-12	-100
YHL030W ECM29 SGDID:S0001022, Chr VIII from 40082-45688, Verified ORF	YHL030W	3.98511e-08	-100		YPR007C REC8 SGDID:S0006211, Chr XVI from 571375-569333, reverse complement, Verified ORF	YPR007C	2.59825e-12	-100
YNL207W RIO2 SGDID:S0005151, Chr XIV from 255352-256629, Verified ORF	YNL207W	3.97344e-08	-100		YMR129W POM152 SGDID:S0004736, Chr XIII from 527803-531816, Verified ORF	YMR129W	2.59481e-12	-100
YNL144C YNL144C SGDID:S0005088, Chr XIV from 355042-352820, reverse complement, Uncharacterized ORF	YNL144C	3.64355e-08	-100		YLR115W CFT2 SGDID:S0004105, Chr XII from 377986-380565, Verified ORF	YLR115W	2.51332e-12	-100
YBL088C TEL1 SGDID:S0000184, Chr II from 59379-51016, reverse complement, Verified ORF	YBL088C	3.54627e-08	-100		YOR288C MPD1 SGDID:S0005814, Chr XV from 853074-852118, reverse complement, Verified ORF	YOR288C	2.43627e-12	-100
YOR168W GLN4 SGDID:S0005694, Chr XV from 649303-651732, Verified ORF	YOR168W	3.03736e-08	-100		YGR055W MUP1 SGDID:S0003287, Chr VII from 599421-601145, Verified ORF	YGR055W	1.77136e-12	-100
YML118W NGL3 SGDID:S0004587, Chr XIII from 32334-33851, Verified ORF	YML118W	2.26944e-08	-100		YLR225C YLR225C SGDID:S0004215, Chr XII from 588920-587697, reverse complement, Uncharacterized ORF	YLR225C	1.72484e-12	-100
YMR029C FAR8 SGDID:S0004631, Chr XIII from 330230-328659, reverse complement, Verified ORF	YMR029C	2.2561e-08	-100		YDR346C SVF1 SGDID:S0002754, Chr IV from 1168651-1167206, reverse complement, Verified ORF	YDR346C	1.10456e-12	-100
YHR155W YHR155W SGDID:S0001198, Chr VIII from 407105-410791, Uncharacterized ORF	YHR155W	2.23844e-08	-100		YHR028C DAP2 SGDID:S0001070, Chr VIII from 167426-164970, reverse complement, Verified ORF	YHR028C	1.10456e-12	-100
YGR266W YGR266W SGDID:S0003498, Chr VII from 1022662-1024767, Uncharacterized ORF	YGR266W	2.11535e-08	-100		YLR219W MSC3 SGDID:S0004209, Chr XII from 574153-576339, Verified ORF	YLR219W	1.10401e-12	-100
YOR352W YOR352W SGDID:S0005879, Chr XV from 997208-998239, Uncharacterized ORF	YOR352W	2.09062e-08	-100		YBL086C YBL086C SGDID:S0000182, Chr II from 62599-61199, reverse complement, Uncharacterized ORF	YBL086C	1.1029e-12	-100
YDR212W TCP1 SGDID:S0002620, Chr IV from 887227-888906, Verified ORF	YDR212W	1.63979e-08	-100		YNL163C RIA1 SGDID:S0005107, Chr XIV from 330073-326741, reverse complement, Verified ORF	YNL163C	1.0546e-12	-100
YBR083W TEC1 SGDID:S0000287, Chr II from 409163-410623, Verified ORF	YBR083W	1.44549e-08	-100		YOR244W ESA1 SGDID:S0005770, Chr XV from 792531-793868, Verified ORF	YOR244W	9.2204e-13	-100
YAL061W YAL061W SGDID:S0000057, Chr I from 33449-34702, Uncharacterized ORF	YAL061W	1.42553e-08	-100		YBL106C SRO77 SGDID:S0000202, Chr II from 13879-10847, reverse complement, Verified ORF	YBL106C	4.54192e-13	-100
YOR144C ELG1 SGDID:S0005670, Chr XV from 605092-602717, reverse complement, Verified ORF	YOR144C	1.31113e-08	-100		YBR111C YSA1 SGDID:S0000315, Chr II from 461867-461172, reverse complement, Verified ORF	YBR111C	1.27454e-13	-100
YGL197W MDS3 SGDID:S0003165, Chr VII from 124703-129166, Verified ORF	YGL197W	1.18061e-08	-100		YDR457W TOM1 SGDID:S0002865, Chr IV from 1369780-1379586, Verified ORF	YDR457W	6.70575e-14	-100
YEL015W EDC3 SGDID:S0000741, Chr V from 126629-128284, Verified ORF	YEL015W	1.07478e-08	-100		YPR163C TIF3 SGDID:S0006367, Chr XVI from 869951-868641, reverse complement, Verified ORF	YPR163C	6.70575e-14	-100
YJL047C RTT101 SGDID:S0003583, Chr X from 352024-349496, reverse complement, Verified ORF	YJL047C	6.51739e-09	-100		YLR449W FPR4 SGDID:S0004441, Chr XII from 1030829-1032007, Verified ORF	YLR449W	6.69464e-14	-100
YDR207C UME6 SGDID:S0002615, Chr IV from 867517-865007, reverse complement, Verified ORF	YDR207C	6.09556e-09	-100		YKR043C YKR043C SGDID:S0001751, Chr XI from 521354-520539, reverse complement, Uncharacterized ORF	YKR043C	6.68354e-14	-100
YLR091W YLR091W SGDID:S0004081, Chr XII from 322298-323179, Uncharacterized ORF	YLR091W	5.69077e-09	-100		YKL212W SAC1 SGDID:S0001695, Chr XI from 34544-36415, Verified ORF	YKL212W	6.55032e-14	-100
YFR048W RMD8 SGDID:S0001944, Chr VI from 246133-248121, Verified ORF	YFR048W	5.6148e-09	-100		YHR115C DMA1 SGDID:S0001157, Chr VIII from 341361-340111, reverse complement, Uncharacterized ORF	YHR115C	6.53921e-14	-100
YDR222W YDR222W SGDID:S0002630, Chr IV from 910048-911295, Uncharacterized ORF	YDR222W	5.22531e-09	-100		YJR059W PTK2 SGDID:S0003820, Chr X from 545701-548157, Verified ORF	YJR059W	5.88418e-14	-100
YNR047W YNR047W SGDID:S0005330, Chr XIV from 708523-711204, Uncharacterized ORF	YNR047W	3.93228e-09	-100		YKL146W AVT3 SGDID:S0001629, Chr XI from 171788-173866, Verified ORF	YKL146W	5.88418e-14	-100
YER102W RPS8B SGDID:S0000904, Chr V from 363096-363698, Verified ORF	YER102W	3.90483e-09	-100		YLR168C YLR168C SGDID:S0004158, Chr XII from 500272-499580, reverse complement, Uncharacterized ORF	YLR168C	5.69544e-14	-100
YPR119W CLB2 SGDID:S0006323, Chr XVI from 771651-773126, Verified ORF	YPR119W	3.75928e-09	-100		YLR166C SEC10 SGDID:S0004156, Chr XII from 498046-495431, reverse complement, Verified ORF	YLR166C	5.4623e-14	-100
YIL143C SSL2 SGDID:S0001405, Chr IX from 83041-80510, reverse complement, Verified ORF	YIL143C	3.31186e-09	-100		YBL054W YBL054W SGDID:S0000150, Chr II from 117592-119169, Uncharacterized ORF	YBL054W	4.88498e-14	-100
YKL145W RPT1 SGDID:S0001628, Chr XI from 174218-175621, Verified ORF	YKL145W	1.87858e-09	-100		YGL058W RAD6 SGDID:S0003026, Chr VII from 393992-394510, Verified ORF	YGL058W	4.65183e-14	-100
YJL101C GSH1 SGDID:S0003637, Chr X from 236273-234237, reverse complement, Verified ORF	YJL101C	1.56912e-09	-100		YER087W YER087W SGDID:S0000889, Chr V from 330572-332302, Uncharacterized ORF	YER087W	4.44089e-15	-100
YNL054W VAC7 SGDID:S0004999, Chr XIV from 526085-529582, Verified ORF	YNL054W	1.56399e-09	-100		YMR288W HSH155 SGDID:S0004901, Chr XIII from 845570-848485, Verified ORF	YMR288W	1.11022e-15	-100
YOR324C FRT1 SGDID:S0005851, Chr XV from 925035-923227, reverse complement, Verified ORF	YOR324C	1.55717e-09	-100		YGL049C TIF4632 SGDID:S0003017, Chr VII from 409607-406863, reverse complement, Verified ORF	YGL049C	9.99201e-16	-100
YKL098W YKL098W SGDID:S0001581, Chr XI from 256415-257488, Uncharacterized ORF	YKL098W	1.55377e-09	-100		YBR183W YPC1 SGDID:S0000387, Chr II from 596110-597060, Verified ORF	YBR183W	8.88178e-16	-100
YIL055C YIL055C SGDID:S0001317, Chr IX from 253923-252040, reverse complement, Uncharacterized ORF	YIL055C	1.4727e-09	-100		YMR239C RNT1 SGDID:S0004852, Chr XIII from 749676-748261, reverse complement, Verified ORF	YMR239C	8.88178e-16	-100
YIL090W YIL090W SGDID:S0001352, Chr IX from 193592-195067, Uncharacterized ORF	YIL090W	1.46789e-09	-100		YDR110W FOB1 SGDID:S0002517, Chr IV from 676097-677797, Verified ORF	YDR110W	7.77156e-16	-100
YER147C SCC4 SGDID:S0000949, Chr V from 464837-462963, reverse complement, Verified ORF	YER147C	1.46789e-09	-100		YBR154C RPB5 SGDID:S0000358, Chr II from 549003-548356, reverse complement, Verified ORF	YBR154C	2.22045e-16	-100
YAL031C FUN21 SGDID:S0000029, Chr I from 87032-84750, reverse complement, Verified ORF	YAL031C	1.46789e-09	-100		YDL054C MCH1 SGDID:S0002212, Chr IV from 361285-359825, reverse complement, Verified ORF	YDL054C	1.11022e-16	-100
YPL146C YPL146C SGDID:S0006067, Chr XVI from 277528-276161, reverse complement, Uncharacterized ORF	YPL146C	1.46309e-09	-100		YDR228C PCF11 SGDID:S0002636, Chr IV from 923800-921920, reverse complement, Verified ORF	YDR228C	1.11022e-16	-100
YGL020C MDM39 SGDID:S0002988, Chr VII from 457875-457168, reverse complement, Verified ORF	YGL020C	1.4055e-09	-100		YGR255C COQ6 SGDID:S0003487, Chr VII from 1003967-1002528, reverse complement, Verified ORF	YGR255C	1.11022e-16	-100
YKR077W YKR077W SGDID:S0001785, Chr XI from 583295-584386, Uncharacterized ORF	YKR077W	1.39321e-09	-100		YJL005W CYR1 SGDID:S0003542, Chr X from 425072-431152, Verified ORF	YJL005W	1.11022e-16	-100
YPR008W HAA1 SGDID:S0006212, Chr XVI from 573015-575099, Verified ORF	YPR008W	1.29077e-09	-100		YOL081W IRA2 SGDID:S0005441, Chr XV from 171069-180308, Verified ORF	YOL081W	1.11022e-16	-100
YOL044W PEX15 SGDID:S0005404, Chr XV from 247148-248299, Verified ORF	YOL044W	1.18497e-09	-100		YPL231W FAS2 SGDID:S0006152, Chr XVI from 108652-114315, Verified ORF	YPL231W	1.11022e-16	-100
YJR033C RAV1 SGDID:S0003794, Chr X from 496365-492292, reverse complement, Verified ORF	YJR033C	1.18308e-09	-100		YIL115C NUP159 SGDID:S0001377, Chr IX from 148706-144324, reverse complement, Verified ORF	YIL115C	0	-100
YPR030W CSR2 SGDID:S0006234, Chr XVI from 627877-631242, Verified ORF	YPR030W	1.17535e-09	-100		YGL059W YGL059W SGDID:S0003027, Chr VII from 392228-393703, Uncharacterized ORF	YGL059W	0	-100
YDL230W PTP1 SGDID:S0002389, Chr IV from 42701-43708, Verified ORF	YDL230W	1.138e-09	-100		YGL092W NUP145 SGDID:S0003060, Chr VII from 337909-341862, Verified ORF	YGL092W	0	-100
YCR091W KIN82 SGDID:S0000687, Chr III from 274400-276562, Verified ORF	YCR091W	1.13655e-09	-100		YGR141W VPS62 SGDID:S0003373, Chr VII from 770574-771977, Verified ORF	YGR141W	0	-100
YBL072C RPS8A SGDID:S0000168, Chr II from 89123-88521, reverse complement, Verified ORF	YBL072C	1.11406e-09	-100		YJL206C YJL206C SGDID:S0003741, Chr X from 49935-47659, reverse complement, Uncharacterized ORF	YJL206C	0	-100
YOR175C YOR175C SGDID:S0005701, Chr XV from 661674-659815, reverse complement, Uncharacterized ORF	YOR175C	3.52403e-10	-100		YKL105C YKL105C SGDID:S0001588, Chr XI from 242229-238831, reverse complement, Uncharacterized ORF	YKL105C	0	-100
YFL008W SMC1 SGDID:S0001886, Chr VI from 119424-123101, Verified ORF	YFL008W	3.51815e-10	-100		YNR008W LRO1 SGDID:S0005291, Chr XIV from 640396-642381, Verified ORF	YNR008W	0	-100
YMR031C YMR031C SGDID:S0004633, Chr XIII from 334742-332211, reverse complement, Uncharacterized ORF	YMR031C	3.51228e-10	-100		YPL008W CHL1 SGDID:S0005929, Chr XVI from 539382-541967, Verified ORF	YPL008W	0	-100
YDR057W YOS9 SGDID:S0002464, Chr IV from 565924-567552, Verified ORF	YDR057W	3.27024e-10	-100		YAL002W VPS8 SGDID:S0000002, Chr I from 143709-147533, Verified ORF	YAL002W	0	-100
YNL233W BNI4 SGDID:S0005177, Chr XIV from 211921-214599, Verified ORF	YNL233W	3.20548e-10	-100		YAL029C MYO4 SGDID:S0000027, Chr I from 92271-87856, reverse complement, Verified ORF	YAL029C	0	-100
YOR163W DDP1 SGDID:S0005689, Chr XV from 642741-643307, Verified ORF	YOR163W	2.99357e-10	-100		YAR003W SWD1 SGDID:S0000064, Chr I from 155007-156287, Verified ORF	YAR003W	0	-100
YGR179C OKP1 SGDID:S0003411, Chr VII from 854900-853680, reverse complement, Verified ORF	YGR179C	2.89742e-10	-100		YBL008W HIR1 SGDID:S0000104, Chr II from 209656-212178, Verified ORF	YBL008W	0	-100
YHR194W MDM31 SGDID:S0001237, Chr VIII from 488656-490395, Verified ORF	YHR194W	2.75441e-10	-100		YBL011W SCT1 SGDID:S0000107, Chr II from 203541-205820, Verified ORF	YBL011W	0	-100
YKL171W YKL171W SGDID:S0001654, Chr XI from 127480-130266, Uncharacterized ORF	YKL171W	2.74404e-10	-100		YBL082C RHK1 SGDID:S0000178, Chr II from 71124-69748, reverse complement, Verified ORF	YBL082C	0	-100
YPL232W SSO1 SGDID:S0006153, Chr XVI from 107275-108147, Verified ORF	YPL232W	2.61002e-10	-100		YBL084C CDC27 SGDID:S0000180, Chr II from 69442-67166, reverse complement, Verified ORF	YBL084C	0	-100
YGL194C HOS2 SGDID:S0003162, Chr VII from 141732-140374, reverse complement, Verified ORF	YGL194C	2.31261e-10	-100		YBL101C ECM21 SGDID:S0000197, Chr II from 28299-24946, reverse complement, Verified ORF	YBL101C	0	-100
YKL205W LOS1 SGDID:S0001688, Chr XI from 50052-53354, Verified ORF	YKL205W	7.12087e-11	-100		YBR003W COQ1 SGDID:S0000207, Chr II from 242811-244232, Verified ORF	YBR003W	0	-100
YOR030W DFG16 SGDID:S0005556, Chr XV from 386824-388683, Verified ORF	YOR030W	7.11218e-11	-100		YBR006W UGA2 SGDID:S0000210, Chr II from 247012-248505, Verified ORF	YBR006W	0	-100
YBR265W TSC10 SGDID:S0000469, Chr II from 738577-739539, Verified ORF	YBR265W	6.64248e-11	-100		YBR010W HHT1 SGDID:S0000214, Chr II from 256329-256739, Verified ORF	YBR010W	0	-100
YOR340C RPA43 SGDID:S0005867, Chr XV from 960177-959197, reverse complement, Verified ORF	YOR340C	4.47957e-11	-100		YBR069C TAT1 SGDID:S0000273, Chr II from 378430-376571, reverse complement, Verified ORF	YBR069C	0	-100
YDR182W CDC1 SGDID:S0002590, Chr IV from 827577-829052, Verified ORF	YDR182W	4.34688e-11	-100		YCL024W KCC4 SGDID:S0000529, Chr III from 79161-82274, Verified ORF	YCL024W	0	-100
YML097C VPS9 SGDID:S0004563, Chr XIII from 79690-78335, reverse complement, Verified ORF	YML097C	4.29441e-11	-100		YCL044C YCL044C SGDID:S0000549, Chr III from 48364-47111, reverse complement, Uncharacterized ORF	YCL044C	0	-100
YOR090C PTC5 SGDID:S0005616, Chr XV from 492842-491124, reverse complement, Verified ORF	YOR090C	3.73259e-11	-100		YCL056C YCL056C SGDID:S0000561, Chr III from 27359-26925, reverse complement, Uncharacterized ORF	YCL056C	0	-100
YER122C GLO3 SGDID:S0000924, Chr V from 404348-402867, reverse complement, Verified ORF	YER122C	3.73082e-11	-100		YCR066W RAD18 SGDID:S0000662, Chr III from 231495-232958, Verified ORF	YCR066W	0	-100
YMR214W SCJ1 SGDID:S0004827, Chr XIII from 695349-696482, Verified ORF	YMR214W	3.72901e-11	-100		YCR069W CPR4 SGDID:S0000665, Chr III from 239050-240006, Verified ORF	YCR069W	0	-100
YHR175W CTR2 SGDID:S0001218, Chr VIII from 452871-453440, Verified ORF	YHR175W	3.58212e-11	-100		YDL025C YDL025C SGDID:S0002183, Chr IV from 407203-405341, reverse complement, Uncharacterized ORF	YDL025C	0	-100
YER144C UBP5 SGDID:S0000946, Chr V from 460218-457801, reverse complement, Verified ORF	YER144C	3.57524e-11	-100		YDL073W YDL073W SGDID:S0002231, Chr IV from 326613-329567, Uncharacterized ORF	YDL073W	0	-100
YDR184C ATC1 SGDID:S0002592, Chr IV from 831508-830624, reverse complement, Verified ORF	YDR184C	3.57009e-11	-100		YDL114W YDL114W SGDID:S0002272, Chr IV from 255604-256530, Uncharacterized ORF	YDL114W	0	-100
YMR224C MRE11 SGDID:S0004837, Chr XIII from 720652-718574, reverse complement, Verified ORF	YMR224C	3.15086e-11	-100		YDL122W UBP1 SGDID:S0002280, Chr IV from 242552-244981, Verified ORF	YDL122W	0	-100
YDR326C YDR326C SGDID:S0002734, Chr IV from 1124918-1120602, reverse complement, Uncharacterized ORF	YDR326C	1.08875e-11	-100		YDL149W ATG9 SGDID:S0002308, Chr IV from 184926-187919, Verified ORF	YDL149W	0	-100
YPR178W PRP4 SGDID:S0006382, Chr XVI from 892328-893725, Verified ORF	YPR178W	1.08415e-11	-100		YDL185W TFP1 SGDID:S0002344, Chr IV from 126788-130003, Verified ORF	YDL185W	0	-100
YLR045C STU2 SGDID:S0004035, Chr XII from 237704-235038, reverse complement, Verified ORF	YLR045C	1.08415e-11	-100		YDL197C ASF2 SGDID:S0002356, Chr IV from 106495-104918, reverse complement, Verified ORF	YDL197C	0	-100
YOL034W SMC5 SGDID:S0005394, Chr XV from 259923-263204, Verified ORF	YOL034W	1.08236e-11	-100		YDL200C MGT1 SGDID:S0002359, Chr IV from 101122-100502, reverse complement, Verified ORF	YDL200C	0	-100
YLR386W VAC14 SGDID:S0004378, Chr XII from 893628-896270, Verified ORF	YLR386W	1.02209e-11	-100		YDR014W RAD61 SGDID:S0002421, Chr IV from 474043-475986, Verified ORF	YDR014W	0	-100
YAL040C CLN3 SGDID:S0000038, Chr I from 67521-65779, reverse complement, Verified ORF	YAL040C	1.01523e-11	-100		YDR026C YDR026C SGDID:S0002433, Chr IV from 494264-492552, reverse complement, Uncharacterized ORF	YDR026C	0	-100
YPR048W TAH18 SGDID:S0006252, Chr XVI from 659179-661050, Verified ORF	YPR048W	4.17555e-12	-100		YDR067C YDR067C SGDID:S0002474, Chr IV from 583462-582788, reverse complement, Uncharacterized ORF	YDR067C	0	-100
YKL110C KTI12 SGDID:S0001593, Chr XI from 229526-228585, reverse complement, Verified ORF	YKL110C	2.68452e-12	-100		YDR126W SWF1 SGDID:S0002533, Chr IV from 703229-704239, Verified ORF	YDR126W	0	-100
YLR233C EST1 SGDID:S0004223, Chr XII from 609526-607427, reverse complement, Verified ORF	YLR233C	2.68441e-12	-100		YDR147W EKI1 SGDID:S0002554, Chr IV from 751626-753230, Verified ORF	YDR147W	0	-100
YPR007C REC8 SGDID:S0006211, Chr XVI from 571375-569333, reverse complement, Verified ORF	YPR007C	2.59825e-12	-100		YDR160W SSY1 SGDID:S0002567, Chr IV from 776158-778716, Verified ORF	YDR160W	0	-100
YMR129W POM152 SGDID:S0004736, Chr XIII from 527803-531816, Verified ORF	YMR129W	2.59481e-12	-100		YDR179C CSN9 SGDID:S0002586, Chr IV from 819191-818703, reverse complement, Verified ORF	YDR179C	0	-100
YLR115W CFT2 SGDID:S0004105, Chr XII from 377986-380565, Verified ORF	YLR115W	2.51332e-12	-100		YDR183W PLP1 SGDID:S0002591, Chr IV from 829580-830272, Verified ORF	YDR183W	0	-100
YOR288C MPD1 SGDID:S0005814, Chr XV from 853074-852118, reverse complement, Verified ORF	YOR288C	2.43627e-12	-100		YDR227W SIR4 SGDID:S0002635, Chr IV from 917565-921641, Verified ORF	YDR227W	0	-100
YGR055W MUP1 SGDID:S0003287, Chr VII from 599421-601145, Verified ORF	YGR055W	1.77136e-12	-100		YDR282C YDR282C SGDID:S0002690, Chr IV from 1024749-1023505, reverse complement, Uncharacterized ORF	YDR282C	0	-100
YLR225C YLR225C SGDID:S0004215, Chr XII from 588920-587697, reverse complement, Uncharacterized ORF	YLR225C	1.72484e-12	-100		YDR286C YDR286C SGDID:S0002694, Chr IV from 1035569-1035225, reverse complement, Uncharacterized ORF	YDR286C	0	-100
YDR346C SVF1 SGDID:S0002754, Chr IV from 1168651-1167206, reverse complement, Verified ORF	YDR346C	1.10456e-12	-100		YDR301W CFT1 SGDID:S0002709, Chr IV from 1063346-1067419, Verified ORF	YDR301W	0	-100
YHR028C DAP2 SGDID:S0001070, Chr VIII from 167426-164970, reverse complement, Verified ORF	YHR028C	1.10456e-12	-100		YDR323C PEP7 SGDID:S0002731, Chr IV from 1114022-1112475, reverse complement, Verified ORF	YDR323C	0	-100
YLR219W MSC3 SGDID:S0004209, Chr XII from 574153-576339, Verified ORF	YLR219W	1.10401e-12	-100		YDR369C XRS2 SGDID:S0002777, Chr IV from 1217570-1215006, reverse complement, Verified ORF	YDR369C	0	-100
YBL086C YBL086C SGDID:S0000182, Chr II from 62599-61199, reverse complement, Uncharacterized ORF	YBL086C	1.1029e-12	-100		YDR436W PPZ2 SGDID:S0002844, Chr IV from 1334811-1336943, Verified ORF	YDR436W	0	-100
YNL163C RIA1 SGDID:S0005107, Chr XIV from 330073-326741, reverse complement, Verified ORF	YNL163C	1.0546e-12	-100		YDR451C YHP1 SGDID:S0002859, Chr IV from 1362171-1361110, reverse complement, Verified ORF	YDR451C	0	-100
YOR244W ESA1 SGDID:S0005770, Chr XV from 792531-793868, Verified ORF	YOR244W	9.2204e-13	-100		YDR464W SPP41 SGDID:S0002872, Chr IV from 1388862-1393169, Verified ORF	YDR464W	0	-100
YBL106C SRO77 SGDID:S0000202, Chr II from 13879-10847, reverse complement, Verified ORF	YBL106C	4.54192e-13	-100		YDR490C PKH1 SGDID:S0002898, Chr IV from 1434258-1431958, reverse complement, Verified ORF	YDR490C	0	-100
YBR111C YSA1 SGDID:S0000315, Chr II from 461867-461172, reverse complement, Verified ORF	YBR111C	1.27454e-13	-100		YDR506C YDR506C SGDID:S0002914, Chr IV from 1461544-1459718, reverse complement, Uncharacterized ORF	YDR506C	0	-100
YDR457W TOM1 SGDID:S0002865, Chr IV from 1369780-1379586, Verified ORF	YDR457W	6.70575e-14	-100		YDR507C GIN4 SGDID:S0002915, Chr IV from 1465776-1462348, reverse complement, Verified ORF	YDR507C	0	-100
YPR163C TIF3 SGDID:S0006367, Chr XVI from 869951-868641, reverse complement, Verified ORF	YPR163C	6.70575e-14	-100		YEL019C MMS21 SGDID:S0000745, Chr V from 121301-120498, reverse complement, Verified ORF	YEL019C	0	-100
YLR449W FPR4 SGDID:S0004441, Chr XII from 1030829-1032007, Verified ORF	YLR449W	6.69464e-14	-100		YEL030W ECM10 SGDID:S0000756, Chr V from 94644-96578, Verified ORF	YEL030W	0	-100
YKR043C YKR043C SGDID:S0001751, Chr XI from 521354-520539, reverse complement, Uncharacterized ORF	YKR043C	6.68354e-14	-100		YER038C KRE29 SGDID:S0000840, Chr V from 228251-226857, reverse complement, Verified ORF	YER038C	0	-100
YKL212W SAC1 SGDID:S0001695, Chr XI from 34544-36415, Verified ORF	YKL212W	6.55032e-14	-100		YER052C HOM3 SGDID:S0000854, Chr V from 257957-256374, reverse complement, Verified ORF	YER052C	0	-100
YHR115C DMA1 SGDID:S0001157, Chr VIII from 341361-340111, reverse complement, Uncharacterized ORF	YHR115C	6.53921e-14	-100		YER151C UBP3 SGDID:S0000953, Chr V from 472419-469681, reverse complement, Verified ORF	YER151C	0	-100
YJR059W PTK2 SGDID:S0003820, Chr X from 545701-548157, Verified ORF	YJR059W	5.88418e-14	-100		YFL041W FET5 SGDID:S0001853, Chr VI from 49139-51007, Verified ORF	YFL041W	0	-100
YKL146W AVT3 SGDID:S0001629, Chr XI from 171788-173866, Verified ORF	YKL146W	5.88418e-14	-100		YFR002W NIC96 SGDID:S0001898, Chr VI from 150011-152530, Verified ORF	YFR002W	0	-100
YLR168C YLR168C SGDID:S0004158, Chr XII from 500272-499580, reverse complement, Uncharacterized ORF	YLR168C	5.69544e-14	-100		YFR019W FAB1 SGDID:S0001915, Chr VI from 184490-191326, Verified ORF	YFR019W	0	-100
YLR166C SEC10 SGDID:S0004156, Chr XII from 498046-495431, reverse complement, Verified ORF	YLR166C	5.4623e-14	-100		YFR024C-A LSB3 SGDID:S0002968, Chr VI from 203421-203375,203256-201948, reverse complement, Verified ORF	YFR024C-A	0	-100
YBL054W YBL054W SGDID:S0000150, Chr II from 117592-119169, Uncharacterized ORF	YBL054W	4.88498e-14	-100		YFR034C PHO4 SGDID:S0001930, Chr VI from 225946-225008, reverse complement, Verified ORF	YFR034C	0	-100
YGL058W RAD6 SGDID:S0003026, Chr VII from 393992-394510, Verified ORF	YGL058W	4.65183e-14	-100		YGL021W ALK1 SGDID:S0002989, Chr VII from 454790-457072, Verified ORF	YGL021W	0	-100
YER087W YER087W SGDID:S0000889, Chr V from 330572-332302, Uncharacterized ORF	YER087W	4.44089e-15	-100		YGL094C PAN2 SGDID:S0003062, Chr VII from 334468-331121, reverse complement, Verified ORF	YGL094C	0	-100
YMR288W HSH155 SGDID:S0004901, Chr XIII from 845570-848485, Verified ORF	YMR288W	1.11022e-15	-100		YGL145W TIP20 SGDID:S0003113, Chr VII from 230248-232353, Verified ORF	YGL145W	0	-100
YGL049C TIF4632 SGDID:S0003017, Chr VII from 409607-406863, reverse complement, Verified ORF	YGL049C	9.99201e-16	-100		YGL151W NUT1 SGDID:S0003119, Chr VII from 217529-220927, Verified ORF	YGL151W	0	-100
YBR183W YPC1 SGDID:S0000387, Chr II from 596110-597060, Verified ORF	YBR183W	8.88178e-16	-100		YGL174W BUD13 SGDID:S0003142, Chr VII from 174551-175351, Verified ORF	YGL174W	0	-100
YMR239C RNT1 SGDID:S0004852, Chr XIII from 749676-748261, reverse complement, Verified ORF	YMR239C	8.88178e-16	-100		YGL186C TPN1 SGDID:S0003154, Chr VII from 152782-151043, reverse complement, Verified ORF	YGL186C	0	-100
YDR110W FOB1 SGDID:S0002517, Chr IV from 676097-677797, Verified ORF	YDR110W	7.77156e-16	-100		YGL203C KEX1 SGDID:S0003171, Chr VII from 114668-112479, reverse complement, Verified ORF	YGL203C	0	-100
YBR154C RPB5 SGDID:S0000358, Chr II from 549003-548356, reverse complement, Verified ORF	YBR154C	2.22045e-16	-100		YGR003W CUL3 SGDID:S0003235, Chr VII from 500136-502370, Verified ORF	YGR003W	0	-100
YDL054C MCH1 SGDID:S0002212, Chr IV from 361285-359825, reverse complement, Verified ORF	YDL054C	1.11022e-16	-100		YGR059W SPR3 SGDID:S0003291, Chr VII from 607567-609105, Verified ORF	YGR059W	0	-100
YDR228C PCF11 SGDID:S0002636, Chr IV from 923800-921920, reverse complement, Verified ORF	YDR228C	1.11022e-16	-100		YGR091W PRP31 SGDID:S0003323, Chr VII from 666345-667829, Verified ORF	YGR091W	0	-100
YGR255C COQ6 SGDID:S0003487, Chr VII from 1003967-1002528, reverse complement, Verified ORF	YGR255C	1.11022e-16	-100		YGR098C ESP1 SGDID:S0003330, Chr VII from 687462-682570, reverse complement, Verified ORF	YGR098C	0	-100
YJL005W CYR1 SGDID:S0003542, Chr X from 425072-431152, Verified ORF	YJL005W	1.11022e-16	-100		YGR124W ASN2 SGDID:S0003356, Chr VII from 739949-741667, Verified ORF	YGR124W	0	-100
YOL081W IRA2 SGDID:S0005441, Chr XV from 171069-180308, Verified ORF	YOL081W	1.11022e-16	-100		YGR193C PDX1 SGDID:S0003425, Chr VII from 885746-884514, reverse complement, Verified ORF	YGR193C	0	-100
YPL231W FAS2 SGDID:S0006152, Chr XVI from 108652-114315, Verified ORF	YPL231W	1.11022e-16	-100		YGR197C SNG1 SGDID:S0003429, Chr VII from 894145-892502, reverse complement, Verified ORF	YGR197C	0	-100
YIL115C NUP159 SGDID:S0001377, Chr IX from 148706-144324, reverse complement, Verified ORF	YIL115C	0	-100		YGR217W CCH1 SGDID:S0003449, Chr VII from 924699-930818, Verified ORF	YGR217W	0	-100
YGL059W YGL059W SGDID:S0003027, Chr VII from 392228-393703, Uncharacterized ORF	YGL059W	0	-100		YGR220C MRPL9 SGDID:S0003452, Chr VII from 936886-936077, reverse complement, Verified ORF	YGR220C	0	-100
YGL092W NUP145 SGDID:S0003060, Chr VII from 337909-341862, Verified ORF	YGL092W	0	-100		YGR257C MTM1 SGDID:S0003489, Chr VII from 1007311-1006211, reverse complement, Verified ORF	YGR257C	0	-100
YGR141W VPS62 SGDID:S0003373, Chr VII from 770574-771977, Verified ORF	YGR141W	0	-100		YGR268C HUA1 SGDID:S0003500, Chr VII from 1026659-1026063, reverse complement, Uncharacterized ORF	YGR268C	0	-100
YJL206C YJL206C SGDID:S0003741, Chr X from 49935-47659, reverse complement, Uncharacterized ORF	YJL206C	0	-100		YHL024W RIM4 SGDID:S0001016, Chr VIII from 56646-58787, Verified ORF	YHL024W	0	-100
YKL105C YKL105C SGDID:S0001588, Chr XI from 242229-238831, reverse complement, Uncharacterized ORF	YKL105C	0	-100		YHL028W WSC4 SGDID:S0001020, Chr VIII from 48761-50578, Verified ORF	YHL028W	0	-100
YNR008W LRO1 SGDID:S0005291, Chr XIV from 640396-642381, Verified ORF	YNR008W	0	-100		YHL035C VMR1 SGDID:S0001027, Chr VIII from 32754-27976, reverse complement, Uncharacterized ORF	YHL035C	0	-100
YPL008W CHL1 SGDID:S0005929, Chr XVI from 539382-541967, Verified ORF	YPL008W	0	-100		YHR022C YHR022C SGDID:S0001064, Chr VIII from 150337-149567, reverse complement, Uncharacterized ORF	YHR022C	0	-100
YAL002W VPS8 SGDID:S0000002, Chr I from 143709-147533, Verified ORF	YAL002W	0	-100		YHR035W YHR035W SGDID:S0001077, Chr VIII from 178211-180103, Uncharacterized ORF	YHR035W	0	-100
YAL029C MYO4 SGDID:S0000027, Chr I from 92271-87856, reverse complement, Verified ORF	YAL029C	0	-100		YHR058C MED6 SGDID:S0001100, Chr VIII from 219885-218998, reverse complement, Verified ORF	YHR058C	0	-100
YAR003W SWD1 SGDID:S0000064, Chr I from 155007-156287, Verified ORF	YAR003W	0	-100		YHR070W TRM5 SGDID:S0001112, Chr VIII from 234882-236381, Verified ORF	YHR070W	0	-100
YBL008W HIR1 SGDID:S0000104, Chr II from 209656-212178, Verified ORF	YBL008W	0	-100		YHR071W PCL5 SGDID:S0001113, Chr VIII from 237005-237694, Verified ORF	YHR071W	0	-100
YBL011W SCT1 SGDID:S0000107, Chr II from 203541-205820, Verified ORF	YBL011W	0	-100		YHR081W LRP1 SGDID:S0001123, Chr VIII from 267539-268093, Verified ORF	YHR081W	0	-100
YBL082C RHK1 SGDID:S0000178, Chr II from 71124-69748, reverse complement, Verified ORF	YBL082C	0	-100		YHR097C YHR097C SGDID:S0001139, Chr VIII from 298611-298487,298362-297387, reverse complement, Uncharacterized ORF	YHR097C	0	-100
YBL084C CDC27 SGDID:S0000180, Chr II from 69442-67166, reverse complement, Verified ORF	YBL084C	0	-100		YHR150W PEX28 SGDID:S0001193, Chr VIII from 397253-398992, Verified ORF	YHR150W	0	-100
YBL101C ECM21 SGDID:S0000197, Chr II from 28299-24946, reverse complement, Verified ORF	YBL101C	0	-100		YHR154W RTT107 SGDID:S0001197, Chr VIII from 402968-406180, Verified ORF	YHR154W	0	-100
YBR003W COQ1 SGDID:S0000207, Chr II from 242811-244232, Verified ORF	YBR003W	0	-100		YHR196W UTP9 SGDID:S0001239, Chr VIII from 491930-493657, Verified ORF	YHR196W	0	-100
YBR006W UGA2 SGDID:S0000210, Chr II from 247012-248505, Verified ORF	YBR006W	0	-100		YIL024C YIL024C SGDID:S0001286, Chr IX from 309169-308600, reverse complement, Uncharacterized ORF	YIL024C	0	-100
YBR010W HHT1 SGDID:S0000214, Chr II from 256329-256739, Verified ORF	YBR010W	0	-100		YIL047C SYG1 SGDID:S0001309, Chr IX from 267822-265114, reverse complement, Verified ORF	YIL047C	0	-100
YBR069C TAT1 SGDID:S0000273, Chr II from 378430-376571, reverse complement, Verified ORF	YBR069C	0	-100		YIL146C ECM37 SGDID:S0001408, Chr IX from 75773-74184, reverse complement, Verified ORF	YIL146C	0	-100
YCL024W KCC4 SGDID:S0000529, Chr III from 79161-82274, Verified ORF	YCL024W	0	-100		YIL149C MLP2 SGDID:S0001411, Chr IX from 68067-63028, reverse complement, Verified ORF	YIL149C	0	-100
YCL044C YCL044C SGDID:S0000549, Chr III from 48364-47111, reverse complement, Uncharacterized ORF	YCL044C	0	-100		YIL150C MCM10 SGDID:S0001412, Chr IX from 62728-61013, reverse complement, Verified ORF	YIL150C	0	-100
YCL056C YCL056C SGDID:S0000561, Chr III from 27359-26925, reverse complement, Uncharacterized ORF	YCL056C	0	-100		YJL008C CCT8 SGDID:S0003545, Chr X from 421578-419872, reverse complement, Verified ORF	YJL008C	0	-100
YCR066W RAD18 SGDID:S0000662, Chr III from 231495-232958, Verified ORF	YCR066W	0	-100		YJL042W MHP1 SGDID:S0003578, Chr X from 361165-365361, Verified ORF	YJL042W	0	-100
YCR069W CPR4 SGDID:S0000665, Chr III from 239050-240006, Verified ORF	YCR069W	0	-100		YJL122W YJL122W SGDID:S0003658, Chr X from 189636-190163, Uncharacterized ORF	YJL122W	0	-100
YDL025C YDL025C SGDID:S0002183, Chr IV from 407203-405341, reverse complement, Uncharacterized ORF	YDL025C	0	-100		YJL143W TIM17 SGDID:S0003679, Chr X from 147019-147495, Verified ORF	YJL143W	0	-100
YDL073W YDL073W SGDID:S0002231, Chr IV from 326613-329567, Uncharacterized ORF	YDL073W	0	-100		YJL172W CPS1 SGDID:S0003708, Chr X from 97731-99461, Verified ORF	YJL172W	0	-100
YDL114W YDL114W SGDID:S0002272, Chr IV from 255604-256530, Uncharacterized ORF	YDL114W	0	-100		YJL176C SWI3 SGDID:S0003712, Chr X from 94528-92051, reverse complement, Verified ORF	YJL176C	0	-100
YDL122W UBP1 SGDID:S0002280, Chr IV from 242552-244981, Verified ORF	YDL122W	0	-100		YJL209W CBP1 SGDID:S0003745, Chr X from 38005-39969, Verified ORF	YJL209W	0	-100
YDL149W ATG9 SGDID:S0002308, Chr IV from 184926-187919, Verified ORF	YDL149W	0	-100		YJR024C YJR024C SGDID:S0003785, Chr X from 470878-470144, reverse complement, Uncharacterized ORF	YJR024C	0	-100
YDL185W TFP1 SGDID:S0002344, Chr IV from 126788-130003, Verified ORF	YDL185W	0	-100		YJR053W BFA1 SGDID:S0003814, Chr X from 533941-535665, Verified ORF	YJR053W	0	-100
YDL197C ASF2 SGDID:S0002356, Chr IV from 106495-104918, reverse complement, Verified ORF	YDL197C	0	-100		YJR066W TOR1 SGDID:S0003827, Chr X from 559330-566742, Verified ORF	YJR066W	0	-100
YDL200C MGT1 SGDID:S0002359, Chr IV from 101122-100502, reverse complement, Verified ORF	YDL200C	0	-100		YJR105W ADO1 SGDID:S0003866, Chr X from 623494-624516, Verified ORF	YJR105W	0	-100
YDR014W RAD61 SGDID:S0002421, Chr IV from 474043-475986, Verified ORF	YDR014W	0	-100		YJR132W NMD5 SGDID:S0003893, Chr X from 669437-672583, Verified ORF	YJR132W	0	-100
YDR026C YDR026C SGDID:S0002433, Chr IV from 494264-492552, reverse complement, Uncharacterized ORF	YDR026C	0	-100		YJR144W MGM101 SGDID:S0003905, Chr X from 700797-701606, Verified ORF	YJR144W	0	-100
YDR067C YDR067C SGDID:S0002474, Chr IV from 583462-582788, reverse complement, Uncharacterized ORF	YDR067C	0	-100		YKL021C MAK11 SGDID:S0001504, Chr XI from 398393-396987, reverse complement, Verified ORF	YKL021C	0	-100
YDR126W SWF1 SGDID:S0002533, Chr IV from 703229-704239, Verified ORF	YDR126W	0	-100		YKL174C YKL174C SGDID:S0001657, Chr XI from 122241-120385, reverse complement, Uncharacterized ORF	YKL174C	0	-100
YDR147W EKI1 SGDID:S0002554, Chr IV from 751626-753230, Verified ORF	YDR147W	0	-100		YKL203C TOR2 SGDID:S0001686, Chr XI from 63360-55936, reverse complement, Verified ORF	YKL203C	0	-100
YDR160W SSY1 SGDID:S0002567, Chr IV from 776158-778716, Verified ORF	YDR160W	0	-100		YKR022C YKR022C SGDID:S0001730, Chr XI from 482782-481814, reverse complement, Uncharacterized ORF	YKR022C	0	-100
YDR179C CSN9 SGDID:S0002586, Chr IV from 819191-818703, reverse complement, Verified ORF	YDR179C	0	-100		YKR024C DBP7 SGDID:S0001732, Chr XI from 487015-484787, reverse complement, Verified ORF	YKR024C	0	-100
YDR183W PLP1 SGDID:S0002591, Chr IV from 829580-830272, Verified ORF	YDR183W	0	-100		YKR030W GMH1 SGDID:S0001738, Chr XI from 499924-500745, Verified ORF	YKR030W	0	-100
YDR227W SIR4 SGDID:S0002635, Chr IV from 917565-921641, Verified ORF	YDR227W	0	-100		YKR054C DYN1 SGDID:S0001762, Chr XI from 547567-535289, reverse complement, Verified ORF	YKR054C	0	-100
YDR282C YDR282C SGDID:S0002690, Chr IV from 1024749-1023505, reverse complement, Uncharacterized ORF	YDR282C	0	-100		YKR090W PXL1 SGDID:S0001798, Chr XI from 608588-610708, Verified ORF	YKR090W	0	-100
YDR286C YDR286C SGDID:S0002694, Chr IV from 1035569-1035225, reverse complement, Uncharacterized ORF	YDR286C	0	-100		YLL029W YLL029W SGDID:S0003952, Chr XII from 81460-83709, Uncharacterized ORF	YLL029W	0	-100
YDR301W CFT1 SGDID:S0002709, Chr IV from 1063346-1067419, Verified ORF	YDR301W	0	-100		YLL033W YLL033W SGDID:S0003956, Chr XII from 73408-74100, Uncharacterized ORF	YLL033W	0	-100
YDR323C PEP7 SGDID:S0002731, Chr IV from 1114022-1112475, reverse complement, Verified ORF	YDR323C	0	-100		YLR005W SSL1 SGDID:S0003995, Chr XII from 160048-161433, Verified ORF	YLR005W	0	-100
YDR369C XRS2 SGDID:S0002777, Chr IV from 1217570-1215006, reverse complement, Verified ORF	YDR369C	0	-100		YLR057W YLR057W SGDID:S0004047, Chr XII from 255307-257856, Uncharacterized ORF	YLR057W	0	-100
YDR436W PPZ2 SGDID:S0002844, Chr IV from 1334811-1336943, Verified ORF	YDR436W	0	-100		YLR067C PET309 SGDID:S0004057, Chr XII from 270711-267814, reverse complement, Verified ORF	YLR067C	0	-100
YDR451C YHP1 SGDID:S0002859, Chr IV from 1362171-1361110, reverse complement, Verified ORF	YDR451C	0	-100		YLR105C SEN2 SGDID:S0004095, Chr XII from 348181-347048, reverse complement, Verified ORF	YLR105C	0	-100
YDR464W SPP41 SGDID:S0002872, Chr IV from 1388862-1393169, Verified ORF	YDR464W	0	-100		YLR141W RRN5 SGDID:S0004131, Chr XII from 423684-424775, Verified ORF	YLR141W	0	-100
YDR490C PKH1 SGDID:S0002898, Chr IV from 1434258-1431958, reverse complement, Verified ORF	YDR490C	0	-100		YLR201C FMP53 SGDID:S0004191, Chr XII from 550295-549513, reverse complement, Uncharacterized ORF	YLR201C	0	-100
YDR506C YDR506C SGDID:S0002914, Chr IV from 1461544-1459718, reverse complement, Uncharacterized ORF	YDR506C	0	-100		YLR205C HMX1 SGDID:S0004195, Chr XII from 553679-552726, reverse complement, Verified ORF	YLR205C	0	-100
YDR507C GIN4 SGDID:S0002915, Chr IV from 1465776-1462348, reverse complement, Verified ORF	YDR507C	0	-100		YLR242C ARV1 SGDID:S0004232, Chr XII from 623885-622920, reverse complement, Verified ORF	YLR242C	0	-100
YEL019C MMS21 SGDID:S0000745, Chr V from 121301-120498, reverse complement, Verified ORF	YEL019C	0	-100		YLR247C YLR247C SGDID:S0004237, Chr XII from 633356-628686, reverse complement, Uncharacterized ORF	YLR247C	0	-100
YEL030W ECM10 SGDID:S0000756, Chr V from 94644-96578, Verified ORF	YEL030W	0	-100		YLR267W BOP2 SGDID:S0004257, Chr XII from 678214-679926, Uncharacterized ORF	YLR267W	0	-100
YER038C KRE29 SGDID:S0000840, Chr V from 228251-226857, reverse complement, Verified ORF	YER038C	0	-100		YLR318W EST2 SGDID:S0004310, Chr XII from 766542-769196, Verified ORF	YLR318W	0	-100
YER052C HOM3 SGDID:S0000854, Chr V from 257957-256374, reverse complement, Verified ORF	YER052C	0	-100		YLR319C BUD6 SGDID:S0004311, Chr XII from 771684-769318, reverse complement, Verified ORF	YLR319C	0	-100
YER151C UBP3 SGDID:S0000953, Chr V from 472419-469681, reverse complement, Verified ORF	YER151C	0	-100		YLR337C VRP1 SGDID:S0004329, Chr XII from 805106-802653, reverse complement, Verified ORF	YLR337C	0	-100
YFL041W FET5 SGDID:S0001853, Chr VI from 49139-51007, Verified ORF	YFL041W	0	-100		YLR353W BUD8 SGDID:S0004345, Chr XII from 834351-836162, Verified ORF	YLR353W	0	-100
YFR002W NIC96 SGDID:S0001898, Chr VI from 150011-152530, Verified ORF	YFR002W	0	-100		YLR373C VID22 SGDID:S0004365, Chr XII from 871366-868661, reverse complement, Verified ORF	YLR373C	0	-100
YFR019W FAB1 SGDID:S0001915, Chr VI from 184490-191326, Verified ORF	YFR019W	0	-100		YLR384C IKI3 SGDID:S0004376, Chr XII from 892900-888851, reverse complement, Verified ORF	YLR384C	0	-100
YFR024C-A LSB3 SGDID:S0002968, Chr VI from 203421-203375,203256-201948, reverse complement, Verified ORF	YFR024C-A	0	-100		YLR414C YLR414C SGDID:S0004406, Chr XII from 954140-953349, reverse complement, Uncharacterized ORF	YLR414C	0	-100
YFR034C PHO4 SGDID:S0001930, Chr VI from 225946-225008, reverse complement, Verified ORF	YFR034C	0	-100		YML005W TRM12 SGDID:S0004464, Chr XIII from 260221-261609, Uncharacterized ORF	YML005W	0	-100
YGL021W ALK1 SGDID:S0002989, Chr VII from 454790-457072, Verified ORF	YGL021W	0	-100		YML032C RAD52 SGDID:S0004494, Chr XIII from 213930-212515, reverse complement, Verified ORF	YML032C	0	-100
YGL094C PAN2 SGDID:S0003062, Chr VII from 334468-331121, reverse complement, Verified ORF	YGL094C	0	-100		YML042W CAT2 SGDID:S0004506, Chr XIII from 192788-194800, Verified ORF	YML042W	0	-100
YGL145W TIP20 SGDID:S0003113, Chr VII from 230248-232353, Verified ORF	YGL145W	0	-100		YML050W YML050W SGDID:S0004514, Chr XIII from 173139-174074, Uncharacterized ORF	YML050W	0	-100
YGL151W NUT1 SGDID:S0003119, Chr VII from 217529-220927, Verified ORF	YGL151W	0	-100		YML056C IMD4 SGDID:S0004520, Chr XIII from 164176-163717,163308-162194, reverse complement, Verified ORF	YML056C	0	-100
YGL174W BUD13 SGDID:S0003142, Chr VII from 174551-175351, Verified ORF	YGL174W	0	-100		YML088W UFO1 SGDID:S0004553, Chr XIII from 92235-94241, Verified ORF	YML088W	0	-100
YGL186C TPN1 SGDID:S0003154, Chr VII from 152782-151043, reverse complement, Verified ORF	YGL186C	0	-100		YML103C NUP188 SGDID:S0004571, Chr XIII from 67549-62582, reverse complement, Verified ORF	YML103C	0	-100
YGL203C KEX1 SGDID:S0003171, Chr VII from 114668-112479, reverse complement, Verified ORF	YGL203C	0	-100		YMR036C MIH1 SGDID:S0004639, Chr XIII from 343519-341855, reverse complement, Verified ORF	YMR036C	0	-100
YGR003W CUL3 SGDID:S0003235, Chr VII from 500136-502370, Verified ORF	YGR003W	0	-100		YMR037C MSN2 SGDID:S0004640, Chr XIII from 346516-344402, reverse complement, Verified ORF	YMR037C	0	-100
YGR059W SPR3 SGDID:S0003291, Chr VII from 607567-609105, Verified ORF	YGR059W	0	-100		YMR096W SNZ1 SGDID:S0004702, Chr XIII from 458407-459300, Verified ORF	YMR096W	0	-100
YGR091W PRP31 SGDID:S0003323, Chr VII from 666345-667829, Verified ORF	YGR091W	0	-100		YMR144W YMR144W SGDID:S0004752, Chr XIII from 553361-554389, Uncharacterized ORF	YMR144W	0	-100
YGR098C ESP1 SGDID:S0003330, Chr VII from 687462-682570, reverse complement, Verified ORF	YGR098C	0	-100		YMR145C NDE1 SGDID:S0004753, Chr XIII from 556474-554792, reverse complement, Verified ORF	YMR145C	0	-100
YGR124W ASN2 SGDID:S0003356, Chr VII from 739949-741667, Verified ORF	YGR124W	0	-100		YMR164C MSS11 SGDID:S0004774, Chr XIII from 589549-587273, reverse complement, Verified ORF	YMR164C	0	-100
YGR193C PDX1 SGDID:S0003425, Chr VII from 885746-884514, reverse complement, Verified ORF	YGR193C	0	-100		YMR191W SPG5 SGDID:S0004803, Chr XIII from 645655-646776, Uncharacterized ORF	YMR191W	0	-100
YGR197C SNG1 SGDID:S0003429, Chr VII from 894145-892502, reverse complement, Verified ORF	YGR197C	0	-100		YMR234W RNH1 SGDID:S0004847, Chr XIII from 740265-741311, Verified ORF	YMR234W	0	-100
YGR217W CCH1 SGDID:S0003449, Chr VII from 924699-930818, Verified ORF	YGR217W	0	-100		YMR257C PET111 SGDID:S0004870, Chr XIII from 782030-779628, reverse complement, Verified ORF	YMR257C	0	-100
YGR220C MRPL9 SGDID:S0003452, Chr VII from 936886-936077, reverse complement, Verified ORF	YGR220C	0	-100		YMR259C YMR259C SGDID:S0004872, Chr XIII from 788882-784620, reverse complement, Uncharacterized ORF	YMR259C	0	-100
YGR257C MTM1 SGDID:S0003489, Chr VII from 1007311-1006211, reverse complement, Verified ORF	YGR257C	0	-100		YMR268C PRP24 SGDID:S0004881, Chr XIII from 804221-802887, reverse complement, Verified ORF	YMR268C	0	-100
YGR268C HUA1 SGDID:S0003500, Chr VII from 1026659-1026063, reverse complement, Uncharacterized ORF	YGR268C	0	-100		YNL031C HHT2 SGDID:S0004976, Chr XIV from 576049-575639, reverse complement, Verified ORF	YNL031C	0	-100
YHL024W RIM4 SGDID:S0001016, Chr VIII from 56646-58787, Verified ORF	YHL024W	0	-100		YNL047C SLM2 SGDID:S0004992, Chr XIV from 541880-539910, reverse complement, Uncharacterized ORF	YNL047C	0	-100
YHL028W WSC4 SGDID:S0001020, Chr VIII from 48761-50578, Verified ORF	YHL028W	0	-100		YNL087W TCB2 SGDID:S0005031, Chr XIV from 462411-465947, Verified ORF	YNL087W	0	-100
YHL035C VMR1 SGDID:S0001027, Chr VIII from 32754-27976, reverse complement, Uncharacterized ORF	YHL035C	0	-100		YNL091W NST1 SGDID:S0005035, Chr XIV from 452408-456130, Verified ORF	YNL091W	0	-100
YHR022C YHR022C SGDID:S0001064, Chr VIII from 150337-149567, reverse complement, Uncharacterized ORF	YHR022C	0	-100		YNL093W YPT53 SGDID:S0005037, Chr XIV from 449868-450530, Verified ORF	YNL093W	0	-100
YHR035W YHR035W SGDID:S0001077, Chr VIII from 178211-180103, Uncharacterized ORF	YHR035W	0	-100		YNL106C INP52 SGDID:S0005050, Chr XIV from 424495-420944, reverse complement, Verified ORF	YNL106C	0	-100
YHR058C MED6 SGDID:S0001100, Chr VIII from 219885-218998, reverse complement, Verified ORF	YHR058C	0	-100		YNL118C DCP2 SGDID:S0005062, Chr XIV from 405564-402652, reverse complement, Verified ORF	YNL118C	0	-100
YHR070W TRM5 SGDID:S0001112, Chr VIII from 234882-236381, Verified ORF	YHR070W	0	-100		YNL159C ASI2 SGDID:S0005103, Chr XIV from 339347-338478, reverse complement, Verified ORF	YNL159C	0	-100
YHR071W PCL5 SGDID:S0001113, Chr VIII from 237005-237694, Verified ORF	YHR071W	0	-100		YNL172W APC1 SGDID:S0005116, Chr XIV from 310636-315882, Verified ORF	YNL172W	0	-100
YHR081W LRP1 SGDID:S0001123, Chr VIII from 267539-268093, Verified ORF	YHR081W	0	-100		YNL173C MDG1 SGDID:S0005117, Chr XIV from 310057-308957, reverse complement, Verified ORF	YNL173C	0	-100
YHR097C YHR097C SGDID:S0001139, Chr VIII from 298611-298487,298362-297387, reverse complement, Uncharacterized ORF	YHR097C	0	-100		YNL183C NPR1 SGDID:S0005127, Chr XIV from 295509-293137, reverse complement, Verified ORF	YNL183C	0	-100
YHR150W PEX28 SGDID:S0001193, Chr VIII from 397253-398992, Verified ORF	YHR150W	0	-100		YNL225C CNM67 SGDID:S0005169, Chr XIV from 224468-222723, reverse complement, Verified ORF	YNL225C	0	-100
YHR154W RTT107 SGDID:S0001197, Chr VIII from 402968-406180, Verified ORF	YHR154W	0	-100		YNL257C SIP3 SGDID:S0005201, Chr XIV from 164319-160630, reverse complement, Verified ORF	YNL257C	0	-100
YHR196W UTP9 SGDID:S0001239, Chr VIII from 491930-493657, Verified ORF	YHR196W	0	-100		YNL308C KRI1 SGDID:S0005252, Chr XIV from 55896-54121, reverse complement, Verified ORF	YNL308C	0	-100
YIL024C YIL024C SGDID:S0001286, Chr IX from 309169-308600, reverse complement, Uncharacterized ORF	YIL024C	0	-100		YOL063C HUS1 SGDID:S0005424, Chr XV from 210264-207391, reverse complement, Uncharacterized ORF	YOL063C	0	-100
YIL047C SYG1 SGDID:S0001309, Chr IX from 267822-265114, reverse complement, Verified ORF	YIL047C	0	-100		YOL082W ATG19 SGDID:S0005442, Chr XV from 168726-169973, Verified ORF	YOL082W	0	-100
YIL146C ECM37 SGDID:S0001408, Chr IX from 75773-74184, reverse complement, Verified ORF	YIL146C	0	-100		YOL105C WSC3 SGDID:S0005465, Chr XV from 115807-114137, reverse complement, Verified ORF	YOL105C	0	-100
YIL149C MLP2 SGDID:S0001411, Chr IX from 68067-63028, reverse complement, Verified ORF	YIL149C	0	-100		YOL125W YOL125W SGDID:S0005485, Chr XV from 83833-85263, Uncharacterized ORF	YOL125W	0	-100
YIL150C MCM10 SGDID:S0001412, Chr IX from 62728-61013, reverse complement, Verified ORF	YIL150C	0	-100		YOL130W ALR1 SGDID:S0005490, Chr XV from 74399-76978, Verified ORF	YOL130W	0	-100
YJL008C CCT8 SGDID:S0003545, Chr X from 421578-419872, reverse complement, Verified ORF	YJL008C	0	-100		YOL135C MED7 SGDID:S0005495, Chr XV from 70043-69375, reverse complement, Verified ORF	YOL135C	0	-100
YJL042W MHP1 SGDID:S0003578, Chr X from 361165-365361, Verified ORF	YJL042W	0	-100		YOR005C DNL4 SGDID:S0005531, Chr XV from 337343-334509, reverse complement, Verified ORF	YOR005C	0	-100
YJL122W YJL122W SGDID:S0003658, Chr X from 189636-190163, Uncharacterized ORF	YJL122W	0	-100		YOR008C SLG1 SGDID:S0005534, Chr XV from 342414-341278, reverse complement, Verified ORF	YOR008C	0	-100
YJL143W TIM17 SGDID:S0003679, Chr X from 147019-147495, Verified ORF	YJL143W	0	-100		YOR107W RGS2 SGDID:S0005633, Chr XV from 521353-522282, Verified ORF	YOR107W	0	-100
YJL172W CPS1 SGDID:S0003708, Chr X from 97731-99461, Verified ORF	YJL172W	0	-100		YOR114W YOR114W SGDID:S0005640, Chr XV from 537570-538454, Uncharacterized ORF	YOR114W	0	-100
YJL176C SWI3 SGDID:S0003712, Chr X from 94528-92051, reverse complement, Verified ORF	YJL176C	0	-100		YOR118W YOR118W SGDID:S0005644, Chr XV from 546857-548560, Uncharacterized ORF	YOR118W	0	-100
YJL209W CBP1 SGDID:S0003745, Chr X from 38005-39969, Verified ORF	YJL209W	0	-100		YOR149C SMP3 SGDID:S0005675, Chr XV from 611388-609838, reverse complement, Verified ORF	YOR149C	0	-100
YJR024C YJR024C SGDID:S0003785, Chr X from 470878-470144, reverse complement, Uncharacterized ORF	YJR024C	0	-100		YOR162C YRR1 SGDID:S0005688, Chr XV from 641992-639560, reverse complement, Verified ORF	YOR162C	0	-100
YJR053W BFA1 SGDID:S0003814, Chr X from 533941-535665, Verified ORF	YJR053W	0	-100		YOR166C YOR166C SGDID:S0005692, Chr XV from 648502-647126, reverse complement, Uncharacterized ORF	YOR166C	0	-100
YJR066W TOR1 SGDID:S0003827, Chr X from 559330-566742, Verified ORF	YJR066W	0	-100		YOR173W DCS2 SGDID:S0005699, Chr XV from 657132-658325, Verified ORF	YOR173W	0	-100
YJR105W ADO1 SGDID:S0003866, Chr X from 623494-624516, Verified ORF	YJR105W	0	-100		YOR193W PEX27 SGDID:S0005719, Chr XV from 710446-711576, Verified ORF	YOR193W	0	-100
YJR132W NMD5 SGDID:S0003893, Chr X from 669437-672583, Verified ORF	YJR132W	0	-100		YOR205C FMP38 SGDID:S0005731, Chr XV from 727234-725564, reverse complement, Uncharacterized ORF	YOR205C	0	-100
YJR144W MGM101 SGDID:S0003905, Chr X from 700797-701606, Verified ORF	YJR144W	0	-100		YOR208W PTP2 SGDID:S0005734, Chr XV from 733925-736177, Verified ORF	YOR208W	0	-100
YKL021C MAK11 SGDID:S0001504, Chr XI from 398393-396987, reverse complement, Verified ORF	YKL021C	0	-100		YOR220W YOR220W SGDID:S0005746, Chr XV from 755328-756125, Uncharacterized ORF	YOR220W	0	-100
YKL174C YKL174C SGDID:S0001657, Chr XI from 122241-120385, reverse complement, Uncharacterized ORF	YKL174C	0	-100		YOR226C ISU2 SGDID:S0005752, Chr XV from 762084-761614, reverse complement, Verified ORF	YOR226C	0	-100
YKL203C TOR2 SGDID:S0001686, Chr XI from 63360-55936, reverse complement, Verified ORF	YKL203C	0	-100		YOR233W KIN4 SGDID:S0005759, Chr XV from 775846-778248, Verified ORF	YOR233W	0	-100
YKR022C YKR022C SGDID:S0001730, Chr XI from 482782-481814, reverse complement, Uncharacterized ORF	YKR022C	0	-100		YOR236W DFR1 SGDID:S0005762, Chr XV from 780906-781541, Verified ORF	YOR236W	0	-100
YKR024C DBP7 SGDID:S0001732, Chr XI from 487015-484787, reverse complement, Verified ORF	YKR024C	0	-100		YOR239W ABP140 SGDID:S0005765, Chr XV from 784857-785687,785689-786744, Verified ORF	YOR239W	0	-100
YKR030W GMH1 SGDID:S0001738, Chr XI from 499924-500745, Verified ORF	YKR030W	0	-100		YOR255W OSW1 SGDID:S0005781, Chr XV from 807270-808106, Uncharacterized ORF	YOR255W	0	-100
YKR054C DYN1 SGDID:S0001762, Chr XI from 547567-535289, reverse complement, Verified ORF	YKR054C	0	-100		YOR278W HEM4 SGDID:S0005804, Chr XV from 842814-843641, Verified ORF	YOR278W	0	-100
YKR090W PXL1 SGDID:S0001798, Chr XI from 608588-610708, Verified ORF	YKR090W	0	-100		YOR287C YOR287C SGDID:S0005813, Chr XV from 851836-850934, reverse complement, Uncharacterized ORF	YOR287C	0	-100
YLL029W YLL029W SGDID:S0003952, Chr XII from 81460-83709, Uncharacterized ORF	YLL029W	0	-100		YOR296W YOR296W SGDID:S0005822, Chr XV from 870199-874068, Uncharacterized ORF	YOR296W	0	-100
YLL033W YLL033W SGDID:S0003956, Chr XII from 73408-74100, Uncharacterized ORF	YLL033W	0	-100		YOR308C SNU66 SGDID:S0005835, Chr XV from 896382-894619, reverse complement, Verified ORF	YOR308C	0	-100
YLR005W SSL1 SGDID:S0003995, Chr XII from 160048-161433, Verified ORF	YLR005W	0	-100		YOR354C MSC6 SGDID:S0005881, Chr XV from 1003220-1001142, reverse complement, Verified ORF	YOR354C	0	-100
YLR057W YLR057W SGDID:S0004047, Chr XII from 255307-257856, Uncharacterized ORF	YLR057W	0	-100		YOR360C PDE2 SGDID:S0005887, Chr XV from 1014817-1013237, reverse complement, Verified ORF	YOR360C	0	-100
YLR067C PET309 SGDID:S0004057, Chr XII from 270711-267814, reverse complement, Verified ORF	YLR067C	0	-100		YOR368W RAD17 SGDID:S0005895, Chr XV from 1026839-1028044, Verified ORF	YOR368W	0	-100
YLR105C SEN2 SGDID:S0004095, Chr XII from 348181-347048, reverse complement, Verified ORF	YLR105C	0	-100		YPL007C TFC8 SGDID:S0005928, Chr XVI from 543845-542079, reverse complement, Verified ORF	YPL007C	0	-100
YLR141W RRN5 SGDID:S0004131, Chr XII from 423684-424775, Verified ORF	YLR141W	0	-100		YPL033C YPL033C SGDID:S0005954, Chr XVI from 488205-487360, reverse complement, Uncharacterized ORF	YPL033C	0	-100
YLR201C FMP53 SGDID:S0004191, Chr XII from 550295-549513, reverse complement, Uncharacterized ORF	YLR201C	0	-100		YPL034W YPL034W SGDID:S0005955, Chr XVI from 486710-487207, Uncharacterized ORF	YPL034W	0	-100
YLR205C HMX1 SGDID:S0004195, Chr XII from 553679-552726, reverse complement, Verified ORF	YLR205C	0	-100		YPL038W MET31 SGDID:S0005959, Chr XVI from 480532-481065, Verified ORF	YPL038W	0	-100
YLR242C ARV1 SGDID:S0004232, Chr XII from 623885-622920, reverse complement, Verified ORF	YLR242C	0	-100		YPL039W YPL039W SGDID:S0005960, Chr XVI from 479222-480172, Uncharacterized ORF	YPL039W	0	-100
YLR247C YLR247C SGDID:S0004237, Chr XII from 633356-628686, reverse complement, Uncharacterized ORF	YLR247C	0	-100		YPL042C SSN3 SGDID:S0005963, Chr XVI from 474704-473037, reverse complement, Verified ORF	YPL042C	0	-100
YLR267W BOP2 SGDID:S0004257, Chr XII from 678214-679926, Uncharacterized ORF	YLR267W	0	-100		YPL109C YPL109C SGDID:S0006030, Chr XVI from 347388-345596,345443-345263, reverse complement, Uncharacterized ORF	YPL109C	0	-100
YLR318W EST2 SGDID:S0004310, Chr XII from 766542-769196, Verified ORF	YLR318W	0	-100		YPL124W SPC29 SGDID:S0006045, Chr XVI from 316754-317515, Verified ORF	YPL124W	0	-100
YLR319C BUD6 SGDID:S0004311, Chr XII from 771684-769318, reverse complement, Verified ORF	YLR319C	0	-100		YPL151C PRP46 SGDID:S0006072, Chr XVI from 267534-266179, reverse complement, Verified ORF	YPL151C	0	-100
YLR337C VRP1 SGDID:S0004329, Chr XII from 805106-802653, reverse complement, Verified ORF	YLR337C	0	-100		YPL174C NIP100 SGDID:S0006095, Chr XVI from 222772-220166, reverse complement, Verified ORF	YPL174C	0	-100
YLR353W BUD8 SGDID:S0004345, Chr XII from 834351-836162, Verified ORF	YLR353W	0	-100		YPL242C IQG1 SGDID:S0006163, Chr XVI from 95109-90622, reverse complement, Verified ORF	YPL242C	0	-100
YLR373C VID22 SGDID:S0004365, Chr XII from 871366-868661, reverse complement, Verified ORF	YLR373C	0	-100		YPL243W SRP68 SGDID:S0006164, Chr XVI from 88517-90316, Verified ORF	YPL243W	0	-100
YLR384C IKI3 SGDID:S0004376, Chr XII from 892900-888851, reverse complement, Verified ORF	YLR384C	0	-100		YPL250C ICY2 SGDID:S0006171, Chr XVI from 74719-74309, reverse complement, Uncharacterized ORF	YPL250C	0	-100
YLR414C YLR414C SGDID:S0004406, Chr XII from 954140-953349, reverse complement, Uncharacterized ORF	YLR414C	0	-100		YPL255W BBP1 SGDID:S0006176, Chr XVI from 67725-68882, Verified ORF	YPL255W	0	-100
YML005W TRM12 SGDID:S0004464, Chr XIII from 260221-261609, Uncharacterized ORF	YML005W	0	-100		YPL270W MDL2 SGDID:S0006191, Chr XVI from 30482-32803, Verified ORF	YPL270W	0	-100
YML032C RAD52 SGDID:S0004494, Chr XIII from 213930-212515, reverse complement, Verified ORF	YML032C	0	-100		YPR013C YPR013C SGDID:S0006217, Chr XVI from 585582-584629, reverse complement, Uncharacterized ORF	YPR013C	0	-100
YML042W CAT2 SGDID:S0004506, Chr XIII from 192788-194800, Verified ORF	YML042W	0	-100		YPR036W-A YPR036W-A SGDID:S0028425, Chr XVI from 645947-646150, Uncharacterized ORF	YPR036W-A	0	-100
YML050W YML050W SGDID:S0004514, Chr XIII from 173139-174074, Uncharacterized ORF	YML050W	0	-100		YPR051W MAK3 SGDID:S0006255, Chr XVI from 664957-665487, Verified ORF	YPR051W	0	-100
YML056C IMD4 SGDID:S0004520, Chr XIII from 164176-163717,163308-162194, reverse complement, Verified ORF	YML056C	0	-100		YPR057W BRR1 SGDID:S0006261, Chr XVI from 672468-673493, Verified ORF	YPR057W	0	-100
YML088W UFO1 SGDID:S0004553, Chr XIII from 92235-94241, Verified ORF	YML088W	0	-100		YPR089W YPR089W SGDID:S0006293, Chr XVI from 713273-715939, Uncharacterized ORF	YPR089W	0	-100
YML103C NUP188 SGDID:S0004571, Chr XIII from 67549-62582, reverse complement, Verified ORF	YML103C	0	-100		YPR141C KAR3 SGDID:S0006345, Chr XVI from 817919-815730, reverse complement, Verified ORF	YPR141C	0	-100
YMR036C MIH1 SGDID:S0004639, Chr XIII from 343519-341855, reverse complement, Verified ORF	YMR036C	0	-100		YPR144C NOC4 SGDID:S0006348, Chr XVI from 821419-819761, reverse complement, Verified ORF	YPR144C	0	-100
YMR037C MSN2 SGDID:S0004640, Chr XIII from 346516-344402, reverse complement, Verified ORF	YMR037C	0	-100		YPR148C YPR148C SGDID:S0006352, Chr XVI from 828136-826829, reverse complement, Uncharacterized ORF	YPR148C	0	-100
YMR096W SNZ1 SGDID:S0004702, Chr XIII from 458407-459300, Verified ORF	YMR096W	0	-100		YPR152C YPR152C SGDID:S0006356, Chr XVI from 833454-832057, reverse complement, Uncharacterized ORF	YPR152C	0	-100
YMR144W YMR144W SGDID:S0004752, Chr XIII from 553361-554389, Uncharacterized ORF	YMR144W	0	-100		YPR174C YPR174C SGDID:S0006378, Chr XVI from 888704-888039, reverse complement, Uncharacterized ORF	YPR174C	0	-100
YMR145C NDE1 SGDID:S0004753, Chr XIII from 556474-554792, reverse complement, Verified ORF	YMR145C	0	-100		YPR179C HDA3 SGDID:S0006383, Chr XVI from 895760-893793, reverse complement, Verified ORF	YPR179C	0	-100
YMR164C MSS11 SGDID:S0004774, Chr XIII from 589549-587273, reverse complement, Verified ORF	YMR164C	0	-100		YAL064W YAL064W SGDID:S0000060, Chr I from 21526-21852, Uncharacterized ORF	YAL064W	-100	?
YMR191W SPG5 SGDID:S0004803, Chr XIII from 645655-646776, Uncharacterized ORF	YMR191W	0	-100		YAR031W PRM9 SGDID:S0000078, Chr I from 186830-187726, Verified ORF	YAR031W	-100	?
YMR234W RNH1 SGDID:S0004847, Chr XIII from 740265-741311, Verified ORF	YMR234W	0	-100		YAR071W PHO11 SGDID:S0000094, Chr I from 225451-226854, Verified ORF	YAR071W	-100	?
YMR257C PET111 SGDID:S0004870, Chr XIII from 782030-779628, reverse complement, Verified ORF	YMR257C	0	-100		YBR008C FLR1 SGDID:S0000212, Chr II from 254210-252564, reverse complement, Verified ORF	YBR008C	-100	?
YMR259C YMR259C SGDID:S0004872, Chr XIII from 788882-784620, reverse complement, Uncharacterized ORF	YMR259C	0	-100		YBR092C PHO3 SGDID:S0000296, Chr II from 429095-427692, reverse complement, Verified ORF	YBR092C	-100	?
YMR268C PRP24 SGDID:S0004881, Chr XIII from 804221-802887, reverse complement, Verified ORF	YMR268C	0	-100		YBR093C PHO5 SGDID:S0000297, Chr II from 430945-429542, reverse complement, Verified ORF	YBR093C	-100	?
YNL031C HHT2 SGDID:S0004976, Chr XIV from 576049-575639, reverse complement, Verified ORF	YNL031C	0	-100		YDL024C DIA3 SGDID:S0002182, Chr IV from 409854-408448, reverse complement, Verified ORF	YDL024C	-100	?
YNL047C SLM2 SGDID:S0004992, Chr XIV from 541880-539910, reverse complement, Uncharacterized ORF	YNL047C	0	-100		YGR146C-A YGR146C-A SGDID:S0028638, Chr VII from 785442-785281, reverse complement, Uncharacterized ORF	YGR146C-A	-100	?
YNL087W TCB2 SGDID:S0005031, Chr XIV from 462411-465947, Verified ORF	YNL087W	0	-100		YHL047C ARN2 SGDID:S0001039, Chr VIII from 10211-8298, reverse complement, Verified ORF	YHL047C	-100	?
YNL091W NST1 SGDID:S0005035, Chr XIV from 452408-456130, Verified ORF	YNL091W	0	-100		YHL048W COS8 SGDID:S0001040, Chr VIII from 6400-7545, Verified ORF	YHL048W	-100	?
YNL093W YPT53 SGDID:S0005037, Chr XIV from 449868-450530, Verified ORF	YNL093W	0	-100		YHR007C-A YHR007C-A SGDID:S0028830, Chr VIII from 122759-122544, reverse complement, Uncharacterized ORF	YHR007C-A	-100	?
YNL106C INP52 SGDID:S0005050, Chr XIV from 424495-420944, reverse complement, Verified ORF	YNL106C	0	-100		YHR054C YHR054C SGDID:S0001096, Chr VIII from 214250-213186, reverse complement, Uncharacterized ORF	YHR054C	-100	?
YNL118C DCP2 SGDID:S0005062, Chr XIV from 405564-402652, reverse complement, Verified ORF	YNL118C	0	-100		YHR213W-A YHR213W-A SGDID:S0028651, Chr VIII from 540548-540781, Uncharacterized ORF	YHR213W-A	-100	?
YNL159C ASI2 SGDID:S0005103, Chr XIV from 339347-338478, reverse complement, Verified ORF	YNL159C	0	-100		YHR215W PHO12 SGDID:S0001258, Chr VIII from 552098-553501, Verified ORF	YHR215W	-100	?
YNL172W APC1 SGDID:S0005116, Chr XIV from 310636-315882, Verified ORF	YNL172W	0	-100		YIR028W DAL4 SGDID:S0001467, Chr IX from 408465-410372, Verified ORF	YIR028W	-100	?
YNL173C MDG1 SGDID:S0005117, Chr XIV from 310057-308957, reverse complement, Verified ORF	YNL173C	0	-100		YKL215C YKL215C SGDID:S0001698, Chr XI from 30688-26828, reverse complement, Uncharacterized ORF	YKL215C	-100	?
YNL183C NPR1 SGDID:S0005127, Chr XIV from 295509-293137, reverse complement, Verified ORF	YNL183C	0	-100		YKL220C FRE2 SGDID:S0001703, Chr XI from 11227-9092, reverse complement, Verified ORF	YKL220C	-100	?
YNL225C CNM67 SGDID:S0005169, Chr XIV from 224468-222723, reverse complement, Verified ORF	YNL225C	0	-100		YKR103W NFT1 SGDID:S0001811, Chr XI from 652718-656374, Verified ORF	YKR103W	-100	?
YNL257C SIP3 SGDID:S0005201, Chr XIV from 164319-160630, reverse complement, Verified ORF	YNL257C	0	-100		YLL051C FRE6 SGDID:S0003974, Chr XII from 39470-37332, reverse complement, Verified ORF	YLL051C	-100	?
YNL308C KRI1 SGDID:S0005252, Chr XIV from 55896-54121, reverse complement, Verified ORF	YNL308C	0	-100		YLL058W YLL058W SGDID:S0003981, Chr XII from 23569-25296, Uncharacterized ORF	YLL058W	-100	?
YOL063C HUS1 SGDID:S0005424, Chr XV from 210264-207391, reverse complement, Uncharacterized ORF	YOL063C	0	-100		YML058W-A HUG1 SGDID:S0007472, Chr XIII from 158760-158966, Verified ORF	YML058W-A	-100	?
YOL082W ATG19 SGDID:S0005442, Chr XV from 168726-169973, Verified ORF	YOL082W	0	-100		YMR316W DIA1 SGDID:S0004935, Chr XIII from 904823-905833, Verified ORF	YMR316W	-100	?
YOL105C WSC3 SGDID:S0005465, Chr XV from 115807-114137, reverse complement, Verified ORF	YOL105C	0	-100		YNL146C-A YNL146C-A SGDID:S0028851, Chr XIV from 351580-351386, reverse complement, Uncharacterized ORF	YNL146C-A	-100	?
YOL125W YOL125W SGDID:S0005485, Chr XV from 83833-85263, Uncharacterized ORF	YOL125W	0	-100		YNR055C HOL1 SGDID:S0005338, Chr XIV from 730185-728425, reverse complement, Verified ORF	YNR055C	-100	?
YOL130W ALR1 SGDID:S0005490, Chr XV from 74399-76978, Verified ORF	YOL130W	0	-100		YOL162W YOL162W SGDID:S0005522, Chr XV from 10118-10765, Uncharacterized ORF	YOL162W	-100	?
YOL135C MED7 SGDID:S0005495, Chr XV from 70043-69375, reverse complement, Verified ORF	YOL135C	0	-100		YOR072W-B YOR072W-B SGDID:S0028516, Chr XV from 464470-464631, Uncharacterized ORF	YOR072W-B	-100	?
YOR005C DNL4 SGDID:S0005531, Chr XV from 337343-334509, reverse complement, Verified ORF	YOR005C	0	-100		YOR268C YOR268C SGDID:S0005794, Chr XV from 825929-825531, reverse complement, Uncharacterized ORF	YOR268C	-100	?
YOR008C SLG1 SGDID:S0005534, Chr XV from 342414-341278, reverse complement, Verified ORF	YOR008C	0	-100		YOR381W FRE3 SGDID:S0005908, Chr XV from 1055541-1057676, Verified ORF	YOR381W	-100	?
YOR107W RGS2 SGDID:S0005633, Chr XV from 521353-522282, Verified ORF	YOR107W	0	-100		YPL056C YPL056C SGDID:S0005977, Chr XVI from 453732-453427, reverse complement, Uncharacterized ORF	YPL056C	-100	?
YOR114W YOR114W SGDID:S0005640, Chr XV from 537570-538454, Uncharacterized ORF	YOR114W	0	-100		YPL119C-A YPL119C-A SGDID:S0028859, Chr XVI from 324286-324023, reverse complement, Uncharacterized ORF	YPL119C-A	-100	?
YOR118W YOR118W SGDID:S0005644, Chr XV from 546857-548560, Uncharacterized ORF	YOR118W	0	-100
YOR149C SMP3 SGDID:S0005675, Chr XV from 611388-609838, reverse complement, Verified ORF	YOR149C	0	-100
YOR162C YRR1 SGDID:S0005688, Chr XV from 641992-639560, reverse complement, Verified ORF	YOR162C	0	-100
YOR166C YOR166C SGDID:S0005692, Chr XV from 648502-647126, reverse complement, Uncharacterized ORF	YOR166C	0	-100
YOR173W DCS2 SGDID:S0005699, Chr XV from 657132-658325, Verified ORF	YOR173W	0	-100
YOR193W PEX27 SGDID:S0005719, Chr XV from 710446-711576, Verified ORF	YOR193W	0	-100
YOR205C FMP38 SGDID:S0005731, Chr XV from 727234-725564, reverse complement, Uncharacterized ORF	YOR205C	0	-100
YOR208W PTP2 SGDID:S0005734, Chr XV from 733925-736177, Verified ORF	YOR208W	0	-100
YOR220W YOR220W SGDID:S0005746, Chr XV from 755328-756125, Uncharacterized ORF	YOR220W	0	-100
YOR226C ISU2 SGDID:S0005752, Chr XV from 762084-761614, reverse complement, Verified ORF	YOR226C	0	-100
YOR233W KIN4 SGDID:S0005759, Chr XV from 775846-778248, Verified ORF	YOR233W	0	-100
YOR236W DFR1 SGDID:S0005762, Chr XV from 780906-781541, Verified ORF	YOR236W	0	-100
YOR239W ABP140 SGDID:S0005765, Chr XV from 784857-785687,785689-786744, Verified ORF	YOR239W	0	-100
YOR255W OSW1 SGDID:S0005781, Chr XV from 807270-808106, Uncharacterized ORF	YOR255W	0	-100
YOR278W HEM4 SGDID:S0005804, Chr XV from 842814-843641, Verified ORF	YOR278W	0	-100
YOR287C YOR287C SGDID:S0005813, Chr XV from 851836-850934, reverse complement, Uncharacterized ORF	YOR287C	0	-100
YOR296W YOR296W SGDID:S0005822, Chr XV from 870199-874068, Uncharacterized ORF	YOR296W	0	-100
YOR308C SNU66 SGDID:S0005835, Chr XV from 896382-894619, reverse complement, Verified ORF	YOR308C	0	-100
YOR354C MSC6 SGDID:S0005881, Chr XV from 1003220-1001142, reverse complement, Verified ORF	YOR354C	0	-100
YOR360C PDE2 SGDID:S0005887, Chr XV from 1014817-1013237, reverse complement, Verified ORF	YOR360C	0	-100
YOR368W RAD17 SGDID:S0005895, Chr XV from 1026839-1028044, Verified ORF	YOR368W	0	-100
YPL007C TFC8 SGDID:S0005928, Chr XVI from 543845-542079, reverse complement, Verified ORF	YPL007C	0	-100
YPL033C YPL033C SGDID:S0005954, Chr XVI from 488205-487360, reverse complement, Uncharacterized ORF	YPL033C	0	-100
YPL034W YPL034W SGDID:S0005955, Chr XVI from 486710-487207, Uncharacterized ORF	YPL034W	0	-100
YPL038W MET31 SGDID:S0005959, Chr XVI from 480532-481065, Verified ORF	YPL038W	0	-100
YPL039W YPL039W SGDID:S0005960, Chr XVI from 479222-480172, Uncharacterized ORF	YPL039W	0	-100
YPL042C SSN3 SGDID:S0005963, Chr XVI from 474704-473037, reverse complement, Verified ORF	YPL042C	0	-100
YPL109C YPL109C SGDID:S0006030, Chr XVI from 347388-345596,345443-345263, reverse complement, Uncharacterized ORF	YPL109C	0	-100
YPL124W SPC29 SGDID:S0006045, Chr XVI from 316754-317515, Verified ORF	YPL124W	0	-100
YPL151C PRP46 SGDID:S0006072, Chr XVI from 267534-266179, reverse complement, Verified ORF	YPL151C	0	-100
YPL174C NIP100 SGDID:S0006095, Chr XVI from 222772-220166, reverse complement, Verified ORF	YPL174C	0	-100
YPL242C IQG1 SGDID:S0006163, Chr XVI from 95109-90622, reverse complement, Verified ORF	YPL242C	0	-100
YPL243W SRP68 SGDID:S0006164, Chr XVI from 88517-90316, Verified ORF	YPL243W	0	-100
YPL250C ICY2 SGDID:S0006171, Chr XVI from 74719-74309, reverse complement, Uncharacterized ORF	YPL250C	0	-100
YPL255W BBP1 SGDID:S0006176, Chr XVI from 67725-68882, Verified ORF	YPL255W	0	-100
YPL270W MDL2 SGDID:S0006191, Chr XVI from 30482-32803, Verified ORF	YPL270W	0	-100
YPR013C YPR013C SGDID:S0006217, Chr XVI from 585582-584629, reverse complement, Uncharacterized ORF	YPR013C	0	-100
YPR036W-A YPR036W-A SGDID:S0028425, Chr XVI from 645947-646150, Uncharacterized ORF	YPR036W-A	0	-100
YPR051W MAK3 SGDID:S0006255, Chr XVI from 664957-665487, Verified ORF	YPR051W	0	-100
YPR057W BRR1 SGDID:S0006261, Chr XVI from 672468-673493, Verified ORF	YPR057W	0	-100
YPR089W YPR089W SGDID:S0006293, Chr XVI from 713273-715939, Uncharacterized ORF	YPR089W	0	-100
YPR141C KAR3 SGDID:S0006345, Chr XVI from 817919-815730, reverse complement, Verified ORF	YPR141C	0	-100
YPR144C NOC4 SGDID:S0006348, Chr XVI from 821419-819761, reverse complement, Verified ORF	YPR144C	0	-100
YPR148C YPR148C SGDID:S0006352, Chr XVI from 828136-826829, reverse complement, Uncharacterized ORF	YPR148C	0	-100
YPR152C YPR152C SGDID:S0006356, Chr XVI from 833454-832057, reverse complement, Uncharacterized ORF	YPR152C	0	-100
YPR174C YPR174C SGDID:S0006378, Chr XVI from 888704-888039, reverse complement, Uncharacterized ORF	YPR174C	0	-100
YPR179C HDA3 SGDID:S0006383, Chr XVI from 895760-893793, reverse complement, Verified ORF	YPR179C	0	-100
YAL064W YAL064W SGDID:S0000060, Chr I from 21526-21852, Uncharacterized ORF	YAL064W	-100	?
YAR031W PRM9 SGDID:S0000078, Chr I from 186830-187726, Verified ORF	YAR031W	-100	?
YAR071W PHO11 SGDID:S0000094, Chr I from 225451-226854, Verified ORF	YAR071W	-100	?
YBR008C FLR1 SGDID:S0000212, Chr II from 254210-252564, reverse complement, Verified ORF	YBR008C	-100	?
YBR092C PHO3 SGDID:S0000296, Chr II from 429095-427692, reverse complement, Verified ORF	YBR092C	-100	?
YBR093C PHO5 SGDID:S0000297, Chr II from 430945-429542, reverse complement, Verified ORF	YBR093C	-100	?
YDL024C DIA3 SGDID:S0002182, Chr IV from 409854-408448, reverse complement, Verified ORF	YDL024C	-100	?
YGR146C-A YGR146C-A SGDID:S0028638, Chr VII from 785442-785281, reverse complement, Uncharacterized ORF	YGR146C-A	-100	?
YHL047C ARN2 SGDID:S0001039, Chr VIII from 10211-8298, reverse complement, Verified ORF	YHL047C	-100	?
YHL048W COS8 SGDID:S0001040, Chr VIII from 6400-7545, Verified ORF	YHL048W	-100	?
YHR007C-A YHR007C-A SGDID:S0028830, Chr VIII from 122759-122544, reverse complement, Uncharacterized ORF	YHR007C-A	-100	?
YHR054C YHR054C SGDID:S0001096, Chr VIII from 214250-213186, reverse complement, Uncharacterized ORF	YHR054C	-100	?
YHR213W-A YHR213W-A SGDID:S0028651, Chr VIII from 540548-540781, Uncharacterized ORF	YHR213W-A	-100	?
YHR215W PHO12 SGDID:S0001258, Chr VIII from 552098-553501, Verified ORF	YHR215W	-100	?
YIR028W DAL4 SGDID:S0001467, Chr IX from 408465-410372, Verified ORF	YIR028W	-100	?
YKL215C YKL215C SGDID:S0001698, Chr XI from 30688-26828, reverse complement, Uncharacterized ORF	YKL215C	-100	?
YKL220C FRE2 SGDID:S0001703, Chr XI from 11227-9092, reverse complement, Verified ORF	YKL220C	-100	?
YKR103W NFT1 SGDID:S0001811, Chr XI from 652718-656374, Verified ORF	YKR103W	-100	?
YLL051C FRE6 SGDID:S0003974, Chr XII from 39470-37332, reverse complement, Verified ORF	YLL051C	-100	?
YLL058W YLL058W SGDID:S0003981, Chr XII from 23569-25296, Uncharacterized ORF	YLL058W	-100	?
YML058W-A HUG1 SGDID:S0007472, Chr XIII from 158760-158966, Verified ORF	YML058W-A	-100	?
YMR316W DIA1 SGDID:S0004935, Chr XIII from 904823-905833, Verified ORF	YMR316W	-100	?
YNL146C-A YNL146C-A SGDID:S0028851, Chr XIV from 351580-351386, reverse complement, Uncharacterized ORF	YNL146C-A	-100	?
YNR055C HOL1 SGDID:S0005338, Chr XIV from 730185-728425, reverse complement, Verified ORF	YNR055C	-100	?
YOL162W YOL162W SGDID:S0005522, Chr XV from 10118-10765, Uncharacterized ORF	YOL162W	-100	?
YOR072W-B YOR072W-B SGDID:S0028516, Chr XV from 464470-464631, Uncharacterized ORF	YOR072W-B	-100	?
YOR268C YOR268C SGDID:S0005794, Chr XV from 825929-825531, reverse complement, Uncharacterized ORF	YOR268C	-100	?
YOR381W FRE3 SGDID:S0005908, Chr XV from 1055541-1057676, Verified ORF	YOR381W	-100	?
YPL056C YPL056C SGDID:S0005977, Chr XVI from 453732-453427, reverse complement, Uncharacterized ORF	YPL056C	-100	?
YPL119C-A YPL119C-A SGDID:S0028859, Chr XVI from 324286-324023, reverse complement, Uncharacterized ORF	YPL119C-A	-100	?
YHR061C GIC1 SGDID:S0001103, Chr VIII from 222479-221535, reverse complement, Verified ORF	YHR061C	-100	12.4304
YER075C PTP3 SGDID:S0000877, Chr V from 311195-308409, reverse complement, Verified ORF	YER075C	-100	11.4471
YHL009C YAP3 SGDID:S0001001, Chr VIII from 85055-84063, reverse complement, Verified ORF	YHL009C	-100	11.1647
YNR006W VPS27 SGDID:S0005289, Chr XIV from 636986-638854, Verified ORF	YNR006W	-100	9.25688
YKL072W STB6 SGDID:S0001555, Chr XI from 299227-301527, Verified ORF	YKL072W	-100	6.84358
YHL029C YHL029C SGDID:S0001021, Chr VIII from 47966-45927, reverse complement, Uncharacterized ORF	YHL029C	-100	5.61099
YLR117C CLF1 SGDID:S0004107, Chr XII from 384535-382472, reverse complement, Verified ORF	YLR117C	-100	5.59668
YMR053C STB2 SGDID:S0004657, Chr XIII from 382897-380345, reverse complement, Verified ORF	YMR053C	-100	5.59229
YGR212W SLI1 SGDID:S0003444, Chr VII from 917045-918451, Uncharacterized ORF	YGR212W	-100	5.2271
YLR446W YLR446W SGDID:S0004438, Chr XII from 1025210-1026511, Uncharacterized ORF	YLR446W	-100	4.63429
YNL050C YNL050C SGDID:S0004995, Chr XIV from 534981-534965,534873-534078, reverse complement, Uncharacterized ORF	YNL050C	-100	4.43732
YJR019C TES1 SGDID:S0003780, Chr X from 468195-467146, reverse complement, Verified ORF	YJR019C	-100	4.33608
YOL013C HRD1 SGDID:S0005373, Chr XV from 303035-301380, reverse complement, Verified ORF	YOL013C	-100	4.13998
YGL104C VPS73 SGDID:S0003072, Chr VII from 310176-308716, reverse complement, Verified ORF	YGL104C	-100	3.98197
YOL068C HST1 SGDID:S0005429, Chr XV from 201878-200367, reverse complement, Verified ORF	YOL068C	-100	3.72215
YCL045C YCL045C SGDID:S0000550, Chr III from 46905-44623, reverse complement, Uncharacterized ORF	YCL045C	-100	3.12277
YPL085W SEC16 SGDID:S0006006, Chr XVI from 387064-393651, Verified ORF	YPL085W	-100	2.97761
YIL101C XBP1 SGDID:S0001363, Chr IX from 177247-175304, reverse complement, Verified ORF	YIL101C	-100	2.93289
YHR004C NEM1 SGDID:S0001046, Chr VIII from 113088-111748, reverse complement, Verified ORF	YHR004C	-100	2.81544
YDL238C GUD1 SGDID:S0002397, Chr IV from 30454-28985, reverse complement, Uncharacterized ORF	YDL238C	-100	2.61697
YGR048W UFD1 SGDID:S0003280, Chr VII from 589830-590915, Verified ORF	YGR048W	-100	2.54085
YJL208C NUC1 SGDID:S0003744, Chr X from 41183-40194, reverse complement, Verified ORF	YJL208C	-100	2.46888
YMR160W YMR160W SGDID:S0004770, Chr XIII from 575065-577515, Uncharacterized ORF	YMR160W	-100	2.38419
YER051W YER051W SGDID:S0000853, Chr V from 254655-256133, Uncharacterized ORF	YER051W	-100	2.33966
YIL147C SLN1 SGDID:S0001409, Chr IX from 73453-69791, reverse complement, Verified ORF	YIL147C	-100	2.18778
YLR118C YLR118C SGDID:S0004108, Chr XII from 385409-384726, reverse complement, Uncharacterized ORF	YLR118C	-100	2.06435
YML082W YML082W SGDID:S0004547, Chr XIII from 101862-103811, Uncharacterized ORF	YML082W	-100	1.93336
YBR241C YBR241C SGDID:S0000445, Chr II from 704050-702584, reverse complement, Uncharacterized ORF	YBR241C	-100	1.72715
YNL103W MET4 SGDID:S0005047, Chr XIV from 427735-429753, Verified ORF	YNL103W	-100	1.69232
YJR130C STR2 SGDID:S0003891, Chr X from 667052-665133, reverse complement, Verified ORF	YJR130C	-100	1.64917
YER182W FMP10 SGDID:S0000984, Chr V from 552520-553254, Uncharacterized ORF	YER182W	-100	1.60505
YGL095C VPS45 SGDID:S0003063, Chr VII from 330610-328877, reverse complement, Verified ORF	YGL095C	-100	1.5805
YOR273C TPO4 SGDID:S0005799, Chr XV from 836428-834449, reverse complement, Verified ORF	YOR273C	-100	1.57948
YLR451W LEU3 SGDID:S0004443, Chr XII from 1036089-1038749, Verified ORF	YLR451W	-100	1.57424
YER158C YER158C SGDID:S0000960, Chr V from 490573-488852, reverse complement, Uncharacterized ORF	YER158C	-100	1.53018
YHR164C DNA2 SGDID:S0001207, Chr VIII from 429179-424611, reverse complement, Verified ORF	YHR164C	-100	1.51087
YGL142C GPI10 SGDID:S0003110, Chr VII from 238124-236274, reverse complement, Verified ORF	YGL142C	-100	1.39115
YMR097C MTG1 SGDID:S0004703, Chr XIII from 460526-459423, reverse complement, Verified ORF	YMR097C	-100	1.3906
YLR127C APC2 SGDID:S0004117, Chr XII from 398320-395759, reverse complement, Verified ORF	YLR127C	-100	1.32951
YDR358W GGA1 SGDID:S0002766, Chr IV from 1190050-1191723, Verified ORF	YDR358W	-100	1.29273
YOR181W LAS17 SGDID:S0005707, Chr XV from 675939-677840, Verified ORF	YOR181W	-100	1.28067
YGL221C NIF3 SGDID:S0003189, Chr VII from 82291-81425, reverse complement, Verified ORF	YGL221C	-100	1.26094
YPL158C YPL158C SGDID:S0006079, Chr XVI from 254309-252033, reverse complement, Uncharacterized ORF	YPL158C	-100	1.22728
YOL129W VPS68 SGDID:S0005489, Chr XV from 77559-78113, Verified ORF	YOL129W	-100	1.19699
YLR191W PEX13 SGDID:S0004181, Chr XII from 537274-538434, Verified ORF	YLR191W	-100	1.13525
YOR112W YOR112W SGDID:S0005638, Chr XV from 531508-533793, Uncharacterized ORF	YOR112W	-100	1.11706
YJR102C VPS25 SGDID:S0003863, Chr X from 619679-619071, reverse complement, Verified ORF	YJR102C	-100	1.10083
YNL165W YNL165W SGDID:S0005109, Chr XIV from 323832-325052, Uncharacterized ORF	YNL165W	-100	0.973454
YDL027C YDL027C SGDID:S0002185, Chr IV from 404954-403692, reverse complement, Uncharacterized ORF	YDL027C	-100	0.91018
YMR147W YMR147W SGDID:S0004755, Chr XIII from 559198-559869, Uncharacterized ORF	YMR147W	-100	0.864741
YER049W YER049W SGDID:S0000851, Chr V from 251727-253661, Uncharacterized ORF	YER049W	-100	0.836582
YGR010W NMA2 SGDID:S0003242, Chr VII from 511549-512736, Verified ORF	YGR010W	-100	0.783864
YMR207C HFA1 SGDID:S0004820, Chr XIII from 683563-677192, reverse complement, Verified ORF	YMR207C	-100	0.759847
YKR082W NUP133 SGDID:S0001790, Chr XI from 592467-595940, Verified ORF	YKR082W	-100	0.757702
YNL219C ALG9 SGDID:S0005163, Chr XIV from 237662-235995, reverse complement, Verified ORF	YNL219C	-100	0.703198
YML091C RPM2 SGDID:S0004556, Chr XIII from 90731-87123, reverse complement, Verified ORF	YML091C	-100	0.698586
YDR111C ALT2 SGDID:S0002518, Chr IV from 679759-678236, reverse complement, Uncharacterized ORF	YDR111C	-100	0.696972
YJL149W YJL149W SGDID:S0003685, Chr X from 137297-139288, Uncharacterized ORF	YJL149W	-100	0.695167
YHL032C GUT1 SGDID:S0001024, Chr VIII from 38506-36377, reverse complement, Verified ORF	YHL032C	-100	0.692883
YLR017W MEU1 SGDID:S0004007, Chr XII from 177607-178620, Verified ORF	YLR017W	-100	0.668981
YOL107W YOL107W SGDID:S0005467, Chr XV from 112101-113129, Uncharacterized ORF	YOL107W	-100	0.600798
YMR110C YMR110C SGDID:S0004716, Chr XIII from 491991-490393, reverse complement, Uncharacterized ORF	YMR110C	-100	0.593271
YJR100C YJR100C SGDID:S0003861, Chr X from 617248-616265, reverse complement, Uncharacterized ORF	YJR100C	-100	0.579014
YDL044C MTF2 SGDID:S0002202, Chr IV from 375286-373964, reverse complement, Verified ORF	YDL044C	-100	0.524568
YOR037W CYC2 SGDID:S0005563, Chr XV from 401554-402654, Verified ORF	YOR037W	-100	0.515127
YLR387C REH1 SGDID:S0004379, Chr XII from 897672-896374, reverse complement, Verified ORF	YLR387C	-100	0.483442
YMR293C YMR293C SGDID:S0004907, Chr XIII from 856792-855398, reverse complement, Uncharacterized ORF	YMR293C	-100	0.453664
YKR080W MTD1 SGDID:S0001788, Chr XI from 590037-590999, Verified ORF	YKR080W	-100	0.450748
YKL010C UFD4 SGDID:S0001493, Chr XI from 425518-421067, reverse complement, Verified ORF	YKL010C	-100	0.428176
YMR001C CDC5 SGDID:S0004603, Chr XIII from 271136-269019, reverse complement, Verified ORF	YMR001C	-100	0.396936
YDR434W GPI17 SGDID:S0002842, Chr IV from 1331227-1332831, Verified ORF	YDR434W	-100	0.369585
YDR093W DNF2 SGDID:S0002500, Chr IV from 631277-636115, Verified ORF	YDR093W	-100	0.369405
YLR207W HRD3 SGDID:S0004197, Chr XII from 556790-559291, Verified ORF	YLR207W	-100	0.360466
YPL119C DBP1 SGDID:S0006040, Chr XVI from 326263-324410, reverse complement, Verified ORF	YPL119C	-100	0.351131
YDR362C TFC6 SGDID:S0002770, Chr IV from 1198687-1196669, reverse complement, Verified ORF	YDR362C	-100	0.332856
YGL207W SPT16 SGDID:S0003175, Chr VII from 98973-102080, Verified ORF	YGL207W	-100	0.320439
YDR175C RSM24 SGDID:S0002582, Chr IV from 814147-813188, reverse complement, Verified ORF	YDR175C	-100	0.314006
YNL009W IDP3 SGDID:S0004954, Chr XIV from 614820-616082, Verified ORF	YNL009W	-100	0.310601
YEL042W GDA1 SGDID:S0000768, Chr V from 73771-75327, Verified ORF	YEL042W	-100	0.30859
YPR168W NUT2 SGDID:S0006372, Chr XVI from 878072-878545, Verified ORF	YPR168W	-100	0.306804
YBR276C PPS1 SGDID:S0000480, Chr II from 760039-757616, reverse complement, Verified ORF	YBR276C	-100	0.302102
YFR038W YFR038W SGDID:S0001934, Chr VI from 229367-231928, Uncharacterized ORF	YFR038W	-100	0.298255
YER166W DNF1 SGDID:S0000968, Chr V from 512739-517454, Verified ORF	YER166W	-100	0.293083
YNL020C ARK1 SGDID:S0004965, Chr XIV from 597538-595622, reverse complement, Verified ORF	YNL020C	-100	0.290734
YMR264W CUE1 SGDID:S0004877, Chr XIII from 795804-796415, Verified ORF	YMR264W	-100	0.279333
YOL021C DIS3 SGDID:S0005381, Chr XV from 285426-282421, reverse complement, Verified ORF	YOL021C	-100	0.259139
YIL073C SPO22 SGDID:S0001335, Chr IX from 225951-225897,225806-222934, reverse complement, Verified ORF	YIL073C	-100	0.246689
YHR072W ERG7 SGDID:S0001114, Chr VIII from 239099-241294, Verified ORF	YHR072W	-100	0.23228
YNL275W YNL275W SGDID:S0005219, Chr XIV from 119266-120996, Uncharacterized ORF	YNL275W	-100	0.214284
YMR304W UBP15 SGDID:S0004920, Chr XIII from 874986-878678, Verified ORF	YMR304W	-100	0.209913
YJR049C UTR1 SGDID:S0003810, Chr X from 528390-526798, reverse complement, Verified ORF	YJR049C	-100	0.209327
YHR108W GGA2 SGDID:S0001150, Chr VIII from 328305-330062, Verified ORF	YHR108W	-100	0.208402
YPL245W YPL245W SGDID:S0006166, Chr XVI from 85586-86950, Uncharacterized ORF	YPL245W	-100	0.203749
YOR160W MTR10 SGDID:S0005686, Chr XV from 633839-636757, Verified ORF	YOR160W	-100	0.197958
YDR009W GAL3 SGDID:S0002416, Chr IV from 463431-464993, Verified ORF	YDR009W	-100	0.182824
YDR045C RPC11 SGDID:S0002452, Chr IV from 548307-547975, reverse complement, Verified ORF	YDR045C	-100	0.1574
YDL178W DLD2 SGDID:S0002337, Chr IV from 139523-141115, Verified ORF	YDL178W	-100	0.145915
YDR051C YDR051C SGDID:S0002458, Chr IV from 558057-557053, reverse complement, Uncharacterized ORF	YDR051C	-100	0.141219
YPL236C YPL236C SGDID:S0006157, Chr XVI from 102702-101608, reverse complement, Uncharacterized ORF	YPL236C	-100	0.139119
YEL062W NPR2 SGDID:S0000788, Chr V from 34407-36254, Verified ORF	YEL062W	-100	0.138739
YLR330W CHS5 SGDID:S0004322, Chr XII from 787664-789679, Verified ORF	YLR330W	-100	0.135904
YJL129C TRK1 SGDID:S0003665, Chr X from 177224-173517, reverse complement, Verified ORF	YJL129C	-100	0.134102
YGL077C HNM1 SGDID:S0003045, Chr VII from 363919-362228, reverse complement, Verified ORF	YGL077C	-100	0.127932
YHR176W FMO1 SGDID:S0001219, Chr VIII from 454228-455526, Verified ORF	YHR176W	-100	0.123277
YLR328W NMA1 SGDID:S0004320, Chr XII from 784913-786118, Verified ORF	YLR328W	-100	0.121701
YPL049C DIG1 SGDID:S0005970, Chr XVI from 463836-462478, reverse complement, Verified ORF	YPL049C	-100	0.121404
YPL249C GYP5 SGDID:S0006170, Chr XVI from 79353-76669, reverse complement, Verified ORF	YPL249C	-100	0.120352
YDL215C GDH2 SGDID:S0002374, Chr IV from 73919-70641, reverse complement, Verified ORF	YDL215C	-100	0.114077
YLR422W YLR422W SGDID:S0004414, Chr XII from 965893-971691, Uncharacterized ORF	YLR422W	-100	0.112227
YGR143W SKN1 SGDID:S0003375, Chr VII from 775198-777513, Verified ORF	YGR143W	-100	0.111824
YBR018C GAL7 SGDID:S0000222, Chr II from 275527-274427, reverse complement, Verified ORF	YBR018C	-100	0.109023
YBL076C ILS1 SGDID:S0000172, Chr II from 84259-81041, reverse complement, Verified ORF	YBL076C	-100	0.105681
YDR485C VPS72 SGDID:S0002893, Chr IV from 1427197-1424810, reverse complement, Verified ORF	YDR485C	-100	0.105615
YGR261C APL6 SGDID:S0003493, Chr VII from 1016756-1014327, reverse complement, Verified ORF	YGR261C	-100	0.102202
YHR084W STE12 SGDID:S0001126, Chr VIII from 274175-276241, Verified ORF	YHR084W	-100	0.0984877
YNL320W YNL320W SGDID:S0005264, Chr XIV from 37699-38553, Uncharacterized ORF	YNL320W	-100	0.0954483
YMR176W ECM5 SGDID:S0004788, Chr XIII from 611739-615974, Verified ORF	YMR176W	-100	0.0942993
YGR017W YGR017W SGDID:S0003249, Chr VII from 523791-524684, Uncharacterized ORF	YGR017W	-100	0.0924104
YGL212W VAM7 SGDID:S0003180, Chr VII from 91436-92386, Verified ORF	YGL212W	-100	0.0918532
YNR016C ACC1 SGDID:S0005299, Chr XIV from 661374-654673, reverse complement, Verified ORF	YNR016C	-100	0.0862398
YMR128W ECM16 SGDID:S0004735, Chr XIII from 523695-527498, Verified ORF	YMR128W	-100	0.0862389
YJR101W RSM26 SGDID:S0003862, Chr X from 618148-618948, Verified ORF	YJR101W	-100	0.0836674
YBL102W SFT2 SGDID:S0000198, Chr II from 24098-24745, Verified ORF	YBL102W	-100	0.0794564
YKR050W TRK2 SGDID:S0001758, Chr XI from 527457-530126, Verified ORF	YKR050W	-100	0.077013
YKL129C MYO3 SGDID:S0001612, Chr XI from 200165-196350, reverse complement, Verified ORF	YKL129C	-100	0.0768951
YPR166C MRP2 SGDID:S0006370, Chr XVI from 876625-876278, reverse complement, Verified ORF	YPR166C	-100	0.0758846
YOR172W YRM1 SGDID:S0005698, Chr XV from 654210-656570, Verified ORF	YOR172W	-100	0.0672164
YDR410C STE14 SGDID:S0002818, Chr IV from 1293081-1292362, reverse complement, Verified ORF	YDR410C	-100	0.0566792
YPR100W MRPL51 SGDID:S0006304, Chr XVI from 729789-730211, Verified ORF	YPR100W	-100	0.0520556
YLR249W YEF3 SGDID:S0004239, Chr XII from 636782-639916, Verified ORF	YLR249W	-100	0.0490395
YJR076C CDC11 SGDID:S0003837, Chr X from 576515-575268, reverse complement, Verified ORF	YJR076C	-100	0.047989
YML121W GTR1 SGDID:S0004590, Chr XIII from 26930-27862, Verified ORF	YML121W	-100	0.0454161
YLR028C ADE16 SGDID:S0004018, Chr XII from 201316-199541, reverse complement, Verified ORF	YLR028C	-100	0.04436
YIL124W AYR1 SGDID:S0001386, Chr IX from 126204-127097, Verified ORF	YIL124W	-100	0.0409419
YBL004W UTP20 SGDID:S0000100, Chr II from 227639-235120, Uncharacterized ORF	YBL004W	-100	0.0404513
YPR122W AXL1 SGDID:S0006326, Chr XVI from 782041-785667, Verified ORF	YPR122W	-100	0.0401938
YBR021W FUR4 SGDID:S0000225, Chr II from 281443-283344, Verified ORF	YBR021W	-100	0.0379866
YDR291W YDR291W SGDID:S0002699, Chr IV from 1039722-1042955, Uncharacterized ORF	YDR291W	-100	0.0378677
YOR204W DED1 SGDID:S0005730, Chr XV from 722911-724725, Verified ORF	YOR204W	-100	0.0333213
YLR308W CDA2 SGDID:S0004299, Chr XII from 747939-748877, Verified ORF	YLR308W	-100	0.0302992
YJL156C SSY5 SGDID:S0003692, Chr X from 128870-126807, reverse complement, Verified ORF	YJL156C	-100	0.0279193
YGL130W CEG1 SGDID:S0003098, Chr VII from 266150-267529, Verified ORF	YGL130W	-100	0.0253503
YLR345W YLR345W SGDID:S0004337, Chr XII from 820511-822040, Uncharacterized ORF	YLR345W	-100	0.0233185
YKL210W UBA1 SGDID:S0001693, Chr XI from 39164-42238, Verified ORF	YKL210W	-100	0.0218818
YGL038C OCH1 SGDID:S0003006, Chr VII from 426810-425368, reverse complement, Verified ORF	YGL038C	-100	0.0208635
YGR270W YTA7 SGDID:S0003502, Chr VII from 1027376-1031515, Verified ORF	YGR270W	-100	0.0198885
YGR101W PCP1 SGDID:S0003333, Chr VII from 693367-694407, Verified ORF	YGR101W	-100	0.0189123
YLR203C MSS51 SGDID:S0004193, Chr XII from 551962-550652, reverse complement, Verified ORF	YLR203C	-100	0.0187148
YPL092W SSU1 SGDID:S0006013, Chr XVI from 373790-375166, Verified ORF	YPL092W	-100	0.0179388
YEL052W AFG1 SGDID:S0000778, Chr V from 56571-58100, Verified ORF	YEL052W	-100	0.0160481
YPL162C YPL162C SGDID:S0006083, Chr XVI from 244026-243205, reverse complement, Uncharacterized ORF	YPL162C	-100	0.0158305
YNL014W HEF3 SGDID:S0004959, Chr XIV from 606318-609452, Verified ORF	YNL014W	-100	0.0156108
YDR234W LYS4 SGDID:S0002642, Chr IV from 931123-933204, Verified ORF	YDR234W	-100	0.0143019
YBR020W GAL1 SGDID:S0000224, Chr II from 279021-280607, Verified ORF	YBR020W	-100	0.0136935
YGL143C MRF1 SGDID:S0003111, Chr VII from 235963-234722, reverse complement, Verified ORF	YGL143C	-100	0.0126497
YJR122W CAF17 SGDID:S0003883, Chr X from 649691-651184, Verified ORF	YJR122W	-100	0.0116132
YPL058C PDR12 SGDID:S0005979, Chr XVI from 450374-445839, reverse complement, Verified ORF	YPL058C	-100	0.0100683
YPL208W YPL208W SGDID:S0006129, Chr XVI from 157841-159592, Uncharacterized ORF	YPL208W	-100	0.00781655
YOR211C MGM1 SGDID:S0005737, Chr XV from 741632-738924, reverse complement, Verified ORF	YOR211C	-100	0.00761529
YKL029C MAE1 SGDID:S0001512, Chr XI from 384368-382359, reverse complement, Verified ORF	YKL029C	-100	0.00745107
YBR072W HSP26 SGDID:S0000276, Chr II from 382027-382671, Verified ORF	YBR072W	-100	0.00682604
YFR009W GCN20 SGDID:S0001905, Chr VI from 162482-164740, Verified ORF	YFR009W	-100	0.00676472
YDL051W LHP1 SGDID:S0002209, Chr IV from 363952-364779, Verified ORF	YDL051W	-100	0.00653362
YNL301C RPL18B SGDID:S0005245, Chr XIV from 64561-64450,64017-63569, reverse complement, Verified ORF	YNL301C	-100	0.00613988
YNL272C SEC2 SGDID:S0005216, Chr XIV from 129082-126803, reverse complement, Verified ORF	YNL272C	-100	0.00612097
YMR109W MYO5 SGDID:S0004715, Chr XIII from 486586-490245, Verified ORF	YMR109W	-100	0.00484641
YBR221C PDB1 SGDID:S0000425, Chr II from 666248-665148, reverse complement, Verified ORF	YBR221C	-100	0.0045104
YLR199C YLR199C SGDID:S0004189, Chr XII from 548771-548766,548679-547855, reverse complement, Uncharacterized ORF	YLR199C	-100	0.00450428
YLR299W ECM38 SGDID:S0004290, Chr XII from 726071-728053, Verified ORF	YLR299W	-100	0.00339921
YDR078C SHU2 SGDID:S0002485, Chr IV from 602865-602194, reverse complement, Uncharacterized ORF	YDR078C	-100	0.00274873
YDR380W ARO10 SGDID:S0002788, Chr IV from 1234208-1236115, Verified ORF	YDR380W	-100	0.00240636
YLR075W RPL10 SGDID:S0004065, Chr XII from 282928-283593, Verified ORF	YLR075W	-100	0.00198627
YGR204W ADE3 SGDID:S0003436, Chr VII from 905939-908779, Verified ORF	YGR204W	-100	0.00186526
YER036C ARB1 SGDID:S0000838, Chr V from 225198-223366, reverse complement, Uncharacterized ORF	YER036C	-100	0.00161088
YPR081C GRS2 SGDID:S0006285, Chr XVI from 703968-702112, reverse complement, Verified ORF	YPR081C	-100	0.00145101
YOR298W YOR298W SGDID:S0005824, Chr XV from 875596-877035, Uncharacterized ORF	YOR298W	-100	0.00112557
YLL007C YLL007C SGDID:S0003930, Chr XII from 136298-134301, reverse complement, Uncharacterized ORF	YLL007C	-100	0.00111569
YER019W ISC1 SGDID:S0000821, Chr V from 192796-194229, Verified ORF	YER019W	-100	0.000960158
YKL004W AUR1 SGDID:S0001487, Chr XI from 435223-436428, Verified ORF	YKL004W	-100	0.000949244
YDL015C TSC13 SGDID:S0002173, Chr IV from 426931-425999, reverse complement, Verified ORF	YDL015C	-100	0.000894203
YOR085W OST3 SGDID:S0005611, Chr XV from 482034-483086, Verified ORF	YOR085W	-100	0.000835599
YGR103W NOP7 SGDID:S0003335, Chr VII from 695421-697238, Verified ORF	YGR103W	-100	0.000828977
YBR247C ENP1 SGDID:S0000451, Chr II from 714450-712999, reverse complement, Verified ORF	YBR247C	-100	0.00073454
YDL123W SNA4 SGDID:S0002281, Chr IV from 241418-241840, Verified ORF	YDL123W	-100	0.000728255
YDL035C GPR1 SGDID:S0002193, Chr IV from 392054-389169, reverse complement, Verified ORF	YDL035C	-100	0.000690335
YIL023C YIL023C SGDID:S0001285, Chr IX from 310424-309384, reverse complement, Uncharacterized ORF	YIL023C	-100	0.000623168
YGL023C PIB2 SGDID:S0002991, Chr VII from 452109-450202, reverse complement, Verified ORF	YGL023C	-100	0.000532243
YBR163W DEM1 SGDID:S0000367, Chr II from 565718-567475, Verified ORF	YBR163W	-100	0.000528962
YMR120C ADE17 SGDID:S0004727, Chr XIII from 509279-507501, reverse complement, Verified ORF	YMR120C	-100	0.000429897
YER077C YER077C SGDID:S0000879, Chr V from 316596-314530, reverse complement, Uncharacterized ORF	YER077C	-100	0.000398309
YBR084W MIS1 SGDID:S0000288, Chr II from 411048-413975, Verified ORF	YBR084W	-100	0.000362326
YGR060W ERG25 SGDID:S0003292, Chr VII from 610568-611497, Verified ORF	YGR060W	-100	0.000346811
YDL029W ARP2 SGDID:S0002187, Chr IV from 399337-399358,399482-400635, Verified ORF	YDL029W	-100	0.000333776
YHR151C YHR151C SGDID:S0001194, Chr VIII from 400850-399270, reverse complement, Uncharacterized ORF	YHR151C	-100	0.000287538
YOL120C RPL18A SGDID:S0005480, Chr XV from 94401-94290,93842-93394, reverse complement, Verified ORF	YOL120C	-100	0.000265413
YJL154C VPS35 SGDID:S0003690, Chr X from 133853-131019, reverse complement, Verified ORF	YJL154C	-100	0.0002354
YLR244C MAP1 SGDID:S0004234, Chr XII from 626333-625170, reverse complement, Verified ORF	YLR244C	-100	0.000168044
YDR237W MRPL7 SGDID:S0002645, Chr IV from 936609-937487, Verified ORF	YDR237W	-100	0.000164673
YMR290C HAS1 SGDID:S0004903, Chr XIII from 851590-850073, reverse complement, Verified ORF	YMR290C	-100	0.000146063
YCL064C CHA1 SGDID:S0000569, Chr III from 16880-15798, reverse complement, Verified ORF	YCL064C	-100	0.000133829
YBR059C AKL1 SGDID:S0000263, Chr II from 360185-356859, reverse complement, Verified ORF	YBR059C	-100	0.000128977
YLL002W RTT109 SGDID:S0003925, Chr XII from 146290-147600, Verified ORF	YLL002W	-100	0.000104799
YGL253W HXK2 SGDID:S0003222, Chr VII from 23935-25395, Verified ORF	YGL253W	-100	7.7836e-05
YBR211C AME1 SGDID:S0000415, Chr II from 647127-646153, reverse complement, Verified ORF	YBR211C	-100	7.41084e-05
YLR234W TOP3 SGDID:S0004224, Chr XII from 609785-611755, Verified ORF	YLR234W	-100	4.72799e-05
YKR002W PAP1 SGDID:S0001710, Chr XI from 442875-444581, Verified ORF	YKR002W	-100	4.06522e-05
YNL032W SIW14 SGDID:S0004977, Chr XIV from 574505-575350, Verified ORF	YNL032W	-100	3.73304e-05
YDL201W TRM8 SGDID:S0002360, Chr IV from 99562-100422, Verified ORF	YDL201W	-100	2.62658e-05
YHR056C RSC30 SGDID:S0001098, Chr VIII from 217835-215184, reverse complement, Verified ORF	YHR056C	-100	2.2481e-05
YJL050W MTR4 SGDID:S0003586, Chr X from 342438-345659, Verified ORF	YJL050W	-100	2.13867e-05
YIL030C SSM4 SGDID:S0001292, Chr IX from 300008-296049, reverse complement, Verified ORF	YIL030C	-100	1.93087e-05
YPR160W GPH1 SGDID:S0006364, Chr XVI from 861302-864010, Verified ORF	YPR160W	-100	1.56459e-05
YJL130C URA2 SGDID:S0003666, Chr X from 172285-165641, reverse complement, Verified ORF	YJL130C	-100	1.27114e-05
YLR430W SEN1 SGDID:S0004422, Chr XII from 993430-1000125, Verified ORF	YLR430W	-100	9.05723e-06
YDL199C YDL199C SGDID:S0002358, Chr IV from 103354-101291, reverse complement, Uncharacterized ORF	YDL199C	-100	8.41173e-06
YDR371W CTS2 SGDID:S0002779, Chr IV from 1219403-1220938, Uncharacterized ORF	YDR371W	-100	8.3287e-06
YDL236W PHO13 SGDID:S0002395, Chr IV from 32296-33234, Verified ORF	YDL236W	-100	7.66325e-06
YHR007C ERG11 SGDID:S0001049, Chr VIII from 121677-120085, reverse complement, Verified ORF	YHR007C	-100	4.98354e-06
YOR157C PUP1 SGDID:S0005683, Chr XV from 631751-630966, reverse complement, Verified ORF	YOR157C	-100	4.62135e-06
YAL018C YAL018C SGDID:S0000016, Chr I from 119542-118565, reverse complement, Uncharacterized ORF	YAL018C	-100	4.52347e-06
YMR218C TRS130 SGDID:S0004831, Chr XIII from 706886-703578, reverse complement, Verified ORF	YMR218C	-100	3.01495e-06
YPL150W YPL150W SGDID:S0006071, Chr XVI from 268187-270892, Uncharacterized ORF	YPL150W	-100	2.99438e-06
YGR171C MSM1 SGDID:S0003403, Chr VII from 842556-840829, reverse complement, Verified ORF	YGR171C	-100	1.8453e-06
YNL288W CAF40 SGDID:S0005232, Chr XIV from 90301-91422, Verified ORF	YNL288W	-100	1.76086e-06
YJR141W YJR141W SGDID:S0003902, Chr X from 695821-696864, Uncharacterized ORF	YJR141W	-100	1.27565e-06
YJR035W RAD26 SGDID:S0003796, Chr X from 497269-500526, Verified ORF	YJR035W	-100	8.04052e-07
YDR132C YDR132C SGDID:S0002539, Chr IV from 720298-718811, reverse complement, Uncharacterized ORF	YDR132C	-100	5.83801e-07
YPR184W GDB1 SGDID:S0006388, Chr XVI from 902040-906650, Verified ORF	YPR184W	-100	5.51397e-07
YMR101C SRT1 SGDID:S0004707, Chr XIII from 469475-468444, reverse complement, Verified ORF	YMR101C	-100	4.54004e-07
YKR085C MRPL20 SGDID:S0001793, Chr XI from 599323-598736, reverse complement, Verified ORF	YKR085C	-100	2.22479e-07
YBR034C HMT1 SGDID:S0000238, Chr II from 305976-304930, reverse complement, Verified ORF	YBR034C	-100	8.1578e-08
YDR171W HSP42 SGDID:S0002578, Chr IV from 806616-807743, Verified ORF	YDR171W	-100	7.48139e-08
YLL027W ISA1 SGDID:S0003950, Chr XII from 87402-88154, Verified ORF	YLL027W	-100	7.31233e-08
YBR086C IST2 SGDID:S0000290, Chr II from 423035-420195, reverse complement, Verified ORF	YBR086C	-100	5.84205e-08
YNR045W PET494 SGDID:S0005328, Chr XIV from 706139-707608, Verified ORF	YNR045W	-100	4.98548e-08
YOR191W RIS1 SGDID:S0005717, Chr XV from 692475-697334, Verified ORF	YOR191W	-100	4.46918e-08
YOL142W RRP40 SGDID:S0005502, Chr XV from 55556-56278, Verified ORF	YOL142W	-100	4.24841e-08
YOR152C YOR152C SGDID:S0005678, Chr XV from 618288-617518, reverse complement, Uncharacterized ORF	YOR152C	-100	3.4172e-08
YKL184W SPE1 SGDID:S0001667, Chr XI from 96762-98162, Verified ORF	YKL184W	-100	2.83502e-08
YBR129C OPY1 SGDID:S0000333, Chr II from 495333-494347, reverse complement, Verified ORF	YBR129C	-100	2.71957e-08
YDR208W MSS4 SGDID:S0002616, Chr IV from 868219-870558, Verified ORF	YDR208W	-100	1.81413e-08
YGL140C YGL140C SGDID:S0003108, Chr VII from 245017-241358, reverse complement, Uncharacterized ORF	YGL140C	-100	1.77439e-08
YKL025C PAN3 SGDID:S0001508, Chr XI from 391922-389883, reverse complement, Verified ORF	YKL025C	-100	1.4713e-08
YLR381W CTF3 SGDID:S0004373, Chr XII from 879723-881924, Verified ORF	YLR381W	-100	7.79707e-09
YJR131W MNS1 SGDID:S0003892, Chr X from 667559-669208, Verified ORF	YJR131W	-100	7.762e-09
YOR066W YOR066W SGDID:S0005592, Chr XV from 449437-451326, Uncharacterized ORF	YOR066W	-100	7.762e-09
YGR140W CBF2 SGDID:S0003372, Chr VII from 767434-770304, Verified ORF	YGR140W	-100	6.70545e-09
YJR072C NPA3 SGDID:S0003833, Chr X from 572038-570881, reverse complement, Verified ORF	YJR072C	-100	4.58854e-09
YKL176C LST4 SGDID:S0001659, Chr XI from 117991-115505, reverse complement, Verified ORF	YKL176C	-100	1.86054e-09
YPL244C HUT1 SGDID:S0006165, Chr XVI from 88033-87014, reverse complement, Verified ORF	YPL244C	-100	1.72244e-09
YDL020C RPN4 SGDID:S0002178, Chr IV from 416705-415110, reverse complement, Verified ORF	YDL020C	-100	1.5706e-09
YGR138C TPO2 SGDID:S0003370, Chr VII from 765611-763767, reverse complement, Verified ORF	YGR138C	-100	1.22074e-09
YAL026C DRS2 SGDID:S0000024, Chr I from 99698-95631, reverse complement, Verified ORF	YAL026C	-100	1.07024e-09
YDR180W SCC2 SGDID:S0002588, Chr IV from 821290-825771, Verified ORF	YDR180W	-100	3.93735e-10
YML018C YML018C SGDID:S0004480, Chr XIII from 235952-234771, reverse complement, Uncharacterized ORF	YML018C	-100	3.0944e-10
YNL012W SPO1 SGDID:S0004957, Chr XIV from 609685-609789,609874-611664, Verified ORF	YNL012W	-100	8.04565e-11
YPR156C TPO3 SGDID:S0006360, Chr XVI from 839773-837905, reverse complement, Verified ORF	YPR156C	-100	4.04419e-11
YOL076W MDM20 SGDID:S0005436, Chr XV from 187023-189413, Verified ORF	YOL076W	-100	4.82825e-12
YGR231C PHB2 SGDID:S0003463, Chr VII from 953482-952550, reverse complement, Verified ORF	YGR231C	-100	1.32983e-12
YDL047W SIT4 SGDID:S0002205, Chr IV from 369769-370704, Verified ORF	YDL047W	-100	9.80105e-13
YLR304C ACO1 SGDID:S0004295, Chr XII from 737550-735214, reverse complement, Verified ORF	YLR304C	-100	9.11382e-13
YIL112W HOS4 SGDID:S0001374, Chr IX from 151592-154843, Uncharacterized ORF	YIL112W	-100	1.11022e-15
YBL034C STU1 SGDID:S0000130, Chr II from 158392-153851, reverse complement, Verified ORF	YBL034C	-100	0
YBL058W SHP1 SGDID:S0000154, Chr II from 111439-112710, Verified ORF	YBL058W	-100	0
YBR004C FMP44 SGDID:S0000208, Chr II from 245669-244368, reverse complement, Uncharacterized ORF	YBR004C	-100	0
YBR074W YBR074W SGDID:S0000278, Chr II from 386281-389211, Uncharacterized ORF	YBR074W	-100	0
YDL160C DHH1 SGDID:S0002319, Chr IV from 171931-170411, reverse complement, Verified ORF	YDL160C	-100	0
YDR113C PDS1 SGDID:S0002520, Chr IV from 681612-680491, reverse complement, Verified ORF	YDR113C	-100	0
YDR245W MNN10 SGDID:S0002653, Chr IV from 952794-953975, Verified ORF	YDR245W	-100	0
YDR275W BSC2 SGDID:S0002683, Chr IV from 1012246-1012953, Verified ORF	YDR275W	-100	0
YDR520C YDR520C SGDID:S0002928, Chr IV from 1483393-1481075, reverse complement, Uncharacterized ORF	YDR520C	-100	0
YEL025C YEL025C SGDID:S0000751, Chr V from 106147-102581, reverse complement, Uncharacterized ORF	YEL025C	-100	0
YEL064C AVT2 SGDID:S0000790, Chr V from 31239-29797, reverse complement, Verified ORF	YEL064C	-100	0
YGR015C YGR015C SGDID:S0003247, Chr VII from 522080-521094, reverse complement, Uncharacterized ORF	YGR015C	-100	0
YGR041W BUD9 SGDID:S0003273, Chr VII from 577491-579134, Verified ORF	YGR041W	-100	0
YHR149C SKG6 SGDID:S0001192, Chr VIII from 396661-394457, reverse complement, Uncharacterized ORF	YHR149C	-100	0
YHR160C PEX18 SGDID:S0001203, Chr VIII from 420074-419223, reverse complement, Verified ORF	YHR160C	-100	0
YIL005W EPS1 SGDID:S0001267, Chr IX from 345689-347794, Verified ORF	YIL005W	-100	0
YJL134W LCB3 SGDID:S0003670, Chr X from 158106-159335, Verified ORF	YJL134W	-100	0
YJL193W YJL193W SGDID:S0003729, Chr X from 71365-72573, Uncharacterized ORF	YJL193W	-100	0
YJR094C IME1 SGDID:S0003854, Chr X from 605568-604486, reverse complement, Verified ORF	YJR094C	-100	0
YJR106W ECM27 SGDID:S0003867, Chr X from 624751-626928, Verified ORF	YJR106W	-100	0
YJR110W YMR1 SGDID:S0003871, Chr X from 633530-635596, Uncharacterized ORF	YJR110W	-100	0
YJR127C ZMS1 SGDID:S0003888, Chr X from 662974-658832, reverse complement, Verified ORF	YJR127C	-100	0
YKL014C URB1 SGDID:S0001497, Chr XI from 416556-411262, reverse complement, Verified ORF	YKL014C	-100	0
YLR095C IOC2 SGDID:S0004085, Chr XII from 332116-329678, reverse complement, Verified ORF	YLR095C	-100	0
YLR144C ACF2 SGDID:S0004134, Chr XII from 432017-429678, reverse complement, Verified ORF	YLR144C	-100	0
YMR016C SOK2 SGDID:S0004618, Chr XIII from 305592-303235, reverse complement, Verified ORF	YMR016C	-100	0
YMR070W MOT3 SGDID:S0004674, Chr XIII from 409153-410625, Verified ORF	YMR070W	-100	0
YMR163C YMR163C SGDID:S0004773, Chr XIII from 586387-584270, reverse complement, Uncharacterized ORF	YMR163C	-100	0
YMR209C YMR209C SGDID:S0004822, Chr XIII from 687283-685910, reverse complement, Uncharacterized ORF	YMR209C	-100	0
YNL124W NAF1 SGDID:S0005068, Chr XIV from 392892-394370, Verified ORF	YNL124W	-100	0
YNL213C YNL213C SGDID:S0005157, Chr XIV from 247103-246459, reverse complement, Uncharacterized ORF	YNL213C	-100	0
YNL223W ATG4 SGDID:S0005167, Chr XIV from 227369-228853, Verified ORF	YNL223W	-100	0
YNL232W CSL4 SGDID:S0005176, Chr XIV from 214922-215800, Verified ORF	YNL232W	-100	0
YNL321W YNL321W SGDID:S0005265, Chr XIV from 34695-37421, Uncharacterized ORF	YNL321W	-100	0
YNL329C PEX6 SGDID:S0005273, Chr XIV from 22633-19541, reverse complement, Verified ORF	YNL329C	-100	0
YOL138C YOL138C SGDID:S0005498, Chr XV from 65349-61324, reverse complement, Uncharacterized ORF	YOL138C	-100	0
YOR002W ALG6 SGDID:S0005528, Chr XV from 329417-331051, Verified ORF	YOR002W	-100	0
YPL147W PXA1 SGDID:S0006068, Chr XVI from 273254-275866, Verified ORF	YPL147W	-100	0
YPL246C RBD2 SGDID:S0006167, Chr XVI from 85297-84509, reverse complement, Verified ORF	YPL246C	-100	0
YIL080W YIL080W SGDID:S0001342, Chr IX from 205632-206481,206483-210354, Pseudogene Ty ORF	YIL080W	-100	-100
YCL074W YCL074W SGDID:S0000579, Chr III from 2824-3750, Pseudogene Ty ORF	YCL074W	-100	-100
YGR226C YGR226C SGDID:S0003458, Chr VII from 947003-946404, reverse complement, Uncharacterized ORF	YGR226C	-100	-100
YLL017W YLL017W SGDID:S0003940, Chr XII from 112233-112544, Pseudogene ORF	YLL017W	-100	-100
YOR147W MDM32 SGDID:S0005673, Chr XV from 606514-608475, Verified ORF	YOR147W	-100	-100
YOR197W MCA1 SGDID:S0005723, Chr XV from 717023-718384, Verified ORF	YOR197W	-100	-100
YAL016C-B YAL016C-B SGDID:S0028528, Chr I from 124493-124308, reverse complement, Uncharacterized ORF	YAL016C-B	-100	-100
YIR043C YIR043C SGDID:S0001482, Chr IX from 437732-437040, reverse complement, Pseudogene ORF	YIR043C	-100	-100
YOR091W YOR091W SGDID:S0005617, Chr XV from 493265-494470, Uncharacterized ORF	YOR091W	-100	-100
YAL001C TFC3 SGDID:S0000001, Chr I from 151168-151099,151008-147596, reverse complement, Verified ORF	YAL001C	-100	-100
YAL003W EFB1 SGDID:S0000003, Chr I from 142176-142255,142622-143162, Verified ORF	YAL003W	-100	-100
YAL005C SSA1 SGDID:S0000004, Chr I from 141433-139505, reverse complement, Verified ORF	YAL005C	-100	-100
YAL007C ERP2 SGDID:S0000005, Chr I from 138347-137700, reverse complement, Verified ORF	YAL007C	-100	-100
YAL008W FUN14 SGDID:S0000006, Chr I from 136916-137512, Verified ORF	YAL008W	-100	-100
YAL009W SPO7 SGDID:S0000007, Chr I from 135856-136635, Verified ORF	YAL009W	-100	-100
YAL010C MDM10 SGDID:S0000008, Chr I from 135667-134186, reverse complement, Verified ORF	YAL010C	-100	-100
YAL011W SWC3 SGDID:S0000009, Chr I from 132202-134079, Verified ORF	YAL011W	-100	-100
YAL012W CYS3 SGDID:S0000010, Chr I from 130802-131986, Verified ORF	YAL012W	-100	-100
YAL013W DEP1 SGDID:S0000011, Chr I from 129271-130533, Verified ORF	YAL013W	-100	-100
YAL014C SYN8 SGDID:S0000012, Chr I from 129020-128253, reverse complement, Verified ORF	YAL014C	-100	-100
YAL015C NTG1 SGDID:S0000013, Chr I from 128103-126904, reverse complement, Verified ORF	YAL015C	-100	-100
YAL016W TPD3 SGDID:S0000014, Chr I from 124880-126787, Verified ORF	YAL016W	-100	-100
YAL019W FUN30 SGDID:S0000017, Chr I from 114920-118315, Verified ORF	YAL019W	-100	-100
YAL020C ATS1 SGDID:S0000018, Chr I from 114616-113615, reverse complement, Verified ORF	YAL020C	-100	-100
YAL022C FUN26 SGDID:S0000020, Chr I from 110431-108878, reverse complement, Verified ORF	YAL022C	-100	-100
YAL023C PMT2 SGDID:S0000021, Chr I from 108552-106273, reverse complement, Verified ORF	YAL023C	-100	-100
YAL025C MAK16 SGDID:S0000023, Chr I from 101146-100226, reverse complement, Verified ORF	YAL025C	-100	-100
YAL027W YAL027W SGDID:S0000025, Chr I from 94688-95473, Uncharacterized ORF	YAL027W	-100	-100
YAL028W FRT2 SGDID:S0000026, Chr I from 92901-94487, Verified ORF	YAL028W	-100	-100
YAL030W SNC1 SGDID:S0000028, Chr I from 87287-87388,87502-87753, Verified ORF	YAL030W	-100	-100
YAL032C PRP45 SGDID:S0000030, Chr I from 84475-83336, reverse complement, Verified ORF	YAL032C	-100	-100
YAL033W POP5 SGDID:S0000031, Chr I from 82707-83228, Verified ORF	YAL033W	-100	-100
YAL034C FUN19 SGDID:S0002134, Chr I from 81952-80711, reverse complement, Verified ORF	YAL034C	-100	-100
YAL034W-A MTW1 SGDID:S0000032, Chr I from 79719-80588, Verified ORF	YAL034W-A	-100	-100
YAL035W FUN12 SGDID:S0000033, Chr I from 76428-79436, Verified ORF	YAL035W	-100	-100
YAL036C RBG1 SGDID:S0000034, Chr I from 76153-75044, reverse complement, Verified ORF	YAL036C	-100	-100
YAL037C-A YAL037C-A SGDID:S0028732, Chr I from 73519-73427, reverse complement, Uncharacterized ORF	YAL037C-A	-100	-100
YAL037W YAL037W SGDID:S0000035, Chr I from 74021-74824, Uncharacterized ORF	YAL037W	-100	-100
YAL038W CDC19 SGDID:S0000036, Chr I from 71787-73289, Verified ORF	YAL038W	-100	-100
YAL039C CYC3 SGDID:S0000037, Chr I from 69526-68717, reverse complement, Verified ORF	YAL039C	-100	-100
YAL042W ERV46 SGDID:S0000040, Chr I from 61317-62564, Verified ORF	YAL042W	-100	-100
YAL043C PTA1 SGDID:S0000041, Chr I from 61053-58696, reverse complement, Verified ORF	YAL043C	-100	-100
YAL044C GCV3 SGDID:S0000042, Chr I from 58463-57951, reverse complement, Verified ORF	YAL044C	-100	-100
YAL044W-A YAL044W-A SGDID:S0007586, Chr I from 57519-57851, Uncharacterized ORF	YAL044W-A	-100	-100
YAL046C YAL046C SGDID:S0000044, Chr I from 57386-57030, reverse complement, Uncharacterized ORF	YAL046C	-100	-100
YAL047C SPC72 SGDID:S0000045, Chr I from 56858-54990, reverse complement, Verified ORF	YAL047C	-100	-100
YAL048C GEM1 SGDID:S0000046, Chr I from 54790-52802, reverse complement, Uncharacterized ORF	YAL048C	-100	-100
YAL049C YAL049C SGDID:S0000047, Chr I from 52596-51856, reverse complement, Uncharacterized ORF	YAL049C	-100	-100
YAL051W OAF1 SGDID:S0000048, Chr I from 48565-51708, Verified ORF	YAL051W	-100	-100
YAL053W YAL053W SGDID:S0000049, Chr I from 45900-48251, Uncharacterized ORF	YAL053W	-100	-100
YAL054C ACS1 SGDID:S0000050, Chr I from 45023-42882, reverse complement, Verified ORF	YAL054C	-100	-100
YAL055W PEX22 SGDID:S0000051, Chr I from 42178-42720, Verified ORF	YAL055W	-100	-100
YAL056W GPB2 SGDID:S0000052, Chr I from 39260-41902, Verified ORF	YAL056W	-100	-100
YAL058W CNE1 SGDID:S0000054, Chr I from 37465-38973, Verified ORF	YAL058W	-100	-100
YAL059W ECM1 SGDID:S0000055, Chr I from 36510-37148, Verified ORF	YAL059W	-100	-100
YAL060W BDH1 SGDID:S0000056, Chr I from 35156-36304, Verified ORF	YAL060W	-100	-100
YAL062W GDH3 SGDID:S0000058, Chr I from 31568-32941, Verified ORF	YAL062W	-100	-100
YAL063C FLO9 SGDID:S0000059, Chr I from 27969-24001, reverse complement, Verified ORF	YAL063C	-100	-100
YAL063C-A YAL063C-A SGDID:S0028813, Chr I from 22687-22397, reverse complement, Uncharacterized ORF	YAL063C-A	-100	-100
YAL064C-A YAL064C-A SGDID:S0002140, Chr I from 13744-13364, reverse complement, Uncharacterized ORF	YAL064C-A	-100	-100
YAL064W-B YAL064W-B SGDID:S0002141, Chr I from 12047-12427, Uncharacterized ORF	YAL064W-B	-100	-100
YAL065C YAL065C SGDID:S0001817, Chr I from 11952-11566, reverse complement, Uncharacterized ORF	YAL065C	-100	-100
YAL067W-A YAL067W-A SGDID:S0028593, Chr I from 2480-2707, Uncharacterized ORF	YAL067W-A	-100	-100
YAL068C YAL068C SGDID:S0002142, Chr I from 2169-1807, reverse complement, Uncharacterized ORF	YAL068C	-100	-100
YAR002C-A ERP1 SGDID:S0002129, Chr I from 154726-154067, reverse complement, Verified ORF	YAR002C-A	-100	-100
YAR002W NUP60 SGDID:S0000063, Chr I from 152259-153878, Verified ORF	YAR002W	-100	-100
YAR007C RFA1 SGDID:S0000065, Chr I from 158621-156756, reverse complement, Verified ORF	YAR007C	-100	-100
YAR008W SEN34 SGDID:S0000066, Chr I from 158967-159794, Verified ORF	YAR008W	-100	-100
YAR009C YAR009C SGDID:S0000067, Chr I from 164188-160598, reverse complement, Ty ORF	YAR009C	-100	-100
YAR015W ADE1 SGDID:S0000070, Chr I from 169370-170290, Verified ORF	YAR015W	-100	-100
YAR018C KIN3 SGDID:S0000071, Chr I from 171698-170391, reverse complement, Verified ORF	YAR018C	-100	-100
YAR019C CDC15 SGDID:S0000072, Chr I from 175133-172209, reverse complement, Verified ORF	YAR019C	-100	-100
YAR020C PAU7 SGDID:S0000073, Chr I from 177021-176854, reverse complement, Verified ORF	YAR020C	-100	-100
YAR023C YAR023C SGDID:S0000074, Chr I from 179818-179279, reverse complement, Uncharacterized ORF	YAR023C	-100	-100
YAR027W UIP3 SGDID:S0000075, Chr I from 183764-184471, Verified ORF	YAR027W	-100	-100
YAR028W YAR028W SGDID:S0000076, Chr I from 184886-185590, Uncharacterized ORF	YAR028W	-100	-100
YAR029W YAR029W SGDID:S0000077, Chr I from 186315-186539, Uncharacterized ORF	YAR029W	-100	-100
YAR033W MST28 SGDID:S0000079, Chr I from 188101-188805, Verified ORF	YAR033W	-100	-100
YAR035C-A YAR035C-A SGDID:S0028595, Chr I from 192411-192331, reverse complement, Uncharacterized ORF	YAR035C-A	-100	-100
YAR035W YAT1 SGDID:S0000080, Chr I from 190187-192250, Verified ORF	YAR035W	-100	-100
YAR050W FLO1 SGDID:S0000084, Chr I from 203394-208007, Verified ORF	YAR050W	-100	-100
YAR061W YAR061W SGDID:S0000087, Chr I from 218131-218334, Pseudogene ORF	YAR061W	-100	-100
YAR062W YAR062W SGDID:S0000088, Chr I from 218540-219136, Pseudogene ORF	YAR062W	-100	-100
YAR064W YAR064W SGDID:S0000089, Chr I from 220189-220488, Uncharacterized ORF	YAR064W	-100	-100
YAR066W YAR066W SGDID:S0002144, Chr I from 221040-221651, Uncharacterized ORF	YAR066W	-100	-100
YAR068W YAR068W SGDID:S0000091, Chr I from 222397-222882, Uncharacterized ORF	YAR068W	-100	-100
YAR073W IMD1 SGDID:S0000095, Chr I from 227733-228944, Verified ORF	YAR073W	-100	-100
YAR075W YAR075W SGDID:S0002145, Chr I from 228835-229308, Uncharacterized ORF	YAR075W	-100	-100
YBL001C ECM15 SGDID:S0000097, Chr II from 237469-237155, reverse complement, Verified ORF	YBL001C	-100	-100
YBL002W HTB2 SGDID:S0000098, Chr II from 236495-236890, Verified ORF	YBL002W	-100	-100
YBL003C HTA2 SGDID:S0000099, Chr II from 235795-235397, reverse complement, Verified ORF	YBL003C	-100	-100
YBL005W PDR3 SGDID:S0000101, Chr II from 217473-220403, Verified ORF	YBL005W	-100	-100
YBL005W-B YBL005W-B SGDID:S0002147, Chr II from 221333-222637,222639-226601, Ty ORF	YBL005W-B	-100	-100
YBL006C LDB7 SGDID:S0000102, Chr II from 217132-216590, reverse complement, Verified ORF	YBL006C	-100	-100
YBL008W-A YBL008W-A SGDID:S0028529, Chr II from 209412-209651, Uncharacterized ORF	YBL008W-A	-100	-100
YBL009W YBL009W SGDID:S0000105, Chr II from 207197-209227, Uncharacterized ORF	YBL009W	-100	-100
YBL010C YBL010C SGDID:S0000106, Chr II from 206952-206110, reverse complement, Uncharacterized ORF	YBL010C	-100	-100
YBL013W FMT1 SGDID:S0000109, Chr II from 202059-203264, Verified ORF	YBL013W	-100	-100
YBL014C RRN6 SGDID:S0000110, Chr II from 201751-199067, reverse complement, Verified ORF	YBL014C	-100	-100
YBL015W ACH1 SGDID:S0000111, Chr II from 194125-195705, Verified ORF	YBL015W	-100	-100
YBL016W FUS3 SGDID:S0000112, Chr II from 192454-193515, Verified ORF	YBL016W	-100	-100
YBL018C POP8 SGDID:S0000114, Chr II from 186477-186431,186355-186001, reverse complement, Verified ORF	YBL018C	-100	-100
YBL019W APN2 SGDID:S0000115, Chr II from 184356-185918, Verified ORF	YBL019W	-100	-100
YBL020W RFT1 SGDID:S0000116, Chr II from 182404-184128, Verified ORF	YBL020W	-100	-100
YBL021C HAP3 SGDID:S0000117, Chr II from 182097-181663, reverse complement, Verified ORF	YBL021C	-100	-100
YBL022C PIM1 SGDID:S0000118, Chr II from 181278-177877, reverse complement, Verified ORF	YBL022C	-100	-100
YBL023C MCM2 SGDID:S0000119, Chr II from 177529-174923, reverse complement, Verified ORF	YBL023C	-100	-100
YBL024W NCL1 SGDID:S0000120, Chr II from 172537-174591, Verified ORF	YBL024W	-100	-100
YBL025W RRN10 SGDID:S0000121, Chr II from 171484-171921, Verified ORF	YBL025W	-100	-100
YBL026W LSM2 SGDID:S0000122, Chr II from 170626-170679,170808-171041, Verified ORF	YBL026W	-100	-100
YBL028C YBL028C SGDID:S0000124, Chr II from 167841-167521, reverse complement, Uncharacterized ORF	YBL028C	-100	-100
YBL029C-A YBL029C-A SGDID:S0007591, Chr II from 164775-164491, reverse complement, Uncharacterized ORF	YBL029C-A	-100	-100
YBL029W YBL029W SGDID:S0000125, Chr II from 166137-167267, Uncharacterized ORF	YBL029W	-100	-100
YBL030C PET9 SGDID:S0000126, Chr II from 164000-163044, reverse complement, Verified ORF	YBL030C	-100	-100
YBL031W SHE1 SGDID:S0000127, Chr II from 161702-162718, Verified ORF	YBL031W	-100	-100
YBL033C RIB1 SGDID:S0000129, Chr II from 159696-158659, reverse complement, Verified ORF	YBL033C	-100	-100
YBL035C POL12 SGDID:S0000131, Chr II from 153613-151496, reverse complement, Verified ORF	YBL035C	-100	-100
YBL036C YBL036C SGDID:S0000132, Chr II from 151223-150450, reverse complement, Verified ORF	YBL036C	-100	-100
YBL037W APL3 SGDID:S0000133, Chr II from 147212-150289, Verified ORF	YBL037W	-100	-100
YBL038W MRPL16 SGDID:S0000134, Chr II from 146190-146888, Verified ORF	YBL038W	-100	-100
YBL039C URA7 SGDID:S0000135, Chr II from 145731-143992, reverse complement, Verified ORF	YBL039C	-100	-100
YBL039W-A YBL039W-A SGDID:S0028517, Chr II from 143396-143575, Uncharacterized ORF	YBL039W-A	-100	-100
YBL040C ERD2 SGDID:S0000136, Chr II from 142871-142850,142752-142115, reverse complement, Verified ORF	YBL040C	-100	-100
YBL041W PRE7 SGDID:S0000137, Chr II from 141250-141975, Verified ORF	YBL041W	-100	-100
YBL042C FUI1 SGDID:S0000138, Chr II from 140263-138344, reverse complement, Verified ORF	YBL042C	-100	-100
YBL043W ECM13 SGDID:S0000139, Chr II from 136691-137464, Verified ORF	YBL043W	-100	-100
YBL044W YBL044W SGDID:S0000140, Chr II from 136001-136369, Uncharacterized ORF	YBL044W	-100	-100
YBL045C COR1 SGDID:S0000141, Chr II from 135519-134146, reverse complement, Verified ORF	YBL045C	-100	-100
YBL046W YBL046W SGDID:S0000142, Chr II from 132427-133752, Uncharacterized ORF	YBL046W	-100	-100
YBL047C EDE1 SGDID:S0000143, Chr II from 132043-127898, reverse complement, Verified ORF	YBL047C	-100	-100
YBL049W MOH1 SGDID:S0000145, Chr II from 126831-127247, Uncharacterized ORF	YBL049W	-100	-100
YBL050W SEC17 SGDID:S0000146, Chr II from 125128-125157,125274-126122, Verified ORF	YBL050W	-100	-100
YBL051C PIN4 SGDID:S0000147, Chr II from 124762-122756, reverse complement, Verified ORF	YBL051C	-100	-100
YBL052C SAS3 SGDID:S0000148, Chr II from 121877-119382, reverse complement, Verified ORF	YBL052C	-100	-100
YBL055C YBL055C SGDID:S0000151, Chr II from 116832-115576, reverse complement, Uncharacterized ORF	YBL055C	-100	-100
YBL056W PTC3 SGDID:S0000152, Chr II from 113765-115171, Verified ORF	YBL056W	-100	-100
YBL057C PTH2 SGDID:S0000153, Chr II from 113447-112803, reverse complement, Verified ORF	YBL057C	-100	-100
YBL059C-A YBL059C-A SGDID:S0007488, Chr II from 110541-110508,110422-110127, reverse complement, Uncharacterized ORF	YBL059C-A	-100	-100
YBL059W YBL059W SGDID:S0000155, Chr II from 110596-110881,110951-111246, Uncharacterized ORF	YBL059W	-100	-100
YBL060W YBL060W SGDID:S0000156, Chr II from 107934-109997, Uncharacterized ORF	YBL060W	-100	-100
YBL063W KIP1 SGDID:S0000159, Chr II from 101888-105223, Verified ORF	YBL063W	-100	-100
YBL064C PRX1 SGDID:S0000160, Chr II from 101158-100373, reverse complement, Verified ORF	YBL064C	-100	-100
YBL066C SEF1 SGDID:S0000162, Chr II from 100117-96671, reverse complement, Verified ORF	YBL066C	-100	-100
YBL067C UBP13 SGDID:S0000163, Chr II from 95884-93641, reverse complement, Verified ORF	YBL067C	-100	-100
YBL068W PRS4 SGDID:S0000164, Chr II from 92412-93395, Verified ORF	YBL068W	-100	-100
YBL069W AST1 SGDID:S0000165, Chr II from 90739-92028, Verified ORF	YBL069W	-100	-100
YBL071C-B YBL071C-B SGDID:S0028597, Chr II from 89554-89456, reverse complement, Uncharacterized ORF	YBL071C-B	-100	-100
YBL071W-A KTI11 SGDID:S0007587, Chr II from 89976-90224, Verified ORF	YBL071W-A	-100	-100
YBL074C AAR2 SGDID:S0000170, Chr II from 87787-86720, reverse complement, Verified ORF	YBL074C	-100	-100
YBL075C SSA3 SGDID:S0000171, Chr II from 86446-84497, reverse complement, Verified ORF	YBL075C	-100	-100
YBL078C ATG8 SGDID:S0000174, Chr II from 80728-80375, reverse complement, Verified ORF	YBL078C	-100	-100
YBL080C PET112 SGDID:S0000176, Chr II from 74692-73067, reverse complement, Verified ORF	YBL080C	-100	-100
YBL081W YBL081W SGDID:S0000177, Chr II from 71863-72969, Uncharacterized ORF	YBL081W	-100	-100
YBL087C RPL23A SGDID:S0000183, Chr II from 60735-60694,60189-59818, reverse complement, Verified ORF	YBL087C	-100	-100
YBL089W AVT5 SGDID:S0000185, Chr II from 49571-50950, Verified ORF	YBL089W	-100	-100
YBL090W MRP21 SGDID:S0000186, Chr II from 48822-49355, Verified ORF	YBL090W	-100	-100
YBL091C MAP2 SGDID:S0000187, Chr II from 48625-47360, reverse complement, Verified ORF	YBL091C	-100	-100
YBL091C-A SCS22 SGDID:S0007228, Chr II from 47177-47144,47055-46562, reverse complement, Uncharacterized ORF	YBL091C-A	-100	-100
YBL092W RPL32 SGDID:S0000188, Chr II from 45975-46367, Verified ORF	YBL092W	-100	-100
YBL093C ROX3 SGDID:S0000189, Chr II from 44915-44253, reverse complement, Verified ORF	YBL093C	-100	-100
YBL095W YBL095W SGDID:S0000191, Chr II from 43274-44086, Uncharacterized ORF	YBL095W	-100	-100
YBL097W BRN1 SGDID:S0000193, Chr II from 40828-43092, Verified ORF	YBL097W	-100	-100
YBL098W BNA4 SGDID:S0000194, Chr II from 39142-40524, Verified ORF	YBL098W	-100	-100
YBL099W ATP1 SGDID:S0000195, Chr II from 37050-38687, Verified ORF	YBL099W	-100	-100
YBL101W-A YBL101W-A SGDID:S0002148, Chr II from 29932-31248, Ty ORF	YBL101W-A	-100	-100
YBL101W-B YBL101W-B SGDID:S0002149, Chr II from 29932-31224,31226-35245, Ty ORF	YBL101W-B	-100	-100
YBL101W-C YBL101W-C SGDID:S0028598, Chr II from 28427-28546, Uncharacterized ORF	YBL101W-C	-100	-100
YBL103C RTG3 SGDID:S0000199, Chr II from 23535-22075, reverse complement, Verified ORF	YBL103C	-100	-100
YBL104C YBL104C SGDID:S0000200, Chr II from 21293-18177, reverse complement, Uncharacterized ORF	YBL104C	-100	-100
YBL107C YBL107C SGDID:S0000203, Chr II from 10551-9961, reverse complement, Uncharacterized ORF	YBL107C	-100	-100
YBL108C-A YBL108C-A SGDID:S0007592, Chr II from 7733-7605, reverse complement, Uncharacterized ORF	YBL108C-A	-100	-100
YBL111C YBL111C SGDID:S0002151, Chr II from 5009-4216,4116-2907, reverse complement, Uncharacterized ORF	YBL111C	-100	-100
YBL112C YBL112C SGDID:S0002152, Chr II from 2899-2582, reverse complement, Uncharacterized ORF	YBL112C	-100	-100
YBL113C YBL113C SGDID:S0002153, Chr II from 2658-280, reverse complement, Uncharacterized ORF	YBL113C	-100	-100
YBR002C RER2 SGDID:S0000206, Chr II from 242570-241710, reverse complement, Verified ORF	YBR002C	-100	-100
YBR005W RCR1 SGDID:S0000209, Chr II from 245908-246549, Uncharacterized ORF	YBR005W	-100	-100
YBR011C IPP1 SGDID:S0000215, Chr II from 257973-257110, reverse complement, Verified ORF	YBR011C	-100	-100
YBR012W-B YBR012W-B SGDID:S0002155, Chr II from 259867-261171,261173-265138, Ty ORF	YBR012W-B	-100	-100
YBR013C YBR013C SGDID:S0000217, Chr II from 265879-265490, reverse complement, Uncharacterized ORF	YBR013C	-100	-100
YBR014C YBR014C SGDID:S0000218, Chr II from 267336-266725, reverse complement, Uncharacterized ORF	YBR014C	-100	-100
YBR015C MNN2 SGDID:S0000219, Chr II from 269503-267710, reverse complement, Verified ORF	YBR015C	-100	-100
YBR016W YBR016W SGDID:S0000220, Chr II from 270247-270633, Uncharacterized ORF	YBR016W	-100	-100
YBR017C KAP104 SGDID:S0000221, Chr II from 273703-270947, reverse complement, Verified ORF	YBR017C	-100	-100
YBR019C GAL10 SGDID:S0000223, Chr II from 278352-276253, reverse complement, Verified ORF	YBR019C	-100	-100
YBR022W POA1 SGDID:S0000226, Chr II from 283738-284271, Uncharacterized ORF	YBR022W	-100	-100
YBR024W SCO2 SGDID:S0000228, Chr II from 289445-290350, Verified ORF	YBR024W	-100	-100
YBR025C YBR025C SGDID:S0000229, Chr II from 291865-290681, reverse complement, Uncharacterized ORF	YBR025C	-100	-100
YBR026C ETR1 SGDID:S0000230, Chr II from 294019-292877, reverse complement, Verified ORF	YBR026C	-100	-100
YBR028C YBR028C SGDID:S0000232, Chr II from 296002-294425, reverse complement, Uncharacterized ORF	YBR028C	-100	-100
YBR029C CDS1 SGDID:S0000233, Chr II from 297742-296369, reverse complement, Verified ORF	YBR029C	-100	-100
YBR030W YBR030W SGDID:S0000234, Chr II from 298292-299950, Uncharacterized ORF	YBR030W	-100	-100
YBR031W RPL4A SGDID:S0000235, Chr II from 300166-301254, Verified ORF	YBR031W	-100	-100
YBR033W EDS1 SGDID:S0000237, Chr II from 301944-304703, Uncharacterized ORF	YBR033W	-100	-100
YBR035C PDX3 SGDID:S0000239, Chr II from 306955-306269, reverse complement, Verified ORF	YBR035C	-100	-100
YBR036C CSG2 SGDID:S0000240, Chr II from 310313-309081, reverse complement, Verified ORF	YBR036C	-100	-100
YBR037C SCO1 SGDID:S0000241, Chr II from 311451-310564, reverse complement, Verified ORF	YBR037C	-100	-100
YBR038W CHS2 SGDID:S0000242, Chr II from 311897-314788, Verified ORF	YBR038W	-100	-100
YBR039W ATP3 SGDID:S0000243, Chr II from 315575-316510, Verified ORF	YBR039W	-100	-100
YBR040W FIG1 SGDID:S0000244, Chr II from 316968-317864, Verified ORF	YBR040W	-100	-100
YBR041W FAT1 SGDID:S0000245, Chr II from 318266-320275, Verified ORF	YBR041W	-100	-100
YBR043C QDR3 SGDID:S0000247, Chr II from 323945-321876, reverse complement, Uncharacterized ORF	YBR043C	-100	-100
YBR044C TCM62 SGDID:S0000248, Chr II from 326058-324337, reverse complement, Verified ORF	YBR044C	-100	-100
YBR045C GIP1 SGDID:S0000249, Chr II from 330090-328369, reverse complement, Verified ORF	YBR045C	-100	-100
YBR046C ZTA1 SGDID:S0000250, Chr II from 331509-330505, reverse complement, Verified ORF	YBR046C	-100	-100
YBR048W RPS11B SGDID:S0000252, Chr II from 332829-332873,333385-333810, Verified ORF	YBR048W	-100	-100
YBR050C REG2 SGDID:S0000254, Chr II from 338197-337181, reverse complement, Verified ORF	YBR050C	-100	-100
YBR052C YBR052C SGDID:S0000256, Chr II from 339350-338718, reverse complement, Uncharacterized ORF	YBR052C	-100	-100
YBR053C YBR053C SGDID:S0000257, Chr II from 340749-339673, reverse complement, Uncharacterized ORF	YBR053C	-100	-100
YBR054W YRO2 SGDID:S0000258, Chr II from 343099-344133, Verified ORF	YBR054W	-100	-100
YBR055C PRP6 SGDID:S0000259, Chr II from 347299-344600, reverse complement, Verified ORF	YBR055C	-100	-100
YBR056W YBR056W SGDID:S0000260, Chr II from 347877-349382, Uncharacterized ORF	YBR056W	-100	-100
YBR056W-A YBR056W-A SGDID:S0028736, Chr II from 351253-351453, Uncharacterized ORF	YBR056W-A	-100	-100
YBR057C MUM2 SGDID:S0000261, Chr II from 353291-352191, reverse complement, Verified ORF	YBR057C	-100	-100
YBR058C UBP14 SGDID:S0000262, Chr II from 356015-353670, reverse complement, Verified ORF	YBR058C	-100	-100
YBR058C-A TSC3 SGDID:S0007521, Chr II from 356564-356322, reverse complement, Verified ORF	YBR058C-A	-100	-100
YBR060C ORC2 SGDID:S0000264, Chr II from 362512-360650, reverse complement, Verified ORF	YBR060C	-100	-100
YBR061C TRM7 SGDID:S0000265, Chr II from 365717-364785, reverse complement, Verified ORF	YBR061C	-100	-100
YBR062C YBR062C SGDID:S0000266, Chr II from 366598-366583,366500-365974, reverse complement, Uncharacterized ORF	YBR062C	-100	-100
YBR063C YBR063C SGDID:S0000267, Chr II from 368182-366968, reverse complement, Uncharacterized ORF	YBR063C	-100	-100
YBR065C ECM2 SGDID:S0000269, Chr II from 369676-368582, reverse complement, Verified ORF	YBR065C	-100	-100
YBR067C TIP1 SGDID:S0000271, Chr II from 372732-372100, reverse complement, Verified ORF	YBR067C	-100	-100
YBR068C BAP2 SGDID:S0000272, Chr II from 375687-373858, reverse complement, Verified ORF	YBR068C	-100	-100
YBR070C YBR070C SGDID:S0000274, Chr II from 379931-379218, reverse complement, Uncharacterized ORF	YBR070C	-100	-100
YBR071W YBR071W SGDID:S0000275, Chr II from 380408-381043, Uncharacterized ORF	YBR071W	-100	-100
YBR072C-A YBR072C-A SGDID:S0028532, Chr II from 383016-382855, reverse complement, Uncharacterized ORF	YBR072C-A	-100	-100
YBR073W RDH54 SGDID:S0000277, Chr II from 383209-385983, Verified ORF	YBR073W	-100	-100
YBR076W ECM8 SGDID:S0000280, Chr II from 390369-391388, Verified ORF	YBR076W	-100	-100
YBR077C YBR077C SGDID:S0000281, Chr II from 392287-391799, reverse complement, Uncharacterized ORF	YBR077C	-100	-100
YBR078W ECM33 SGDID:S0000282, Chr II from 393118-393175,393506-394854, Verified ORF	YBR078W	-100	-100
YBR079C RPG1 SGDID:S0000283, Chr II from 398271-395377, reverse complement, Verified ORF	YBR079C	-100	-100
YBR080C SEC18 SGDID:S0000284, Chr II from 400884-398608, reverse complement, Verified ORF	YBR080C	-100	-100
YBR081C SPT7 SGDID:S0000285, Chr II from 405245-401247, reverse complement, Verified ORF	YBR081C	-100	-100
YBR082C UBC4 SGDID:S0000286, Chr II from 407163-407117,407021-406622, reverse complement, Verified ORF	YBR082C	-100	-100
YBR085C-A YBR085C-A SGDID:S0007522, Chr II from 419158-418901, reverse complement, Uncharacterized ORF	YBR085C-A	-100	-100
YBR085W AAC3 SGDID:S0000289, Chr II from 415977-416900, Verified ORF	YBR085W	-100	-100
YBR087W RFC5 SGDID:S0000291, Chr II from 423759-424823, Verified ORF	YBR087W	-100	-100
YBR088C POL30 SGDID:S0000292, Chr II from 425760-424984, reverse complement, Verified ORF	YBR088C	-100	-100
YBR089C-A NHP6B SGDID:S0002157, Chr II from 426483-426184, reverse complement, Verified ORF	YBR089C-A	-100	-100
YBR090C YBR090C SGDID:S0000294, Chr II from 427052-426868,426510-426327, reverse complement, Uncharacterized ORF	YBR090C	-100	-100
YBR091C MRS5 SGDID:S0000295, Chr II from 427478-427149, reverse complement, Verified ORF	YBR091C	-100	-100
YBR094W YBR094W SGDID:S0000298, Chr II from 432030-434291, Uncharacterized ORF	YBR094W	-100	-100
YBR095C RXT2 SGDID:S0000299, Chr II from 435692-434400, reverse complement, Uncharacterized ORF	YBR095C	-100	-100
YBR096W YBR096W SGDID:S0000300, Chr II from 436015-436707, Uncharacterized ORF	YBR096W	-100	-100
YBR097W VPS15 SGDID:S0000301, Chr II from 436945-441309, Verified ORF	YBR097W	-100	-100
YBR101C FES1 SGDID:S0000305, Chr II from 444687-443815, reverse complement, Verified ORF	YBR101C	-100	-100
YBR103W SIF2 SGDID:S0000307, Chr II from 447703-449310, Verified ORF	YBR103W	-100	-100
YBR104W YMC2 SGDID:S0000308, Chr II from 449661-450650, Verified ORF	YBR104W	-100	-100
YBR105C VID24 SGDID:S0000309, Chr II from 451963-450875, reverse complement, Verified ORF	YBR105C	-100	-100
YBR106W PHO88 SGDID:S0000310, Chr II from 452652-453218, Verified ORF	YBR106W	-100	-100
YBR107C IML3 SGDID:S0000311, Chr II from 454524-453787, reverse complement, Verified ORF	YBR107C	-100	-100
YBR109C CMD1 SGDID:S0000313, Chr II from 458356-457913, reverse complement, Verified ORF	YBR109C	-100	-100
YBR110W ALG1 SGDID:S0000314, Chr II from 458866-460215, Verified ORF	YBR110W	-100	-100
YBR111W-A SUS1 SGDID:S0028510, Chr II from 462133-462203,462284-462423,462494-462573, Verified ORF	YBR111W-A	-100	-100
YBR112C CYC8 SGDID:S0000316, Chr II from 465764-462864, reverse complement, Verified ORF	YBR112C	-100	-100
YBR114W RAD16 SGDID:S0000318, Chr II from 467242-469614, Verified ORF	YBR114W	-100	-100
YBR115C LYS2 SGDID:S0000319, Chr II from 473920-469742, reverse complement, Verified ORF	YBR115C	-100	-100
YBR117C TKL2 SGDID:S0000321, Chr II from 476431-474386, reverse complement, Verified ORF	YBR117C	-100	-100
YBR118W TEF2 SGDID:S0000322, Chr II from 477665-479041, Verified ORF	YBR118W	-100	-100
YBR119W MUD1 SGDID:S0000323, Chr II from 479332-479339,479429-480317, Verified ORF	YBR119W	-100	-100
YBR120C CBP6 SGDID:S0000324, Chr II from 480917-480429, reverse complement, Verified ORF	YBR120C	-100	-100
YBR121C GRS1 SGDID:S0000325, Chr II from 483361-481358, reverse complement, Verified ORF	YBR121C	-100	-100
YBR122C MRPL36 SGDID:S0000326, Chr II from 484497-483964, reverse complement, Verified ORF	YBR122C	-100	-100
YBR123C TFC1 SGDID:S0000327, Chr II from 486685-484736, reverse complement, Verified ORF	YBR123C	-100	-100
YBR125C PTC4 SGDID:S0000329, Chr II from 488374-487193, reverse complement, Verified ORF	YBR125C	-100	-100
YBR126C TPS1 SGDID:S0000330, Chr II from 490386-488899, reverse complement, Verified ORF	YBR126C	-100	-100
YBR127C VMA2 SGDID:S0000331, Chr II from 492816-491263, reverse complement, Verified ORF	YBR127C	-100	-100
YBR128C ATG14 SGDID:S0000332, Chr II from 494109-493075, reverse complement, Verified ORF	YBR128C	-100	-100
YBR130C SHE3 SGDID:S0000334, Chr II from 496863-495586, reverse complement, Verified ORF	YBR130C	-100	-100
YBR131W CCZ1 SGDID:S0000335, Chr II from 497157-499271, Verified ORF	YBR131W	-100	-100
YBR132C AGP2 SGDID:S0000336, Chr II from 501436-499646, reverse complement, Verified ORF	YBR132C	-100	-100
YBR135W CKS1 SGDID:S0000339, Chr II from 504848-505300, Verified ORF	YBR135W	-100	-100
YBR136W MEC1 SGDID:S0000340, Chr II from 505662-512768, Verified ORF	YBR136W	-100	-100
YBR137W YBR137W SGDID:S0000341, Chr II from 513038-513577, Uncharacterized ORF	YBR137W	-100	-100
YBR138C YBR138C SGDID:S0000342, Chr II from 515330-513756, reverse complement, Uncharacterized ORF	YBR138C	-100	-100
YBR139W YBR139W SGDID:S0000343, Chr II from 515658-517184, Uncharacterized ORF	YBR139W	-100	-100
YBR140C IRA1 SGDID:S0000344, Chr II from 526622-517344, reverse complement, Verified ORF	YBR140C	-100	-100
YBR141C YBR141C SGDID:S0000345, Chr II from 528032-527019, reverse complement, Uncharacterized ORF	YBR141C	-100	-100
YBR142W MAK5 SGDID:S0000346, Chr II from 528311-530632, Verified ORF	YBR142W	-100	-100
YBR143C SUP45 SGDID:S0000347, Chr II from 532176-530863, reverse complement, Verified ORF	YBR143C	-100	-100
YBR145W ADH5 SGDID:S0000349, Chr II from 533756-534811, Verified ORF	YBR145W	-100	-100
YBR146W MRPS9 SGDID:S0000350, Chr II from 535254-536090, Verified ORF	YBR146W	-100	-100
YBR147W YBR147W SGDID:S0000351, Chr II from 536569-537459, Uncharacterized ORF	YBR147W	-100	-100
YBR148W YSW1 SGDID:S0000352, Chr II from 537870-539699, Verified ORF	YBR148W	-100	-100
YBR150C TBS1 SGDID:S0000354, Chr II from 544487-541203, reverse complement, Verified ORF	YBR150C	-100	-100
YBR151W APD1 SGDID:S0000355, Chr II from 545022-545972, Verified ORF	YBR151W	-100	-100
YBR153W RIB7 SGDID:S0000357, Chr II from 547454-548188, Verified ORF	YBR153W	-100	-100
YBR155W CNS1 SGDID:S0000359, Chr II from 549765-550922, Verified ORF	YBR155W	-100	-100
YBR156C SLI15 SGDID:S0000360, Chr II from 553194-551098, reverse complement, Verified ORF	YBR156C	-100	-100
YBR158W AMN1 SGDID:S0000362, Chr II from 556543-558192, Verified ORF	YBR158W	-100	-100
YBR159W YBR159W SGDID:S0000363, Chr II from 558679-559722, Uncharacterized ORF	YBR159W	-100	-100
YBR160W CDC28 SGDID:S0000364, Chr II from 560072-560968, Verified ORF	YBR160W	-100	-100
YBR161W CSH1 SGDID:S0000365, Chr II from 561629-562759, Verified ORF	YBR161W	-100	-100
YBR162C TOS1 SGDID:S0000366, Chr II from 564565-563198, reverse complement, Uncharacterized ORF	YBR162C	-100	-100
YBR162W-A YSY6 SGDID:S0002158, Chr II from 565226-565423, Verified ORF	YBR162W-A	-100	-100
YBR164C ARL1 SGDID:S0000368, Chr II from 568421-567870, reverse complement, Verified ORF	YBR164C	-100	-100
YBR165W UBS1 SGDID:S0000369, Chr II from 568847-569680, Verified ORF	YBR165W	-100	-100
YBR166C TYR1 SGDID:S0000370, Chr II from 571195-569837, reverse complement, Verified ORF	YBR166C	-100	-100
YBR167C POP7 SGDID:S0000371, Chr II from 571885-571463, reverse complement, Verified ORF	YBR167C	-100	-100
YBR168W PEX32 SGDID:S0000372, Chr II from 572366-573607, Verified ORF	YBR168W	-100	-100
YBR169C SSE2 SGDID:S0000373, Chr II from 575991-573910, reverse complement, Verified ORF	YBR169C	-100	-100
YBR170C NPL4 SGDID:S0000374, Chr II from 578081-576339, reverse complement, Verified ORF	YBR170C	-100	-100
YBR171W SEC66 SGDID:S0000375, Chr II from 578359-578979, Verified ORF	YBR171W	-100	-100
YBR172C SMY2 SGDID:S0000376, Chr II from 581367-579145, reverse complement, Verified ORF	YBR172C	-100	-100
YBR173C UMP1 SGDID:S0000377, Chr II from 582167-581721, reverse complement, Verified ORF	YBR173C	-100	-100
YBR176W ECM31 SGDID:S0000380, Chr II from 583715-584653, Verified ORF	YBR176W	-100	-100
YBR177C EHT1 SGDID:S0000381, Chr II from 586157-584802, reverse complement, Verified ORF	YBR177C	-100	-100
YBR179C FZO1 SGDID:S0000383, Chr II from 589109-586542, reverse complement, Verified ORF	YBR179C	-100	-100
YBR180W DTR1 SGDID:S0000384, Chr II from 589736-591454, Verified ORF	YBR180W	-100	-100
YBR181C RPS6B SGDID:S0000385, Chr II from 592769-592764,592411-591707, reverse complement, Verified ORF	YBR181C	-100	-100
YBR182C SMP1 SGDID:S0000386, Chr II from 594859-593501, reverse complement, Verified ORF	YBR182C	-100	-100
YBR182C-A YBR182C-A SGDID:S0028603, Chr II from 595550-595356, reverse complement, Uncharacterized ORF	YBR182C-A	-100	-100
YBR185C MBA1 SGDID:S0000389, Chr II from 599954-599118, reverse complement, Verified ORF	YBR185C	-100	-100
YBR186W PCH2 SGDID:S0000390, Chr II from 600548-602098,602212-602355, Verified ORF	YBR186W	-100	-100
YBR187W YBR187W SGDID:S0000391, Chr II from 602629-603471, Uncharacterized ORF	YBR187W	-100	-100
YBR188C NTC20 SGDID:S0000392, Chr II from 604102-603680, reverse complement, Verified ORF	YBR188C	-100	-100
YBR189W RPS9B SGDID:S0000393, Chr II from 604503-604509,604923-605503, Verified ORF	YBR189W	-100	-100
YBR191W RPL21A SGDID:S0000395, Chr II from 606265-606275,606664-607135, Verified ORF	YBR191W	-100	-100
YBR192W RIM2 SGDID:S0000396, Chr II from 607647-608780, Verified ORF	YBR192W	-100	-100
YBR193C MED8 SGDID:S0000397, Chr II from 609748-609077, reverse complement, Verified ORF	YBR193C	-100	-100
YBR194W SOY1 SGDID:S0000398, Chr II from 610033-610404, Uncharacterized ORF	YBR194W	-100	-100
YBR196C-A YBR196C-A SGDID:S0028534, Chr II from 614168-614019, reverse complement, Uncharacterized ORF	YBR196C-A	-100	-100
YBR196C-B YBR196C-B SGDID:S0028816, Chr II from 614625-614521, reverse complement, Uncharacterized ORF	YBR196C-B	-100	-100
YBR197C YBR197C SGDID:S0000401, Chr II from 615851-615198, reverse complement, Uncharacterized ORF	YBR197C	-100	-100
YBR198C TAF5 SGDID:S0000402, Chr II from 618518-616122, reverse complement, Verified ORF	YBR198C	-100	-100
YBR199W KTR4 SGDID:S0000403, Chr II from 618904-620298, Verified ORF	YBR199W	-100	-100
YBR200W BEM1 SGDID:S0000404, Chr II from 620867-622522, Verified ORF	YBR200W	-100	-100
YBR200W-A YBR200W-A SGDID:S0028535, Chr II from 622978-623142, Uncharacterized ORF	YBR200W-A	-100	-100
YBR201W DER1 SGDID:S0000405, Chr II from 623572-624207, Verified ORF	YBR201W	-100	-100
YBR202W CDC47 SGDID:S0000406, Chr II from 625767-628304, Verified ORF	YBR202W	-100	-100
YBR204C YBR204C SGDID:S0000408, Chr II from 633376-632249, reverse complement, Uncharacterized ORF	YBR204C	-100	-100
YBR205W KTR3 SGDID:S0000409, Chr II from 633617-634831, Verified ORF	YBR205W	-100	-100
YBR207W FTH1 SGDID:S0000411, Chr II from 635141-636538, Verified ORF	YBR207W	-100	-100
YBR208C DUR1,2 SGDID:S0000412, Chr II from 642205-636698, reverse complement, Verified ORF	YBR208C	-100	-100
YBR210W ERV15 SGDID:S0000414, Chr II from 645545-645973, Verified ORF	YBR210W	-100	-100
YBR212W NGR1 SGDID:S0000416, Chr II from 647881-649899, Verified ORF	YBR212W	-100	-100
YBR213W MET8 SGDID:S0000417, Chr II from 650363-651187, Verified ORF	YBR213W	-100	-100
YBR214W SDS24 SGDID:S0000418, Chr II from 651410-652993, Verified ORF	YBR214W	-100	-100
YBR215W HPC2 SGDID:S0000419, Chr II from 653441-655312, Verified ORF	YBR215W	-100	-100
YBR216C YBP1 SGDID:S0000420, Chr II from 657595-655571, reverse complement, Verified ORF	YBR216C	-100	-100
YBR217W ATG12 SGDID:S0000421, Chr II from 657827-658387, Verified ORF	YBR217W	-100	-100
YBR218C PYC2 SGDID:S0000422, Chr II from 662244-658702, reverse complement, Verified ORF	YBR218C	-100	-100
YBR219C YBR219C SGDID:S0000423, Chr II from 663298-662998,662576-662494, reverse complement, Uncharacterized ORF	YBR219C	-100	-100
YBR220C YBR220C SGDID:S0000424, Chr II from 664672-662990, reverse complement, Uncharacterized ORF	YBR220C	-100	-100
YBR221W-A YBR221W-A SGDID:S0028817, Chr II from 666533-666637, Uncharacterized ORF	YBR221W-A	-100	-100
YBR222C PCS60 SGDID:S0000426, Chr II from 668346-666715, reverse complement, Verified ORF	YBR222C	-100	-100
YBR223C TDP1 SGDID:S0000427, Chr II from 670292-668658, reverse complement, Verified ORF	YBR223C	-100	-100
YBR225W YBR225W SGDID:S0000429, Chr II from 670622-673324, Uncharacterized ORF	YBR225W	-100	-100
YBR227C MCX1 SGDID:S0000431, Chr II from 675129-673567, reverse complement, Verified ORF	YBR227C	-100	-100
YBR228W SLX1 SGDID:S0000432, Chr II from 675308-676222, Verified ORF	YBR228W	-100	-100
YBR229C ROT2 SGDID:S0000433, Chr II from 679216-676352, reverse complement, Verified ORF	YBR229C	-100	-100
YBR230C YBR230C SGDID:S0000434, Chr II from 680045-680035,679937-679544, reverse complement, Uncharacterized ORF	YBR230C	-100	-100
YBR230W-A YBR230W-A SGDID:S0029722, Chr II from 680357-680557, Uncharacterized ORF	YBR230W-A	-100	-100
YBR231C SWC5 SGDID:S0000435, Chr II from 683085-682174, reverse complement, Uncharacterized ORF	YBR231C	-100	-100
YBR233W PBP2 SGDID:S0000437, Chr II from 683423-684664, Verified ORF	YBR233W	-100	-100
YBR233W-A DAD3 SGDID:S0007595, Chr II from 684972-685256, Verified ORF	YBR233W-A	-100	-100
YBR235W YBR235W SGDID:S0000439, Chr II from 686896-690258, Uncharacterized ORF	YBR235W	-100	-100
YBR237W PRP5 SGDID:S0000441, Chr II from 691964-694513, Verified ORF	YBR237W	-100	-100
YBR238C YBR238C SGDID:S0000442, Chr II from 697297-695102, reverse complement, Uncharacterized ORF	YBR238C	-100	-100
YBR239C YBR239C SGDID:S0000443, Chr II from 699938-698349, reverse complement, Uncharacterized ORF	YBR239C	-100	-100
YBR242W YBR242W SGDID:S0000446, Chr II from 704665-705381, Uncharacterized ORF	YBR242W	-100	-100
YBR243C ALG7 SGDID:S0000447, Chr II from 706788-705442, reverse complement, Verified ORF	YBR243C	-100	-100
YBR244W GPX2 SGDID:S0000448, Chr II from 707523-708011, Verified ORF	YBR244W	-100	-100
YBR245C ISW1 SGDID:S0000449, Chr II from 711534-708145, reverse complement, Verified ORF	YBR245C	-100	-100
YBR246W YBR246W SGDID:S0000450, Chr II from 711586-712749, Uncharacterized ORF	YBR246W	-100	-100
YBR248C HIS7 SGDID:S0000452, Chr II from 716460-714802, reverse complement, Verified ORF	YBR248C	-100	-100
YBR249C ARO4 SGDID:S0000453, Chr II from 717989-716877, reverse complement, Verified ORF	YBR249C	-100	-100
YBR251W MRPS5 SGDID:S0000455, Chr II from 721385-722308, Verified ORF	YBR251W	-100	-100
YBR252W DUT1 SGDID:S0000456, Chr II from 722606-723049, Verified ORF	YBR252W	-100	-100
YBR253W SRB6 SGDID:S0000457, Chr II from 723265-723630, Verified ORF	YBR253W	-100	-100
YBR254C TRS20 SGDID:S0000458, Chr II from 724258-723731, reverse complement, Verified ORF	YBR254C	-100	-100
YBR255C-A YBR255C-A SGDID:S0007649, Chr II from 727069-727007,726912-726613, reverse complement, Uncharacterized ORF	YBR255C-A	-100	-100
YBR256C RIB5 SGDID:S0000460, Chr II from 728097-727381, reverse complement, Verified ORF	YBR256C	-100	-100
YBR257W POP4 SGDID:S0000461, Chr II from 728880-729719, Verified ORF	YBR257W	-100	-100
YBR258C SHG1 SGDID:S0000462, Chr II from 730157-729729, reverse complement, Verified ORF	YBR258C	-100	-100
YBR260C RGD1 SGDID:S0000464, Chr II from 734634-732634, reverse complement, Verified ORF	YBR260C	-100	-100
YBR261C YBR261C SGDID:S0000465, Chr II from 735525-734827, reverse complement, Uncharacterized ORF	YBR261C	-100	-100
YBR262C FMP51 SGDID:S0000466, Chr II from 736035-735715, reverse complement, Uncharacterized ORF	YBR262C	-100	-100
YBR263W SHM1 SGDID:S0000467, Chr II from 736259-737731, Verified ORF	YBR263W	-100	-100
YBR264C YPT10 SGDID:S0000468, Chr II from 738364-737765, reverse complement, Verified ORF	YBR264C	-100	-100
YBR267W REI1 SGDID:S0000471, Chr II from 739836-741017, Verified ORF	YBR267W	-100	-100
YBR268W MRPL37 SGDID:S0000472, Chr II from 741294-741611, Verified ORF	YBR268W	-100	-100
YBR269C FMP21 SGDID:S0000473, Chr II from 742571-742155, reverse complement, Uncharacterized ORF	YBR269C	-100	-100
YBR270C YBR270C SGDID:S0000474, Chr II from 744393-742756, reverse complement, Uncharacterized ORF	YBR270C	-100	-100
YBR271W YBR271W SGDID:S0000475, Chr II from 744847-746106, Uncharacterized ORF	YBR271W	-100	-100
YBR272C HSM3 SGDID:S0000476, Chr II from 747798-746356, reverse complement, Verified ORF	YBR272C	-100	-100
YBR273C UBX7 SGDID:S0000477, Chr II from 749366-748056, reverse complement, Uncharacterized ORF	YBR273C	-100	-100
YBR274W CHK1 SGDID:S0000478, Chr II from 749589-751172, Verified ORF	YBR274W	-100	-100
YBR275C RIF1 SGDID:S0000479, Chr II from 757101-751351, reverse complement, Verified ORF	YBR275C	-100	-100
YBR278W DPB3 SGDID:S0000482, Chr II from 760290-760895, Verified ORF	YBR278W	-100	-100
YBR279W PAF1 SGDID:S0000483, Chr II from 761253-762590, Verified ORF	YBR279W	-100	-100
YBR280C YBR280C SGDID:S0000484, Chr II from 764693-762780, reverse complement, Uncharacterized ORF	YBR280C	-100	-100
YBR281C YBR281C SGDID:S0000485, Chr II from 767602-764966, reverse complement, Uncharacterized ORF	YBR281C	-100	-100
YBR282W MRPL27 SGDID:S0000486, Chr II from 768236-768676, Verified ORF	YBR282W	-100	-100
YBR283C SSH1 SGDID:S0000487, Chr II from 770411-768939, reverse complement, Verified ORF	YBR283C	-100	-100
YBR284W YBR284W SGDID:S0000488, Chr II from 771235-773628, Uncharacterized ORF	YBR284W	-100	-100
YBR285W YBR285W SGDID:S0000489, Chr II from 773918-774352, Uncharacterized ORF	YBR285W	-100	-100
YBR286W APE3 SGDID:S0000490, Chr II from 774618-776309, Verified ORF	YBR286W	-100	-100
YBR287W ZSP1 SGDID:S0000491, Chr II from 776567-777850, Uncharacterized ORF	YBR287W	-100	-100
YBR289W SNF5 SGDID:S0000493, Chr II from 779663-782380, Verified ORF	YBR289W	-100	-100
YBR290W BSD2 SGDID:S0000494, Chr II from 782587-783552, Verified ORF	YBR290W	-100	-100
YBR291C CTP1 SGDID:S0000495, Chr II from 784568-783669, reverse complement, Verified ORF	YBR291C	-100	-100
YBR294W SUL1 SGDID:S0000498, Chr II from 789230-791809, Verified ORF	YBR294W	-100	-100
YBR295W PCA1 SGDID:S0000499, Chr II from 792843-796493, Verified ORF	YBR295W	-100	-100
YBR296C PHO89 SGDID:S0000500, Chr II from 798516-796792, reverse complement, Verified ORF	YBR296C	-100	-100
YBR296C-A YBR296C-A SGDID:S0028605, Chr II from 800236-800117, reverse complement, Uncharacterized ORF	YBR296C-A	-100	-100
YBR297W MAL33 SGDID:S0000501, Chr II from 800517-801923, Verified ORF	YBR297W	-100	-100
YBR298C MAL31 SGDID:S0000502, Chr II from 804469-802625, reverse complement, Verified ORF	YBR298C	-100	-100
YBR298C-A YBR298C-A SGDID:S0028606, Chr II from 805250-805029, reverse complement, Uncharacterized ORF	YBR298C-A	-100	-100
YBR299W MAL32 SGDID:S0000503, Chr II from 805345-807099, Verified ORF	YBR299W	-100	-100
YBR301W DAN3 SGDID:S0000505, Chr II from 809051-809413, Verified ORF	YBR301W	-100	-100
YBR302C COS2 SGDID:S0000506, Chr II from 811473-810334, reverse complement, Verified ORF	YBR302C	-100	-100
YCL001W RER1 SGDID:S0000507, Chr III from 111913-112479, Verified ORF	YCL001W	-100	-100
YCL001W-A YCL001W-A SGDID:S0007221, Chr III from 113077-113538, Uncharacterized ORF	YCL001W-A	-100	-100
YCL001W-B YCL001W-B SGDID:S0007596, Chr III from 113767-114021, Uncharacterized ORF	YCL001W-B	-100	-100
YCL002C YCL002C SGDID:S0000508, Chr III from 111673-111632,111555-110842, reverse complement, Uncharacterized ORF	YCL002C	-100	-100
YCL005W YCL005W SGDID:S0000511, Chr III from 108020-108790, Uncharacterized ORF	YCL005W	-100	-100
YCL005W-A VMA9 SGDID:S0028508, Chr III from 107022-107032,107110-107190,107287-107416, Verified ORF	YCL005W-A	-100	-100
YCL008C STP22 SGDID:S0000514, Chr III from 106852-105695, reverse complement, Verified ORF	YCL008C	-100	-100
YCL009C ILV6 SGDID:S0000515, Chr III from 105547-104618, reverse complement, Verified ORF	YCL009C	-100	-100
YCL010C SGF29 SGDID:S0000516, Chr III from 104349-103570, reverse complement, Verified ORF	YCL010C	-100	-100
YCL011C GBP2 SGDID:S0000517, Chr III from 103357-102074, reverse complement, Verified ORF	YCL011C	-100	-100
YCL012C YCL012C SGDID:S0029705, Chr III from 101787-101700,101632-101316, reverse complement, Verified ORF	YCL012C	-100	-100
YCL016C DCC1 SGDID:S0000521, Chr III from 95762-94620, reverse complement, Verified ORF	YCL016C	-100	-100
YCL018W LEU2 SGDID:S0000523, Chr III from 91323-92417, Verified ORF	YCL018W	-100	-100
YCL019W YCL019W SGDID:S0000524, Chr III from 85101-86390,86392-90414, Ty ORF	YCL019W	-100	-100
YCL020W YCL020W SGDID:S0000525, Chr III from 85101-86417, Ty ORF	YCL020W	-100	-100
YCL021W-A YCL021W-A SGDID:S0007549, Chr III from 83619-83996, Uncharacterized ORF	YCL021W-A	-100	-100
YCL025C AGP1 SGDID:S0000530, Chr III from 77918-76131, reverse complement, Verified ORF	YCL025C	-100	-100
YCL026C-A FRM2 SGDID:S0000589, Chr III from 75285-74704, reverse complement, Verified ORF	YCL026C-A	-100	-100
YCL026C-B YCL026C-B SGDID:S0007548, Chr III from 73986-73405, reverse complement, Uncharacterized ORF	YCL026C-B	-100	-100
YCL027W FUS1 SGDID:S0000532, Chr III from 71803-73341, Verified ORF	YCL027W	-100	-100
YCL028W RNQ1 SGDID:S0000533, Chr III from 70150-71367, Verified ORF	YCL028W	-100	-100
YCL029C BIK1 SGDID:S0000534, Chr III from 69921-68599, reverse complement, Verified ORF	YCL029C	-100	-100
YCL030C HIS4 SGDID:S0000535, Chr III from 68333-65934, reverse complement, Verified ORF	YCL030C	-100	-100
YCL031C RRP7 SGDID:S0000536, Chr III from 65568-64675, reverse complement, Verified ORF	YCL031C	-100	-100
YCL032W STE50 SGDID:S0000537, Chr III from 63441-64481, Verified ORF	YCL032W	-100	-100
YCL033C YCL033C SGDID:S0000538, Chr III from 63282-62776, reverse complement, Uncharacterized ORF	YCL033C	-100	-100
YCL034W LSB5 SGDID:S0000539, Chr III from 61658-62722, Verified ORF	YCL034W	-100	-100
YCL035C GRX1 SGDID:S0000540, Chr III from 61173-60841, reverse complement, Verified ORF	YCL035C	-100	-100
YCL036W GFD2 SGDID:S0000541, Chr III from 59026-60726, Uncharacterized ORF	YCL036W	-100	-100
YCL037C SRO9 SGDID:S0000542, Chr III from 58678-57374, reverse complement, Verified ORF	YCL037C	-100	-100
YCL038C ATG22 SGDID:S0000543, Chr III from 56527-54941, reverse complement, Verified ORF	YCL038C	-100	-100
YCL039W GID7 SGDID:S0000544, Chr III from 52645-54882, Verified ORF	YCL039W	-100	-100
YCL040W GLK1 SGDID:S0000545, Chr III from 50838-52340, Verified ORF	YCL040W	-100	-100
YCL042W YCL042W SGDID:S0000547, Chr III from 50584-50943, Uncharacterized ORF	YCL042W	-100	-100
YCL043C PDI1 SGDID:S0000548, Chr III from 50221-48653, reverse complement, Verified ORF	YCL043C	-100	-100
YCL047C YCL047C SGDID:S0000552, Chr III from 44437-43661, reverse complement, Uncharacterized ORF	YCL047C	-100	-100
YCL048W YCL048W SGDID:S0000553, Chr III from 42165-43556, Uncharacterized ORF	YCL048W	-100	-100
YCL049C YCL049C SGDID:S0000554, Chr III from 40724-39786, reverse complement, Uncharacterized ORF	YCL049C	-100	-100
YCL050C APA1 SGDID:S0000555, Chr III from 38801-37836, reverse complement, Verified ORF	YCL050C	-100	-100
YCL052C PBN1 SGDID:S0000557, Chr III from 35393-34143, reverse complement, Verified ORF	YCL052C	-100	-100
YCL054W SPB1 SGDID:S0000559, Chr III from 31449-33974, Verified ORF	YCL054W	-100	-100
YCL055W KAR4 SGDID:S0000560, Chr III from 27929-28936, Verified ORF	YCL055W	-100	-100
YCL057C-A YCL057C-A SGDID:S0007547, Chr III from 24325-24032, reverse complement, Uncharacterized ORF	YCL057C-A	-100	-100
YCL057W PRD1 SGDID:S0000562, Chr III from 24768-26906, Verified ORF	YCL057W	-100	-100
YCL058C FYV5 SGDID:S0000563, Chr III from 23981-23523, reverse complement, Uncharacterized ORF	YCL058C	-100	-100
YCL059C KRR1 SGDID:S0000564, Chr III from 23379-22429, reverse complement, Verified ORF	YCL059C	-100	-100
YCL061C MRC1 SGDID:S0000566, Chr III from 22106-18816, reverse complement, Verified ORF	YCL061C	-100	-100
YCL063W VAC17 SGDID:S0000568, Chr III from 17290-18561, Verified ORF	YCL063W	-100	-100
YCL066W HMLALPHA1 SGDID:S0000571, Chr III from 13282-13809, Verified ORF	YCL066W	-100	-100
YCL067C HMLALPHA2 SGDID:S0000572, Chr III from 13018-12386, reverse complement, Verified ORF	YCL067C	-100	-100
YCL068C YCL068C SGDID:S0000573, Chr III from 12285-11503, reverse complement, Uncharacterized ORF	YCL068C	-100	-100
YCL069W YCL069W SGDID:S0000574, Chr III from 9706-11082, Uncharacterized ORF	YCL069W	-100	-100
YCL073C YCL073C SGDID:S0000575, Chr III from 8326-6479, reverse complement, Uncharacterized ORF	YCL073C	-100	-100
YCL075W YCL075W SGDID:S0000580, Chr III from 2126-2566, Pseudogene Ty ORF	YCL075W	-100	-100
YCR002C CDC10 SGDID:S0000595, Chr III from 118345-117377, reverse complement, Verified ORF	YCR002C	-100	-100
YCR003W MRPL32 SGDID:S0000596, Chr III from 118617-119168, Verified ORF	YCR003W	-100	-100
YCR004C YCP4 SGDID:S0000597, Chr III from 120315-119572, reverse complement, Verified ORF	YCR004C	-100	-100
YCR005C CIT2 SGDID:S0000598, Chr III from 122325-120943, reverse complement, Verified ORF	YCR005C	-100	-100
YCR007C YCR007C SGDID:S0000600, Chr III from 126727-126008, reverse complement, Uncharacterized ORF	YCR007C	-100	-100
YCR008W SAT4 SGDID:S0000601, Chr III from 128467-130278, Verified ORF	YCR008W	-100	-100
YCR009C RVS161 SGDID:S0000602, Chr III from 131539-130742, reverse complement, Verified ORF	YCR009C	-100	-100
YCR010C ADY2 SGDID:S0000603, Chr III from 133121-132270, reverse complement, Verified ORF	YCR010C	-100	-100
YCR011C ADP1 SGDID:S0000604, Chr III from 136870-133721, reverse complement, Verified ORF	YCR011C	-100	-100
YCR012W PGK1 SGDID:S0000605, Chr III from 137743-138993, Verified ORF	YCR012W	-100	-100
YCR014C POL4 SGDID:S0000607, Chr III from 140930-139182, reverse complement, Verified ORF	YCR014C	-100	-100
YCR015C YCR015C SGDID:S0000608, Chr III from 142167-141214, reverse complement, Uncharacterized ORF	YCR015C	-100	-100
YCR016W YCR016W SGDID:S0000609, Chr III from 143631-144503, Uncharacterized ORF	YCR016W	-100	-100
YCR017C CWH43 SGDID:S0000610, Chr III from 147631-144770, reverse complement, Verified ORF	YCR017C	-100	-100
YCR018C SRD1 SGDID:S0000611, Chr III from 148900-148235, reverse complement, Verified ORF	YCR018C	-100	-100
YCR020C PET18 SGDID:S0000613, Chr III from 154656-154009, reverse complement, Verified ORF	YCR020C	-100	-100
YCR020C-A MAK31 SGDID:S0000614, Chr III from 155093-154827, reverse complement, Verified ORF	YCR020C-A	-100	-100
YCR020W-B HTL1 SGDID:S0006439, Chr III from 155317-155553, Verified ORF	YCR020W-B	-100	-100
YCR021C HSP30 SGDID:S0000615, Chr III from 157102-156104, reverse complement, Verified ORF	YCR021C	-100	-100
YCR024C YCR024C SGDID:S0000618, Chr III from 162217-160739, reverse complement, Uncharacterized ORF	YCR024C	-100	-100
YCR024C-A PMP1 SGDID:S0000619, Chr III from 163062-162940, reverse complement, Verified ORF	YCR024C-A	-100	-100
YCR024C-B YCR024C-B SGDID:S0028818, Chr III from 162860-162594, reverse complement, Uncharacterized ORF	YCR024C-B	-100	-100
YCR026C YCR026C SGDID:S0000621, Chr III from 166334-164106, reverse complement, Uncharacterized ORF	YCR026C	-100	-100
YCR027C RHB1 SGDID:S0000622, Chr III from 167994-167365, reverse complement, Verified ORF	YCR027C	-100	-100
YCR028C FEN2 SGDID:S0000623, Chr III from 172419-170881, reverse complement, Verified ORF	YCR028C	-100	-100
YCR028C-A RIM1 SGDID:S0007222, Chr III from 173435-173194,173110-172945, reverse complement, Verified ORF	YCR028C-A	-100	-100
YCR030C SYP1 SGDID:S0000626, Chr III from 176433-173821, reverse complement, Verified ORF	YCR030C	-100	-100
YCR031C RPS14A SGDID:S0000627, Chr III from 178215-178209,177901-177495, reverse complement, Verified ORF	YCR031C	-100	-100
YCR033W SNT1 SGDID:S0000629, Chr III from 186484-190164, Verified ORF	YCR033W	-100	-100
YCR034W FEN1 SGDID:S0000630, Chr III from 190587-191630, Verified ORF	YCR034W	-100	-100
YCR035C RRP43 SGDID:S0000631, Chr III from 193013-191829, reverse complement, Verified ORF	YCR035C	-100	-100
YCR036W RBK1 SGDID:S0000632, Chr III from 193292-194293, Verified ORF	YCR036W	-100	-100
YCR037C PHO87 SGDID:S0000633, Chr III from 197180-194409, reverse complement, Verified ORF	YCR037C	-100	-100
YCR038C BUD5 SGDID:S0000634, Chr III from 199544-197616, reverse complement, Verified ORF	YCR038C	-100	-100
YCR039C MATALPHA2 SGDID:S0000635, Chr III from 200173-199541, reverse complement, Verified ORF	YCR039C	-100	-100
YCR040W MATALPHA1 SGDID:S0000636, Chr III from 200437-200964, Verified ORF	YCR040W	-100	-100
YCR042C TAF2 SGDID:S0000638, Chr III from 205392-201169, reverse complement, Verified ORF	YCR042C	-100	-100
YCR043C YCR043C SGDID:S0000639, Chr III from 206639-206256, reverse complement, Uncharacterized ORF	YCR043C	-100	-100
YCR044C PER1 SGDID:S0000640, Chr III from 207945-206872, reverse complement, Verified ORF	YCR044C	-100	-100
YCR045C YCR045C SGDID:S0000641, Chr III from 209605-208130, reverse complement, Uncharacterized ORF	YCR045C	-100	-100
YCR046C IMG1 SGDID:S0000642, Chr III from 210418-209909, reverse complement, Verified ORF	YCR046C	-100	-100
YCR047C BUD23 SGDID:S0000643, Chr III from 211540-210713, reverse complement, Verified ORF	YCR047C	-100	-100
YCR051W YCR051W SGDID:S0000647, Chr III from 214066-214734, Uncharacterized ORF	YCR051W	-100	-100
YCR052W RSC6 SGDID:S0000648, Chr III from 214989-216440, Verified ORF	YCR052W	-100	-100
YCR053W THR4 SGDID:S0000649, Chr III from 216692-218236, Verified ORF	YCR053W	-100	-100
YCR054C CTR86 SGDID:S0000650, Chr III from 220062-218371, reverse complement, Verified ORF	YCR054C	-100	-100
YCR057C PWP2 SGDID:S0000653, Chr III from 223223-220452, reverse complement, Verified ORF	YCR057C	-100	-100
YCR059C YIH1 SGDID:S0000655, Chr III from 224225-223449, reverse complement, Verified ORF	YCR059C	-100	-100
YCR060W TAH1 SGDID:S0000656, Chr III from 224394-224729, Uncharacterized ORF	YCR060W	-100	-100
YCR061W YCR061W SGDID:S0000657, Chr III from 225558-227453, Uncharacterized ORF	YCR061W	-100	-100
YCR063W BUD31 SGDID:S0000659, Chr III from 228313-228786, Verified ORF	YCR063W	-100	-100
YCR065W HCM1 SGDID:S0000661, Chr III from 229305-230999, Verified ORF	YCR065W	-100	-100
YCR067C SED4 SGDID:S0000663, Chr III from 236317-233120, reverse complement, Verified ORF	YCR067C	-100	-100
YCR068W ATG15 SGDID:S0000664, Chr III from 237209-238771, Verified ORF	YCR068W	-100	-100
YCR071C IMG2 SGDID:S0000667, Chr III from 240538-240098, reverse complement, Verified ORF	YCR071C	-100	-100
YCR073C SSK22 SGDID:S0000669, Chr III from 246579-242584, reverse complement, Verified ORF	YCR073C	-100	-100
YCR073W-A SOL2 SGDID:S0000718, Chr III from 246959-247906, Verified ORF	YCR073W-A	-100	-100
YCR075C ERS1 SGDID:S0000671, Chr III from 248811-248029, reverse complement, Verified ORF	YCR075C	-100	-100
YCR075W-A YCR075W-A SGDID:S0028519, Chr III from 248971-249198, Uncharacterized ORF	YCR075W-A	-100	-100
YCR076C YCR076C SGDID:S0000672, Chr III from 250041-249289, reverse complement, Uncharacterized ORF	YCR076C	-100	-100
YCR077C PAT1 SGDID:S0000673, Chr III from 252624-250234, reverse complement, Verified ORF	YCR077C	-100	-100
YCR079W YCR079W SGDID:S0002133, Chr III from 252841-254169, Uncharacterized ORF	YCR079W	-100	-100
YCR082W AHC2 SGDID:S0000678, Chr III from 258879-259265, Uncharacterized ORF	YCR082W	-100	-100
YCR083W TRX3 SGDID:S0000679, Chr III from 259574-259957, Verified ORF	YCR083W	-100	-100
YCR084C TUP1 SGDID:S0000680, Chr III from 262448-260307, reverse complement, Verified ORF	YCR084C	-100	-100
YCR086W CSM1 SGDID:S0000682, Chr III from 263388-263960, Verified ORF	YCR086W	-100	-100
YCR087C-A YCR087C-A SGDID:S0007223, Chr III from 264463-264002, reverse complement, Uncharacterized ORF	YCR087C-A	-100	-100
YCR088W ABP1 SGDID:S0000684, Chr III from 265064-266842, Verified ORF	YCR088W	-100	-100
YCR089W FIG2 SGDID:S0000685, Chr III from 267430-272259, Verified ORF	YCR089W	-100	-100
YCR090C YCR090C SGDID:S0000686, Chr III from 272859-272311, reverse complement, Uncharacterized ORF	YCR090C	-100	-100
YCR092C MSH3 SGDID:S0000688, Chr III from 279903-276760, reverse complement, Verified ORF	YCR092C	-100	-100
YCR094W CDC50 SGDID:S0000690, Chr III from 286758-287933, Verified ORF	YCR094W	-100	-100
YCR095C YCR095C SGDID:S0000691, Chr III from 289254-288166, reverse complement, Uncharacterized ORF	YCR095C	-100	-100
YCR095W-A YCR095W-A SGDID:S0029724, Chr III from 289635-289793, Uncharacterized ORF	YCR095W-A	-100	-100
YCR096C HMRA2 SGDID:S0000692, Chr III from 293534-293175, reverse complement, Verified ORF	YCR096C	-100	-100
YCR097W HMRA1 SGDID:S0000694, Chr III from 293831-293935,293990-294235,294288-294317, Verified ORF	YCR097W	-100	-100
YCR098C GIT1 SGDID:S0000695, Chr III from 298601-297045, reverse complement, Verified ORF	YCR098C	-100	-100
YCR099C YCR099C SGDID:S0000696, Chr III from 301295-300828, reverse complement, Uncharacterized ORF	YCR099C	-100	-100
YCR100C YCR100C SGDID:S0000697, Chr III from 302217-301267, reverse complement, Uncharacterized ORF	YCR100C	-100	-100
YCR101C YCR101C SGDID:S0000698, Chr III from 303026-302478, reverse complement, Uncharacterized ORF	YCR101C	-100	-100
YCR102C YCR102C SGDID:S0000699, Chr III from 305463-304357, reverse complement, Uncharacterized ORF	YCR102C	-100	-100
YCR104W PAU3 SGDID:S0000701, Chr III from 307797-308171, Verified ORF	YCR104W	-100	-100
YCR106W RDS1 SGDID:S0000703, Chr III from 310954-313452, Verified ORF	YCR106W	-100	-100
YCR107W AAD3 SGDID:S0000704, Chr III from 313886-314977, Verified ORF	YCR107W	-100	-100
YCR108C YCR108C SGDID:S0028536, Chr III from 316184-315993, reverse complement, Uncharacterized ORF	YCR108C	-100	-100
YDL001W RMD1 SGDID:S0002159, Chr IV from 447981-449273, Verified ORF	YDL001W	-100	-100
YDL002C NHP10 SGDID:S0002160, Chr IV from 447575-446964, reverse complement, Verified ORF	YDL002C	-100	-100
YDL003W MCD1 SGDID:S0002161, Chr IV from 444680-446380, Verified ORF	YDL003W	-100	-100
YDL004W ATP16 SGDID:S0002162, Chr IV from 443026-443508, Verified ORF	YDL004W	-100	-100
YDL005C MED2 SGDID:S0002163, Chr IV from 442306-441011, reverse complement, Verified ORF	YDL005C	-100	-100
YDL006W PTC1 SGDID:S0002164, Chr IV from 439906-440751, Verified ORF	YDL006W	-100	-100
YDL008W APC11 SGDID:S0002166, Chr IV from 433494-433991, Verified ORF	YDL008W	-100	-100
YDL010W YDL010W SGDID:S0002168, Chr IV from 432327-433022, Uncharacterized ORF	YDL010W	-100	-100
YDL012C YDL012C SGDID:S0002170, Chr IV from 431514-431470,431383-431105, reverse complement, Uncharacterized ORF	YDL012C	-100	-100
YDL013W HEX3 SGDID:S0002171, Chr IV from 429064-430923, Verified ORF	YDL013W	-100	-100
YDL014W NOP1 SGDID:S0002172, Chr IV from 427361-428344, Verified ORF	YDL014W	-100	-100
YDL017W CDC7 SGDID:S0002175, Chr IV from 424206-425729, Verified ORF	YDL017W	-100	-100
YDL018C ERP3 SGDID:S0002176, Chr IV from 423507-422830, reverse complement, Verified ORF	YDL018C	-100	-100
YDL019C OSH2 SGDID:S0002177, Chr IV from 421511-417660, reverse complement, Verified ORF	YDL019C	-100	-100
YDL021W GPM2 SGDID:S0002179, Chr IV from 413950-414885, Verified ORF	YDL021W	-100	-100
YDL028C MPS1 SGDID:S0002186, Chr IV from 403288-400994, reverse complement, Verified ORF	YDL028C	-100	-100
YDL031W DBP10 SGDID:S0002189, Chr IV from 394214-397201, Verified ORF	YDL031W	-100	-100
YDL033C MTO2 SGDID:S0002191, Chr IV from 393909-392656, reverse complement, Uncharacterized ORF	YDL033C	-100	-100
YDL036C YDL036C SGDID:S0002194, Chr IV from 388898-387510, reverse complement, Uncharacterized ORF	YDL036C	-100	-100
YDL037C BSC1 SGDID:S0002195, Chr IV from 385584-384598, reverse complement, Verified ORF	YDL037C	-100	-100
YDL038C YDL038C SGDID:S0002196, Chr IV from 384078-382327, reverse complement, Uncharacterized ORF	YDL038C	-100	-100
YDL039C PRM7 SGDID:S0002197, Chr IV from 382330-381983, reverse complement, Verified ORF	YDL039C	-100	-100
YDL040C NAT1 SGDID:S0002198, Chr IV from 381435-378871, reverse complement, Verified ORF	YDL040C	-100	-100
YDL042C SIR2 SGDID:S0002200, Chr IV from 378442-376754, reverse complement, Verified ORF	YDL042C	-100	-100
YDL043C PRP11 SGDID:S0002201, Chr IV from 376477-375677, reverse complement, Verified ORF	YDL043C	-100	-100
YDL045W-A MRP10 SGDID:S0006430, Chr IV from 372245-372532, Verified ORF	YDL045W-A	-100	-100
YDL046W NPC2 SGDID:S0002204, Chr IV from 371237-371758, Uncharacterized ORF	YDL046W	-100	-100
YDL048C STP4 SGDID:S0002206, Chr IV from 368211-366739, reverse complement, Verified ORF	YDL048C	-100	-100
YDL049C KNH1 SGDID:S0002207, Chr IV from 365874-365068, reverse complement, Verified ORF	YDL049C	-100	-100
YDL052C SLC1 SGDID:S0002210, Chr IV from 363583-362672, reverse complement, Verified ORF	YDL052C	-100	-100
YDL053C PBP4 SGDID:S0002211, Chr IV from 362256-361699, reverse complement, Uncharacterized ORF	YDL053C	-100	-100
YDL055C PSA1 SGDID:S0002213, Chr IV from 356759-355674, reverse complement, Verified ORF	YDL055C	-100	-100
YDL056W MBP1 SGDID:S0002214, Chr IV from 352877-355378, Verified ORF	YDL056W	-100	-100
YDL057W YDL057W SGDID:S0002215, Chr IV from 351434-352420, Uncharacterized ORF	YDL057W	-100	-100
YDL059C RAD59 SGDID:S0002217, Chr IV from 344953-344237, reverse complement, Verified ORF	YDL059C	-100	-100
YDL060W TSR1 SGDID:S0002218, Chr IV from 341619-343985, Verified ORF	YDL060W	-100	-100
YDL061C RPS29B SGDID:S0002219, Chr IV from 340798-340628, reverse complement, Verified ORF	YDL061C	-100	-100
YDL063C YDL063C SGDID:S0002221, Chr IV from 340134-338272, reverse complement, Uncharacterized ORF	YDL063C	-100	-100
YDL064W UBC9 SGDID:S0002222, Chr IV from 337487-337524,337635-338070, Verified ORF	YDL064W	-100	-100
YDL065C PEX19 SGDID:S0002223, Chr IV from 337301-336249, reverse complement, Verified ORF	YDL065C	-100	-100
YDL066W IDP1 SGDID:S0002224, Chr IV from 334835-336121, Verified ORF	YDL066W	-100	-100
YDL067C COX9 SGDID:S0002225, Chr IV from 334396-334217, reverse complement, Verified ORF	YDL067C	-100	-100
YDL069C CBS1 SGDID:S0002227, Chr IV from 333810-333121, reverse complement, Verified ORF	YDL069C	-100	-100
YDL070W BDF2 SGDID:S0002228, Chr IV from 331025-332941, Verified ORF	YDL070W	-100	-100
YDL072C YET3 SGDID:S0002230, Chr IV from 330447-329836, reverse complement, Uncharacterized ORF	YDL072C	-100	-100
YDL074C BRE1 SGDID:S0002232, Chr IV from 326149-324047, reverse complement, Verified ORF	YDL074C	-100	-100
YDL075W RPL31A SGDID:S0002233, Chr IV from 322226-322282,322704-322988, Verified ORF	YDL075W	-100	-100
YDL076C RXT3 SGDID:S0002234, Chr IV from 321552-320668, reverse complement, Uncharacterized ORF	YDL076C	-100	-100
YDL077C VAM6 SGDID:S0002235, Chr IV from 320120-316971, reverse complement, Verified ORF	YDL077C	-100	-100
YDL078C MDH3 SGDID:S0002236, Chr IV from 316388-315357, reverse complement, Verified ORF	YDL078C	-100	-100
YDL079C MRK1 SGDID:S0002237, Chr IV from 314748-314337,314044-312951, reverse complement, Verified ORF	YDL079C	-100	-100
YDL080C THI3 SGDID:S0002238, Chr IV from 312471-310642, reverse complement, Verified ORF	YDL080C	-100	-100
YDL081C RPP1A SGDID:S0002239, Chr IV from 310122-309802, reverse complement, Verified ORF	YDL081C	-100	-100
YDL082W RPL13A SGDID:S0002240, Chr IV from 308424-308427,308793-309388, Verified ORF	YDL082W	-100	-100
YDL083C RPS16B SGDID:S0002241, Chr IV from 307789-307766,307333-306926, reverse complement, Verified ORF	YDL083C	-100	-100
YDL084W SUB2 SGDID:S0002242, Chr IV from 305237-306577, Verified ORF	YDL084W	-100	-100
YDL085C-A YDL085C-A SGDID:S0007588, Chr IV from 302670-302464, reverse complement, Uncharacterized ORF	YDL085C-A	-100	-100
YDL085W NDE2 SGDID:S0002243, Chr IV from 303211-304848, Verified ORF	YDL085W	-100	-100
YDL086W YDL086W SGDID:S0002244, Chr IV from 301413-302234, Uncharacterized ORF	YDL086W	-100	-100
YDL087C LUC7 SGDID:S0002245, Chr IV from 300999-300214, reverse complement, Verified ORF	YDL087C	-100	-100
YDL088C ASM4 SGDID:S0002246, Chr IV from 300003-298417, reverse complement, Verified ORF	YDL088C	-100	-100
YDL089W YDL089W SGDID:S0002247, Chr IV from 296820-298274, Uncharacterized ORF	YDL089W	-100	-100
YDL090C RAM1 SGDID:S0002248, Chr IV from 296329-295034, reverse complement, Verified ORF	YDL090C	-100	-100
YDL091C UBX3 SGDID:S0002249, Chr IV from 294759-293392, reverse complement, Uncharacterized ORF	YDL091C	-100	-100
YDL092W SRP14 SGDID:S0002250, Chr IV from 292781-293221, Verified ORF	YDL092W	-100	-100
YDL093W PMT5 SGDID:S0002251, Chr IV from 289909-292140, Verified ORF	YDL093W	-100	-100
YDL095W PMT1 SGDID:S0002253, Chr IV from 287059-289512, Verified ORF	YDL095W	-100	-100
YDL097C RPN6 SGDID:S0002255, Chr IV from 286695-285391, reverse complement, Verified ORF	YDL097C	-100	-100
YDL098C SNU23 SGDID:S0002256, Chr IV from 285165-284581, reverse complement, Verified ORF	YDL098C	-100	-100
YDL099W YDL099W SGDID:S0002257, Chr IV from 283419-284444, Uncharacterized ORF	YDL099W	-100	-100
YDL100C ARR4 SGDID:S0002258, Chr IV from 283176-282112, reverse complement, Verified ORF	YDL100C	-100	-100
YDL101C DUN1 SGDID:S0002259, Chr IV from 281848-280307, reverse complement, Verified ORF	YDL101C	-100	-100
YDL102W CDC2 SGDID:S0002260, Chr IV from 276872-280165, Verified ORF	YDL102W	-100	-100
YDL103C QRI1 SGDID:S0002261, Chr IV from 276581-275148, reverse complement, Verified ORF	YDL103C	-100	-100
YDL104C QRI7 SGDID:S0002262, Chr IV from 274876-273653, reverse complement, Verified ORF	YDL104C	-100	-100
YDL105W QRI2 SGDID:S0002263, Chr IV from 272389-273597, Verified ORF	YDL105W	-100	-100
YDL106C PHO2 SGDID:S0002264, Chr IV from 271901-270222, reverse complement, Verified ORF	YDL106C	-100	-100
YDL107W MSS2 SGDID:S0002265, Chr IV from 268921-269976, Verified ORF	YDL107W	-100	-100
YDL108W KIN28 SGDID:S0002266, Chr IV from 267698-267725,267807-268699, Verified ORF	YDL108W	-100	-100
YDL110C YDL110C SGDID:S0002268, Chr IV from 264964-264512, reverse complement, Uncharacterized ORF	YDL110C	-100	-100
YDL111C RRP42 SGDID:S0002269, Chr IV from 264110-263313, reverse complement, Verified ORF	YDL111C	-100	-100
YDL113C ATG20 SGDID:S0002271, Chr IV from 258555-256633, reverse complement, Verified ORF	YDL113C	-100	-100
YDL115C IWR1 SGDID:S0002273, Chr IV from 254717-253995, reverse complement, Uncharacterized ORF	YDL115C	-100	-100
YDL116W NUP84 SGDID:S0002274, Chr IV from 251566-253746, Verified ORF	YDL116W	-100	-100
YDL117W CYK3 SGDID:S0002275, Chr IV from 248581-251238, Verified ORF	YDL117W	-100	-100
YDL119C YDL119C SGDID:S0002277, Chr IV from 247612-246689, reverse complement, Uncharacterized ORF	YDL119C	-100	-100
YDL120W YFH1 SGDID:S0002278, Chr IV from 245923-246447, Verified ORF	YDL120W	-100	-100
YDL121C YDL121C SGDID:S0002279, Chr IV from 245582-245133, reverse complement, Uncharacterized ORF	YDL121C	-100	-100
YDL124W YDL124W SGDID:S0002282, Chr IV from 240259-241197, Uncharacterized ORF	YDL124W	-100	-100
YDL125C HNT1 SGDID:S0002283, Chr IV from 239606-239510,239398-239019, reverse complement, Verified ORF	YDL125C	-100	-100
YDL126C CDC48 SGDID:S0002284, Chr IV from 238664-236157, reverse complement, Verified ORF	YDL126C	-100	-100
YDL128W VCX1 SGDID:S0002286, Chr IV from 232652-233887, Verified ORF	YDL128W	-100	-100
YDL129W YDL129W SGDID:S0002287, Chr IV from 231024-231899, Uncharacterized ORF	YDL129W	-100	-100
YDL130W RPP1B SGDID:S0002288, Chr IV from 229906-230019,230321-230527, Verified ORF	YDL130W	-100	-100
YDL130W-A STF1 SGDID:S0007232, Chr IV from 229171-229431, Verified ORF	YDL130W-A	-100	-100
YDL131W LYS21 SGDID:S0002289, Chr IV from 227393-228715, Verified ORF	YDL131W	-100	-100
YDL132W CDC53 SGDID:S0002290, Chr IV from 224304-226751, Verified ORF	YDL132W	-100	-100
YDL133C-A RPL41B SGDID:S0002293, Chr IV from 221801-221724, reverse complement, Verified ORF	YDL133C-A	-100	-100
YDL133W YDL133W SGDID:S0002291, Chr IV from 222427-223740, Uncharacterized ORF	YDL133W	-100	-100
YDL134C PPH21 SGDID:S0002292, Chr IV from 220771-219662, reverse complement, Verified ORF	YDL134C	-100	-100
YDL135C RDI1 SGDID:S0002294, Chr IV from 219288-218680, reverse complement, Verified ORF	YDL135C	-100	-100
YDL136W RPL35B SGDID:S0002295, Chr IV from 217600-217602,218008-218367, Verified ORF	YDL136W	-100	-100
YDL137W ARF2 SGDID:S0002296, Chr IV from 216529-217074, Verified ORF	YDL137W	-100	-100
YDL138W RGT2 SGDID:S0002297, Chr IV from 213352-215643, Verified ORF	YDL138W	-100	-100
YDL140C RPO21 SGDID:S0002299, Chr IV from 210562-205361, reverse complement, Verified ORF	YDL140C	-100	-100
YDL141W BPL1 SGDID:S0002300, Chr IV from 203040-205112, Verified ORF	YDL141W	-100	-100
YDL142C CRD1 SGDID:S0002301, Chr IV from 202571-201720, reverse complement, Verified ORF	YDL142C	-100	-100
YDL143W CCT4 SGDID:S0002302, Chr IV from 199997-201583, Verified ORF	YDL143W	-100	-100
YDL144C YDL144C SGDID:S0002303, Chr IV from 199733-198663, reverse complement, Uncharacterized ORF	YDL144C	-100	-100
YDL145C COP1 SGDID:S0002304, Chr IV from 198177-194572, reverse complement, Verified ORF	YDL145C	-100	-100
YDL146W YDL146W SGDID:S0002305, Chr IV from 192751-194226, Uncharacterized ORF	YDL146W	-100	-100
YDL147W RPN5 SGDID:S0002306, Chr IV from 190925-192262, Verified ORF	YDL147W	-100	-100
YDL148C NOP14 SGDID:S0002307, Chr IV from 190587-188155, reverse complement, Verified ORF	YDL148C	-100	-100
YDL150W RPC53 SGDID:S0002309, Chr IV from 183344-184612, Verified ORF	YDL150W	-100	-100
YDL154W MSH5 SGDID:S0002313, Chr IV from 178335-181040, Verified ORF	YDL154W	-100	-100
YDL155W CLB3 SGDID:S0002314, Chr IV from 176774-178057, Verified ORF	YDL155W	-100	-100
YDL156W YDL156W SGDID:S0002315, Chr IV from 174919-176487, Uncharacterized ORF	YDL156W	-100	-100
YDL157C YDL157C SGDID:S0002316, Chr IV from 174589-174233, reverse complement, Uncharacterized ORF	YDL157C	-100	-100
YDL159W STE7 SGDID:S0002318, Chr IV from 172482-174029, Verified ORF	YDL159W	-100	-100
YDL159W-A YDL159W-A SGDID:S0007599, Chr IV from 172183-172314, Uncharacterized ORF	YDL159W-A	-100	-100
YDL160C-A YDL160C-A SGDID:S0028520, Chr IV from 169609-169367, reverse complement, Uncharacterized ORF	YDL160C-A	-100	-100
YDL164C CDC9 SGDID:S0002323, Chr IV from 167255-164988, reverse complement, Verified ORF	YDL164C	-100	-100
YDL165W CDC36 SGDID:S0002324, Chr IV from 164291-164866, Verified ORF	YDL165W	-100	-100
YDL166C FAP7 SGDID:S0002325, Chr IV from 164043-163450, reverse complement, Verified ORF	YDL166C	-100	-100
YDL168W SFA1 SGDID:S0002327, Chr IV from 159605-160765, Verified ORF	YDL168W	-100	-100
YDL169C UGX2 SGDID:S0002328, Chr IV from 158736-158065, reverse complement, Verified ORF	YDL169C	-100	-100
YDL170W UGA3 SGDID:S0002329, Chr IV from 156319-157905, Verified ORF	YDL170W	-100	-100
YDL173W YDL173W SGDID:S0002332, Chr IV from 148192-149079, Uncharacterized ORF	YDL173W	-100	-100
YDL174C DLD1 SGDID:S0002333, Chr IV from 147590-145827, reverse complement, Verified ORF	YDL174C	-100	-100
YDL175C AIR2 SGDID:S0002334, Chr IV from 145519-144485, reverse complement, Verified ORF	YDL175C	-100	-100
YDL176W YDL176W SGDID:S0002335, Chr IV from 142098-144224, Uncharacterized ORF	YDL176W	-100	-100
YDL177C YDL177C SGDID:S0002336, Chr IV from 141722-141210, reverse complement, Uncharacterized ORF	YDL177C	-100	-100
YDL180W YDL180W SGDID:S0002339, Chr IV from 135897-137540, Uncharacterized ORF	YDL180W	-100	-100
YDL181W INH1 SGDID:S0002340, Chr IV from 135180-135437, Verified ORF	YDL181W	-100	-100
YDL182W LYS20 SGDID:S0002341, Chr IV from 133438-134724, Verified ORF	YDL182W	-100	-100
YDL183C YDL183C SGDID:S0002342, Chr IV from 131834-130872, reverse complement, Uncharacterized ORF	YDL183C	-100	-100
YDL184C RPL41A SGDID:S0002343, Chr IV from 130485-130408, reverse complement, Verified ORF	YDL184C	-100	-100
YDL186W YDL186W SGDID:S0002345, Chr IV from 125617-126450, Uncharacterized ORF	YDL186W	-100	-100
YDL188C PPH22 SGDID:S0002347, Chr IV from 124999-123866, reverse complement, Verified ORF	YDL188C	-100	-100
YDL189W RBS1 SGDID:S0002348, Chr IV from 122217-123590, Verified ORF	YDL189W	-100	-100
YDL190C UFD2 SGDID:S0002349, Chr IV from 121593-118708, reverse complement, Verified ORF	YDL190C	-100	-100
YDL191W RPL35A SGDID:S0002350, Chr IV from 117665-117667,118159-118518, Verified ORF	YDL191W	-100	-100
YDL192W ARF1 SGDID:S0002351, Chr IV from 116322-116867, Verified ORF	YDL192W	-100	-100
YDL193W YDL193W SGDID:S0002352, Chr IV from 114673-115800, Uncharacterized ORF	YDL193W	-100	-100
YDL194W SNF3 SGDID:S0002353, Chr IV from 111581-114235, Verified ORF	YDL194W	-100	-100
YDL202W MRPL11 SGDID:S0002361, Chr IV from 98476-99225, Verified ORF	YDL202W	-100	-100
YDL203C YDL203C SGDID:S0002362, Chr IV from 97954-96083, reverse complement, Uncharacterized ORF	YDL203C	-100	-100
YDL204W RTN2 SGDID:S0002363, Chr IV from 94606-95787, Verified ORF	YDL204W	-100	-100
YDL206W YDL206W SGDID:S0002365, Chr IV from 90177-92465, Uncharacterized ORF	YDL206W	-100	-100
YDL207W GLE1 SGDID:S0002366, Chr IV from 88249-89865, Verified ORF	YDL207W	-100	-100
YDL208W NHP2 SGDID:S0002367, Chr IV from 87462-87983, Verified ORF	YDL208W	-100	-100
YDL209C CWC2 SGDID:S0002368, Chr IV from 87227-86208, reverse complement, Verified ORF	YDL209C	-100	-100
YDL210W UGA4 SGDID:S0002369, Chr IV from 84271-85986, Verified ORF	YDL210W	-100	-100
YDL211C YDL211C SGDID:S0002370, Chr IV from 80413-79295, reverse complement, Uncharacterized ORF	YDL211C	-100	-100
YDL212W SHR3 SGDID:S0002371, Chr IV from 78427-79059, Verified ORF	YDL212W	-100	-100
YDL216C RRI1 SGDID:S0002375, Chr IV from 70365-68998, reverse complement, Verified ORF	YDL216C	-100	-100
YDL217C TIM22 SGDID:S0002376, Chr IV from 68607-67984, reverse complement, Verified ORF	YDL217C	-100	-100
YDL218W YDL218W SGDID:S0002377, Chr IV from 66494-67447, Uncharacterized ORF	YDL218W	-100	-100
YDL219W DTD1 SGDID:S0002378, Chr IV from 65243-65307,65379-65766, Verified ORF	YDL219W	-100	-100
YDL220C CDC13 SGDID:S0002379, Chr IV from 65019-62245, reverse complement, Verified ORF	YDL220C	-100	-100
YDL222C FMP45 SGDID:S0002381, Chr IV from 61802-60873, reverse complement, Uncharacterized ORF	YDL222C	-100	-100
YDL224C WHI4 SGDID:S0002383, Chr IV from 56347-54398, reverse complement, Verified ORF	YDL224C	-100	-100
YDL226C GCS1 SGDID:S0002385, Chr IV from 52174-51116, reverse complement, Verified ORF	YDL226C	-100	-100
YDL227C HO SGDID:S0002386, Chr IV from 48032-46272, reverse complement, Verified ORF	YDL227C	-100	-100
YDL229W SSB1 SGDID:S0002388, Chr IV from 44066-45907, Verified ORF	YDL229W	-100	-100
YDL231C BRE4 SGDID:S0002390, Chr IV from 42245-38868, reverse complement, Verified ORF	YDL231C	-100	-100
YDL232W OST4 SGDID:S0002391, Chr IV from 38488-38598, Verified ORF	YDL232W	-100	-100
YDL233W YDL233W SGDID:S0002392, Chr IV from 36798-38174, Uncharacterized ORF	YDL233W	-100	-100
YDL234C GYP7 SGDID:S0002393, Chr IV from 36478-34238, reverse complement, Verified ORF	YDL234C	-100	-100
YDL235C YPD1 SGDID:S0002394, Chr IV from 33918-33415, reverse complement, Verified ORF	YDL235C	-100	-100
YDL237W YDL237W SGDID:S0002396, Chr IV from 30657-31829, Uncharacterized ORF	YDL237W	-100	-100
YDL239C ADY3 SGDID:S0002398, Chr IV from 28775-26403, reverse complement, Verified ORF	YDL239C	-100	-100
YDL240W LRG1 SGDID:S0002399, Chr IV from 22823-25876, Verified ORF	YDL240W	-100	-100
YDL241W YDL241W SGDID:S0002400, Chr IV from 20635-21006, Uncharacterized ORF	YDL241W	-100	-100
YDL243C AAD4 SGDID:S0002402, Chr IV from 18566-17577, reverse complement, Verified ORF	YDL243C	-100	-100
YDL244W THI13 SGDID:S0002403, Chr IV from 16204-17226, Verified ORF	YDL244W	-100	-100
YDL245C HXT15 SGDID:S0002404, Chr IV from 13360-11657, reverse complement, Verified ORF	YDL245C	-100	-100
YDL246C SOR2 SGDID:S0002405, Chr IV from 9756-8683, reverse complement, Uncharacterized ORF	YDL246C	-100	-100
YDL247W MPH2 SGDID:S0002406, Chr IV from 5985-7814, Verified ORF	YDL247W	-100	-100
YDL248W COS7 SGDID:S0002407, Chr IV from 1802-2953, Verified ORF	YDL248W	-100	-100
YDR001C NTH1 SGDID:S0002408, Chr IV from 452472-450217, reverse complement, Verified ORF	YDR001C	-100	-100
YDR002W YRB1 SGDID:S0002409, Chr IV from 453042-453647, Verified ORF	YDR002W	-100	-100
YDR003W RCR2 SGDID:S0002410, Chr IV from 454119-454751, Uncharacterized ORF	YDR003W	-100	-100
YDR003W-A YDR003W-A SGDID:S0028819, Chr IV from 454779-454901, Uncharacterized ORF	YDR003W-A	-100	-100
YDR004W RAD57 SGDID:S0002411, Chr IV from 455198-456580, Verified ORF	YDR004W	-100	-100
YDR005C MAF1 SGDID:S0002412, Chr IV from 458100-458095,458014-456833, reverse complement, Verified ORF	YDR005C	-100	-100
YDR006C SOK1 SGDID:S0002413, Chr IV from 461244-458539, reverse complement, Verified ORF	YDR006C	-100	-100
YDR007W TRP1 SGDID:S0002414, Chr IV from 461839-462513, Verified ORF	YDR007W	-100	-100
YDR012W RPL4B SGDID:S0002419, Chr IV from 471850-472938, Verified ORF	YDR012W	-100	-100
YDR013W PSF1 SGDID:S0002420, Chr IV from 473154-473780, Verified ORF	YDR013W	-100	-100
YDR016C DAD1 SGDID:S0002423, Chr IV from 478754-478470, reverse complement, Verified ORF	YDR016C	-100	-100
YDR018C YDR018C SGDID:S0002425, Chr IV from 483856-482666, reverse complement, Uncharacterized ORF	YDR018C	-100	-100
YDR019C GCV1 SGDID:S0002426, Chr IV from 485361-484159, reverse complement, Verified ORF	YDR019C	-100	-100
YDR020C YDR020C SGDID:S0002427, Chr IV from 486440-485742, reverse complement, Uncharacterized ORF	YDR020C	-100	-100
YDR021W FAL1 SGDID:S0002428, Chr IV from 486800-487999, Verified ORF	YDR021W	-100	-100
YDR022C CIS1 SGDID:S0002429, Chr IV from 488658-488068, reverse complement, Verified ORF	YDR022C	-100	-100
YDR023W SES1 SGDID:S0002430, Chr IV from 489504-490892, Verified ORF	YDR023W	-100	-100
YDR025W RPS11A SGDID:S0002432, Chr IV from 491511-491555,491895-492320, Verified ORF	YDR025W	-100	-100
YDR027C VPS54 SGDID:S0002434, Chr IV from 497314-494645, reverse complement, Verified ORF	YDR027C	-100	-100
YDR028C REG1 SGDID:S0002435, Chr IV from 500875-497831, reverse complement, Verified ORF	YDR028C	-100	-100
YDR031W YDR031W SGDID:S0002438, Chr IV from 503494-503859, Uncharacterized ORF	YDR031W	-100	-100
YDR032C PST2 SGDID:S0002439, Chr IV from 504691-504095, reverse complement, Verified ORF	YDR032C	-100	-100
YDR033W MRH1 SGDID:S0002440, Chr IV from 508143-509105, Verified ORF	YDR033W	-100	-100
YDR034C-A YDR034C-A SGDID:S0007233, Chr IV from 520688-520512, reverse complement, Uncharacterized ORF	YDR034C-A	-100	-100
YDR034C-C YDR034C-C SGDID:S0007344, Chr IV from 519352-518036, reverse complement, Ty ORF	YDR034C-C	-100	-100
YDR034C-D YDR034C-D SGDID:S0007345, Chr IV from 519352-518060,518058-514039, reverse complement, Ty ORF	YDR034C-D	-100	-100
YDR034W-B YDR034W-B SGDID:S0007234, Chr IV from 521310-521465, Uncharacterized ORF	YDR034W-B	-100	-100
YDR035W ARO3 SGDID:S0002442, Chr IV from 521812-522924, Verified ORF	YDR035W	-100	-100
YDR036C EHD3 SGDID:S0002443, Chr IV from 524709-523207, reverse complement, Verified ORF	YDR036C	-100	-100
YDR038C ENA5 SGDID:S0002445, Chr IV from 530693-527418, reverse complement, Verified ORF	YDR038C	-100	-100
YDR039C ENA2 SGDID:S0002446, Chr IV from 534578-531303, reverse complement, Verified ORF	YDR039C	-100	-100
YDR040C ENA1 SGDID:S0002447, Chr IV from 538463-535188, reverse complement, Verified ORF	YDR040C	-100	-100
YDR041W RSM10 SGDID:S0002448, Chr IV from 539799-540410, Verified ORF	YDR041W	-100	-100
YDR044W HEM13 SGDID:S0002451, Chr IV from 546639-547625, Verified ORF	YDR044W	-100	-100
YDR046C BAP3 SGDID:S0002453, Chr IV from 550573-548759, reverse complement, Verified ORF	YDR046C	-100	-100
YDR047W HEM12 SGDID:S0002454, Chr IV from 551857-552945, Verified ORF	YDR047W	-100	-100
YDR050C TPI1 SGDID:S0002457, Chr IV from 556469-555723, reverse complement, Verified ORF	YDR050C	-100	-100
YDR052C DBF4 SGDID:S0002459, Chr IV from 560622-558508, reverse complement, Verified ORF	YDR052C	-100	-100
YDR054C CDC34 SGDID:S0002461, Chr IV from 562324-561437, reverse complement, Verified ORF	YDR054C	-100	-100
YDR055W PST1 SGDID:S0002462, Chr IV from 563524-564858, Verified ORF	YDR055W	-100	-100
YDR056C YDR056C SGDID:S0002463, Chr IV from 565637-565020, reverse complement, Uncharacterized ORF	YDR056C	-100	-100
YDR058C TGL2 SGDID:S0002465, Chr IV from 568700-567720, reverse complement, Verified ORF	YDR058C	-100	-100
YDR059C UBC5 SGDID:S0002466, Chr IV from 569767-569721,569630-569231, reverse complement, Verified ORF	YDR059C	-100	-100
YDR060W MAK21 SGDID:S0002467, Chr IV from 570645-573722, Verified ORF	YDR060W	-100	-100
YDR061W YDR061W SGDID:S0002468, Chr IV from 574160-575779, Uncharacterized ORF	YDR061W	-100	-100
YDR062W LCB2 SGDID:S0002469, Chr IV from 576470-578155, Verified ORF	YDR062W	-100	-100
YDR063W YDR063W SGDID:S0002470, Chr IV from 578660-579109, Uncharacterized ORF	YDR063W	-100	-100
YDR064W RPS13 SGDID:S0002471, Chr IV from 579455-579475,580015-580449, Verified ORF	YDR064W	-100	-100
YDR065W YDR065W SGDID:S0002472, Chr IV from 580684-581781, Uncharacterized ORF	YDR065W	-100	-100
YDR066C YDR066C SGDID:S0002473, Chr IV from 582495-581905, reverse complement, Uncharacterized ORF	YDR066C	-100	-100
YDR068W DOS2 SGDID:S0002475, Chr IV from 583710-584642, Verified ORF	YDR068W	-100	-100
YDR069C DOA4 SGDID:S0002476, Chr IV from 587716-584936, reverse complement, Verified ORF	YDR069C	-100	-100
YDR070C FMP16 SGDID:S0002477, Chr IV from 588376-588095, reverse complement, Uncharacterized ORF	YDR070C	-100	-100
YDR071C PAA1 SGDID:S0002478, Chr IV from 589399-588824, reverse complement, Uncharacterized ORF	YDR071C	-100	-100
YDR072C IPT1 SGDID:S0002479, Chr IV from 591341-589758, reverse complement, Verified ORF	YDR072C	-100	-100
YDR073W SNF11 SGDID:S0002480, Chr IV from 592435-592944, Verified ORF	YDR073W	-100	-100
YDR074W TPS2 SGDID:S0002481, Chr IV from 593889-596579, Verified ORF	YDR074W	-100	-100
YDR075W PPH3 SGDID:S0002482, Chr IV from 597152-598078, Verified ORF	YDR075W	-100	-100
YDR076W RAD55 SGDID:S0002483, Chr IV from 598464-599684, Verified ORF	YDR076W	-100	-100
YDR077W SED1 SGDID:S0002484, Chr IV from 600789-601805, Verified ORF	YDR077W	-100	-100
YDR079C-A TFB5 SGDID:S0007603, Chr IV from 603807-603589, reverse complement, Verified ORF	YDR079C-A	-100	-100
YDR079W PET100 SGDID:S0002486, Chr IV from 603060-603395, Verified ORF	YDR079W	-100	-100
YDR080W VPS41 SGDID:S0002487, Chr IV from 604004-606982, Verified ORF	YDR080W	-100	-100
YDR081C PDC2 SGDID:S0002488, Chr IV from 610077-607300, reverse complement, Verified ORF	YDR081C	-100	-100
YDR082W STN1 SGDID:S0002489, Chr IV from 610437-611921, Verified ORF	YDR082W	-100	-100
YDR083W RRP8 SGDID:S0002490, Chr IV from 612069-613220, Verified ORF	YDR083W	-100	-100
YDR084C TVP23 SGDID:S0002491, Chr IV from 613999-613400, reverse complement, Uncharacterized ORF	YDR084C	-100	-100
YDR086C SSS1 SGDID:S0002493, Chr IV from 617165-616923, reverse complement, Verified ORF	YDR086C	-100	-100
YDR087C RRP1 SGDID:S0002494, Chr IV from 618301-617465, reverse complement, Verified ORF	YDR087C	-100	-100
YDR088C SLU7 SGDID:S0002495, Chr IV from 619640-618492, reverse complement, Verified ORF	YDR088C	-100	-100
YDR090C YDR090C SGDID:S0002497, Chr IV from 625993-625061, reverse complement, Uncharacterized ORF	YDR090C	-100	-100
YDR091C RLI1 SGDID:S0002498, Chr IV from 628529-626703, reverse complement, Uncharacterized ORF	YDR091C	-100	-100
YDR092W UBC13 SGDID:S0002499, Chr IV from 629871-629900,630169-630600, Verified ORF	YDR092W	-100	-100
YDR096W GIS1 SGDID:S0002503, Chr IV from 637134-639818, Verified ORF	YDR096W	-100	-100
YDR097C MSH6 SGDID:S0002504, Chr IV from 643832-640104, reverse complement, Verified ORF	YDR097C	-100	-100
YDR098C GRX3 SGDID:S0002505, Chr IV from 645030-644173, reverse complement, Verified ORF	YDR098C	-100	-100
YDR098C-B YDR098C-B SGDID:S0007391, Chr IV from 651121-649817,649815-645853, reverse complement, Ty ORF	YDR098C-B	-100	-100
YDR099W BMH2 SGDID:S0002506, Chr IV from 653602-654423, Verified ORF	YDR099W	-100	-100
YDR100W TVP15 SGDID:S0002507, Chr IV from 655008-655439, Uncharacterized ORF	YDR100W	-100	-100
YDR101C ARX1 SGDID:S0002508, Chr IV from 657462-655681, reverse complement, Verified ORF	YDR101C	-100	-100
YDR105C TMS1 SGDID:S0002512, Chr IV from 666765-665344, reverse complement, Verified ORF	YDR105C	-100	-100
YDR106W ARP10 SGDID:S0002513, Chr IV from 666999-667853, Verified ORF	YDR106W	-100	-100
YDR107C YDR107C SGDID:S0002514, Chr IV from 671029-669011, reverse complement, Uncharacterized ORF	YDR107C	-100	-100
YDR108W GSG1 SGDID:S0002515, Chr IV from 671264-673360, Verified ORF	YDR108W	-100	-100
YDR109C YDR109C SGDID:S0002516, Chr IV from 675662-673515, reverse complement, Uncharacterized ORF	YDR109C	-100	-100
YDR115W YDR115W SGDID:S0002522, Chr IV from 682170-682487, Verified ORF	YDR115W	-100	-100
YDR116C MRPL1 SGDID:S0002523, Chr IV from 683576-682719, reverse complement, Verified ORF	YDR116C	-100	-100
YDR118W APC4 SGDID:S0002525, Chr IV from 685877-687835, Verified ORF	YDR118W	-100	-100
YDR119W YDR119W SGDID:S0002526, Chr IV from 688222-690528, Uncharacterized ORF	YDR119W	-100	-100
YDR120C TRM1 SGDID:S0002527, Chr IV from 693256-691544, reverse complement, Verified ORF	YDR120C	-100	-100
YDR121W DPB4 SGDID:S0002528, Chr IV from 693580-694170, Verified ORF	YDR121W	-100	-100
YDR123C INO2 SGDID:S0002530, Chr IV from 699463-698549, reverse complement, Verified ORF	YDR123C	-100	-100
YDR124W YDR124W SGDID:S0002531, Chr IV from 700310-701284, Uncharacterized ORF	YDR124W	-100	-100
YDR125C ECM18 SGDID:S0002532, Chr IV from 702753-701392, reverse complement, Verified ORF	YDR125C	-100	-100
YDR127W ARO1 SGDID:S0002534, Chr IV from 704479-709245, Verified ORF	YDR127W	-100	-100
YDR129C SAC6 SGDID:S0002536, Chr IV from 715374-715354,715242-713335, reverse complement, Verified ORF	YDR129C	-100	-100
YDR130C FIN1 SGDID:S0002537, Chr IV from 716617-715742, reverse complement, Verified ORF	YDR130C	-100	-100
YDR131C YDR131C SGDID:S0002538, Chr IV from 718455-716785, reverse complement, Uncharacterized ORF	YDR131C	-100	-100
YDR134C YDR134C SGDID:S0002541, Chr IV from 721476-721066, reverse complement, Pseudogene ORF	YDR134C	-100	-100
YDR135C YCF1 SGDID:S0002542, Chr IV from 727546-722999, reverse complement, Verified ORF	YDR135C	-100	-100
YDR137W RGP1 SGDID:S0002544, Chr IV from 728254-730245, Verified ORF	YDR137W	-100	-100
YDR138W HPR1 SGDID:S0002545, Chr IV from 730573-732831, Verified ORF	YDR138W	-100	-100
YDR139C RUB1 SGDID:S0002546, Chr IV from 733919-733771,733697-733613, reverse complement, Verified ORF	YDR139C	-100	-100
YDR140W YDR140W SGDID:S0002547, Chr IV from 734133-734798, Uncharacterized ORF	YDR140W	-100	-100
YDR141C DOP1 SGDID:S0002548, Chr IV from 739992-734896, reverse complement, Verified ORF	YDR141C	-100	-100
YDR142C PEX7 SGDID:S0002549, Chr IV from 741595-740468, reverse complement, Verified ORF	YDR142C	-100	-100
YDR143C SAN1 SGDID:S0002550, Chr IV from 743869-742037, reverse complement, Verified ORF	YDR143C	-100	-100
YDR144C MKC7 SGDID:S0002551, Chr IV from 746096-744306, reverse complement, Verified ORF	YDR144C	-100	-100
YDR145W TAF12 SGDID:S0002552, Chr IV from 746733-748352, Verified ORF	YDR145W	-100	-100
YDR148C KGD2 SGDID:S0002555, Chr IV from 755061-753670, reverse complement, Verified ORF	YDR148C	-100	-100
YDR151C CTH1 SGDID:S0002558, Chr IV from 765150-764173, reverse complement, Verified ORF	YDR151C	-100	-100
YDR152W GIR2 SGDID:S0002559, Chr IV from 765701-766498, Verified ORF	YDR152W	-100	-100
YDR153C ENT5 SGDID:S0002560, Chr IV from 767966-766731, reverse complement, Verified ORF	YDR153C	-100	-100
YDR155C CPR1 SGDID:S0002562, Chr IV from 768995-768507, reverse complement, Verified ORF	YDR155C	-100	-100
YDR156W RPA14 SGDID:S0002563, Chr IV from 769520-769933, Verified ORF	YDR156W	-100	-100
YDR159W SAC3 SGDID:S0002566, Chr IV from 771872-775777, Verified ORF	YDR159W	-100	-100
YDR161W YDR161W SGDID:S0002568, Chr IV from 779038-780201, Uncharacterized ORF	YDR161W	-100	-100
YDR162C NBP2 SGDID:S0002569, Chr IV from 781095-780385, reverse complement, Verified ORF	YDR162C	-100	-100
YDR163W CWC15 SGDID:S0002570, Chr IV from 781418-781945, Verified ORF	YDR163W	-100	-100
YDR164C SEC1 SGDID:S0002571, Chr IV from 784210-782036, reverse complement, Verified ORF	YDR164C	-100	-100
YDR165W TRM82 SGDID:S0002572, Chr IV from 784866-786200, Verified ORF	YDR165W	-100	-100
YDR166C SEC5 SGDID:S0002573, Chr IV from 789216-786301, reverse complement, Verified ORF	YDR166C	-100	-100
YDR167W TAF10 SGDID:S0002574, Chr IV from 789444-790064, Verified ORF	YDR167W	-100	-100
YDR168W CDC37 SGDID:S0002575, Chr IV from 790323-791843, Verified ORF	YDR168W	-100	-100
YDR169C STB3 SGDID:S0002576, Chr IV from 793884-792343, reverse complement, Verified ORF	YDR169C	-100	-100
YDR169C-A YDR169C-A SGDID:S0028538, Chr IV from 794718-794569, reverse complement, Uncharacterized ORF	YDR169C-A	-100	-100
YDR172W SUP35 SGDID:S0002579, Chr IV from 808319-810376, Verified ORF	YDR172W	-100	-100
YDR173C ARG82 SGDID:S0002580, Chr IV from 811627-810560, reverse complement, Verified ORF	YDR173C	-100	-100
YDR174W HMO1 SGDID:S0002581, Chr IV from 812105-812845, Verified ORF	YDR174W	-100	-100
YDR176W NGG1 SGDID:S0002583, Chr IV from 814447-816555, Verified ORF	YDR176W	-100	-100
[truncated: 3,817 more rows]
